# Supplementary material
Source: PubMed Central journal article supplement (PMC10799995)
Supplement: mcad135_suppl_supplementary_tables.pdf [file mcad135_suppl_supplementary_tables.pdf]

## SUPPLEMENTARY DATA

TABLE S1. List of genera containing species capable of CAM photosynthesis. Major clades are ordered following the linear classification system of APG IV (2016). References are provided for the initial reports substantiating CAM activity (as defined in Box 1) in each taxon, with additional references for reports of species sampled in their natural habitat (including carbon-isotope analyses) where appropriate. For species names that have been synonymized since first publication, the nomenclature used in the original report is indicated together with the currently accepted name in bold. Other reports of possible CAM activity that remain to be substantiated are listed in Supplementary Data Table S2.

| Major clade            | Genus                                            | References <sup>1</sup>                                                                                                                                                                                                        |
|------------------------|--------------------------------------------------|--------------------------------------------------------------------------------------------------------------------------------------------------------------------------------------------------------------------------------|
| ISOËTALES              |                                                  |                                                                                                                                                                                                                                |
| <b>Isoëtaceae</b>      | <i>Isoëtes</i> , including <i>Stylites</i>       | Keeley (1981, 1998); Keeley <i>et al.</i> (1984), as <i>Stylites andicola</i> Amstutz = <b><i>Isoëtes andicola</i></b> (Amstutz) L.D.Gómez                                                                                     |
| POLYPODIALES           |                                                  |                                                                                                                                                                                                                                |
| <b>Polypodiaceae</b>   |                                                  |                                                                                                                                                                                                                                |
| Microsoroideae         | <i>Lecanopteris</i> <sup>2</sup>                 | J.A.M. Holtum (unpublished); <i>Lecanopteris sinuosa</i> (Wall. ex Hook.) Copel.                                                                                                                                               |
|                        | <i>Microsorium</i>                               | Holtum and Winter (1999)                                                                                                                                                                                                       |
| Loxogrammoideae        | <i>Dictymia</i>                                  | Griffiths (1989)                                                                                                                                                                                                               |
| Polypodioideae         | <i>Niphidium</i>                                 | Holtum and Winter (1999), as <i>Polypodium crassifolium</i> L. = <b><i>Niphidium crassifolium</i></b> (L.) Lellinger                                                                                                           |
| Platyserioideae        | <i>Platyserium</i>                               | Winter <i>et al.</i> (1983)                                                                                                                                                                                                    |
|                        | <i>Pyrrhosia</i> , including <i>Drymoglossum</i> | Winter <i>et al.</i> (1983); Hew and Wong (1974) and Wong and Hew (1976), as <i>Drymoglossum piloselloides</i> (L.) C.Presl = <b><i>Pyrrhosia piloselloides</i></b> (L.) M.G.Price                                             |
| <b>Pteridaceae</b>     |                                                  |                                                                                                                                                                                                                                |
| Vittarioideae          | <i>Anetium</i> <sup>3</sup>                      | Martin <i>et al.</i> (2005)                                                                                                                                                                                                    |
|                        | <i>Haplopteris</i>                               | Martin <i>et al.</i> (2005), as <i>Vittaria flexuosa</i> Fée = <b><i>Haplopteris flexuosa</i></b> (Fée) E.H.Crane                                                                                                              |
|                        | <i>Vittaria</i>                                  | Carter and Martin (1994); Minardi <i>et al.</i> (2014)                                                                                                                                                                         |
| CYCADALES              |                                                  |                                                                                                                                                                                                                                |
| <b>Zamiaceae</b>       | <i>Dioon</i>                                     | Vovides <i>et al.</i> (2002)                                                                                                                                                                                                   |
| WELWITSCHIALES         |                                                  |                                                                                                                                                                                                                                |
| <b>Welwitschiaceae</b> | <i>Welwitschia</i>                               | Smith and Epstein (1971) <sup>4</sup> ; Dittrich and Huber (1974); Schulze <i>et al.</i> (1976); Vogel and Seely (1977); Ting and Burk (1983); von Willert (1985); Winter and Schramm (1986); von Willert <i>et al.</i> (2005) |
| PIPERALES              |                                                  |                                                                                                                                                                                                                                |
| <b>Piperaceae</b>      |                                                  |                                                                                                                                                                                                                                |
| Piperoideae            | <i>Peperomia</i>                                 | Warburg (1886); Virzo de Santo <i>et al.</i> (1983); Sternberg <i>et al.</i> (1984); Holthe <i>et al.</i> (1992); Holtum and Winter (2005)                                                                                     |

## ALISMATALES

**Alismataceae***Sagittaria*

Keeley (1996, 1998)

**Araceae***Zamioculcas*Holtum *et al.* (2007)**Hydrocharitaceae***Ottelia*Zhang *et al.* (2014)*Vallisneria*Helder and van Harmelen (1982); Webb *et al.* (1988);  
Keeley (1998)

## ASPARAGALES

**Orchidaceae**

## Epidendroideae

*Acianthera*Zotz and Ziegler (1997), as *Pleurothallis verecunda* Schltr. =  
*Acianthera verecunda* (Schltr.) Pridgeon & M.W.Chase;  
Silvera *et al.* (2010); Torres-Morales *et al.* (2020)*Aerangis*Kluge *et al.* (1995)*Aeranthes*Kluge *et al.* (1995)*Anathallis*Silvera *et al.* (2005, 2009), as *Specklinia barbulata* (Lindl.)  
Luer = *Anathallis barbulata* (Lindl.) Pridgeon &  
M.W.Chase*Angraecum*Kluge *et al.* (1995, 1998)*Arachnis*Avadhani *et al.* (1982)*Aspasia*Silvera *et al.* (2005, 2009)*Barkeria*Silvera *et al.* (2009, 2010)*Bogoria*Winter *et al.* (1983), as *Sarcochilus moorei* (Rchb.f.) Schltr. =  
*Bogoria moorei* (Rchb.f.) M.A.Clem. & D.L.Jones*Brassavola*Coutinho (1969); Zotz and Ziegler (1997); Rundel *et al.*  
(1999); Silvera *et al.* (2005); Torres-Morales *et al.* (2020)*Brassia*Zotz and Ziegler (1997); Silvera *et al.* (2005)*Bryobium*Winter *et al.* (1983), as *Eria irukandjiana* St.Cloud =  
*Bryobium irukandjiana* (St.Cloud) M.A.Clem. &  
D.L.Jones*Bulbophyllum*McWilliams (1970); Winter *et al.* (1983); Silvera *et al.* (2005);  
Holtum *et al.* (2016)*Caluera*<sup>5</sup>K. Silvera (unpublished): *Caluera vulpina* Dodson &  
Determann*Campylocentrum*Winter *et al.* (1985); Mooney *et al.* (1989); Zotz and Ziegler  
(1997); Zotz (2004); Silvera *et al.* (2009, 2010); Torres-  
Morales *et al.* (2020); Oliveira *et al.* (2021)*Capanemia*<sup>5</sup>*Cattleya*, including *Sophronitis*K. Silvera (unpublished): *Capanemia micromera* Barb.Rodr.  
Warburg (1886); Coutinho (1969), as *Sophronitis cernua*  
Lindl. = *Cattleya cernua* (Lindl.) Van den Berg; Zotz and  
Ziegler (1997); Silvera *et al.* (2005); Torres-Morales *et al.*  
(2020)*Caularthron*Zotz and Ziegler (1997); Silvera *et al.* (2010)*Chiloschista*Winter *et al.* (1983); Cockburn *et al.* (1985); Benzing (1990);  
Holtum *et al.* (2016)*Cischweinfia*Silvera *et al.* (2005)*Coelogyne*, including *Pholidota*Winter *et al.* (1983), as *Pholidota pallida* Lindl. = *Coelogyne*  
*pallida* (Lindl.) Rchb.f.; Silvera *et al.* (2005)*Comparettia*, including*Scelochilus*Silvera *et al.* (2010); Torres-Morales *et al.* (2020), including  
*Scelochilus ottonis* Klotzsch = *Comparettia ottonis*  
(Klotzsch) M.W.Chase & N.H.Williams*Coryanthes*Silvera *et al.* (2005)*Cymbidium*Warburg (1886); Winter *et al.* (1983); Motomura *et al.* (2008);  
Holtum *et al.* (2016)*Cyrtopodium*

Coutinho (1969)

- Dendrobium*, including *Cadetia*,  
*Dockrillia*, *Flickingeria*, and  
*Grastidium* Nuernbergk (1961); Winter *et al.* (1983), as *Cadetia*  
*maideniana* (Schltr.) Schltr. = ***Dendrobium maidenianum***  
Schltr., *Dockrillia linguiformis* (Sw.) Brieger =  
***Dendrobium linguiforme*** Sw., and *Flickingeria convexa*  
(Blume) A.D.Hawkes = ***Dendrobium convexum*** (Blume)  
Lindl.; Sinclair (1984); Kluge *et al.* (1989); Holtum *et al.*  
(2016), as *Grastidium luteocilium* (Rupp) Rauschert =  
***Dendrobium luteocilium*** Rupp; Qui *et al.* (2016)
- Dendrophylax*, including  
*Polyradicion* Benzing and Ott (1981), as *Polyradicion lindenii* (Lindl.)  
Garay = ***Dendrophylax lindenii*** (Lindl.) Benth. ex Rolfe  
*Didymoplexis* Holtum *et al.* (2016)  
*Dimerandra* Zotz and Tyree (1996); Silvera *et al.* (2005)
- Dimerandra* Zotz and Tyree (1996); Silvera *et al.* (2005)
- Echinosepala*, including *Brenesia* Silvera *et al.* (2005), as *Brenesia lappiformis* (A.H.Heller &  
L.O.Williams) Luer = ***Echinosepala lappiformis***  
(A.H.Heller & L.O.Williams) Pridgeon & M.W.Chase  
*Elleanthus* Torres-Morales *et al.* (2020)  
*Encyclia* Coutinho (1969); Silvera *et al.* (2005); Torres-Morales *et al.*  
(2020)
- Epidendrum*, including *Lanium*  
and *Oerstedella* Bendrat (1929); Nuernbergk (1961); Coutinho (1963); Milburn  
*et al.* (1968); Coutinho (1969), as *Lanium avicula* Lindl. ex  
Benth. = ***Epidendrum avicula*** Lindl.; McWilliams (1970);  
Reinert *et al.* (1997); Zotz and Ziegler (1997); Silvera *et al.*  
(2005), as *Oerstedella pseudoschumanniana* (Fowlie)  
Hágsater = ***Epidendrum pseudoschumannianum*** Fowlie;  
Wester *et al.* (2011); Torres-Morales *et al.* (2020); Oliveira  
*et al.* (2021)
- Eriopsis* Silvera *et al.* (2005)  
*Erycina*, including *Psygmorchis* Mooney *et al.* (1989); Silvera *et al.* (2005), as *Psygmorchis*  
*pusilla* (L.) Dodson & Dressler = ***Erycina pusilla*** (L.)  
N.H.Williams & M.W.Chase
- Eulophia*, including *Acrolophia*,  
*Lissochilus*, *Oeceoclades*, and  
*Orthochilus* Kluge *et al.* (1995), as *Lissochilus beravensis* (Rchb.f.)  
H.Perrier = ***Eulophia beravensis*** Rchb.f.; Silvera *et al.*  
(2010), as *Oeceoclades maculata* (Lindl.) Lindl. =  
***Eulophia maculata*** (Lindl.) Rchb.f.; Bone *et al.* (2015), as  
*Acrolophia micrantha* (Lindl.) Pfitzer = ***Eulophia***  
***micrantha*** Lindl., and *Orthochilus aculeatus* (L.f.)  
Bytebier = ***Eulophia aculeata*** (L.f.) Spreng.
- Gomesa* Silvera *et al.* (2005), as *Oncidium flexuosum* G.Lodd. =  
***Gomesa flexuosa*** (G.Lodd.) M.W.Chase & N.H.Williams
- Gongora*, including *Acropera* Warburg (1886), as *Acropera* [*Acropegia*] *loddigesii* Lindl. =  
***Gongora galeata*** (Lindl. ex Bosse) Rchb.f.
- Guarianthe* Zotz and Ziegler (1997), as *Cattleya patinii* Cogn. =  
***Guarianthe hennisiana*** (Rolfe) Van den Berg
- Hintonella*<sup>5</sup> K. Silvera (unpublished); *Hintonella mexicana* Ames  
*Ionopsis* Silvera *et al.* (2005); Torres-Morales *et al.* (2020)  
*Jacquinilla* Zotz (2004); Torres-Morales *et al.* (2020)
- Laelia*, including *Schomburgkia* Nuernbergk (1961), as *Schomburgkia crispera* Lindl. = ***Laelia***  
***marginata*** (Lindl.) L.O.Williams; Silvera *et al.* (2005), as  
*Schomburgkia undulata* var. *lueddemannii* (Prill.) H.G.Jones  
= ***Laelia lueddemannii*** (Prill.) L.O.Williams; Silvera *et al.*  
(2010)
- Leochilus* Silvera *et al.* (2010)  
*Lockhartia* Zotz and Ziegler (1997); Zotz (2004); Silvera *et al.* (2005,  
2010)

- Luisia*  
*Lycaste*
- Macradenia*<sup>5</sup>  
*Macroclinium*  
*Maxillaria*, including  
*Camaridium*, *Heterotaxis*,  
*Ornithidium*, and *Trigonidium*
- Meiracyllium*  
*Microcoelia*, including *Gussonea*  
and multiple species segregated  
from *Solenangis*
- Micropera*  
*Mobilabium*  
*Mormodes*  
*Myoxanthus*  
*Myrmecophila*, including  
*Schomburgkia*
- Notylia*
- Oberonia*  
*Oeonia*  
*Oncidium*
- Ornithocephalus*  
*Pabstiella*  
*Peristeria*  
*Phalaenopsis*, including *Sedirea*
- Platyrhiza*<sup>5</sup>  
*Plectorrhiza*  
*Plectrophora*  
*Pleurothallis*  
*Pomatocalpa*  
*Prosthechea*  
*Psychilis*
- Psychopsis*  
*Pterostemma*  
*Quekettia*<sup>5</sup>  
*Rhinerrhiza*  
*Robiquetia*  
*Rodriguezia*
- Rossioglossum*, including  
*Chelyorchis*
- Winter *et al.* (1983); Earnshaw *et al.* (1987)  
Warburg (1886), as *Maxillaria aromatica* Graham = ***Lycaste aromatica*** (Graham) Lindl.  
K. Silvera (unpublished): *Macradenia lutescens* R.Br.  
Silvera *et al.* (2005)  
Warburg (1886), as *Ornithidium densum* Rchb.f. = ***Maxillaria densa*** Lindl.; Zotz and Ziegler (1997); Silvera *et al.* (2005), as *Heterotaxis sessilis* (Sw.) F.Barros = ***Maxillaria crassifolia*** (Lindl.) Rchb.f., and *Trigonidium egertonianum* Bateman ex Lindl. = ***Maxillaria egertoniana*** (Bateman ex Lindl.) Molinari; Silvera *et al.* (2010), as *Camaridium ctenostachys* (Rchb.f.) Schltr. = ***Maxillaria ctenostachys*** Rchb.f.  
Torres-Morales *et al.* (2020)  
Kluge *et al.* (1995), as *Gussonea aphylla* (Thouars) A.Rich. = ***Microcoelia aphylla*** (Thouars) Summerh., and *Solenangis aphylla* (Thouars) Summerh. = ***Microcoelia aphylla*** (Thouars) Summerh.; Roth-Nebelsick *et al.* (2021)  
Winter *et al.* (1983)  
Winter *et al.* (1983)  
Silvera *et al.* (2005)  
Silvera *et al.* (2010)  
Griffiths *et al.* (1989), as *Schomburgkia humboldtii* (Rchb.f.) Rchb.f. = ***Myrmecophila humboldtii*** (Rchb.f.) Rolfe; Mooney *et al.* (1989); Silvera *et al.* (2005); Ricalde *et al.* (2010); Santiago *et al.* (2017)  
Zotz (2004); Silvera *et al.* (2005, 2010); Torres-Morales *et al.* (2020)  
Winter *et al.* (1983)  
Kluge *et al.* (1995)  
Warburg (1886); Coutinho (1963); Mooney *et al.* (1989); Silvera *et al.* (2005)  
Zotz and Ziegler (1997); Silvera *et al.* (2005)  
Torres-Morales *et al.* (2020)  
Silvera *et al.* (2005)  
Nuernbergk (1963); McWilliams (1970); Winter *et al.* (1983); Hogewoning *et al.* (2021); Lee *et al.* (2021), as *Sedirea japonica* (Rchb.f.) Garay & H.R.Sweet = ***Phalaenopsis japonica*** (Rchb.f.) Kocyan & Schuit.  
K. Silvera (unpublished): *Platyrhiza quadricolor* Barb.Rodr.  
Winter *et al.* (1983)  
Silvera *et al.* (2010)  
Silvera *et al.* (2005)  
Winter *et al.* (1983)  
Silvera *et al.* (2005)  
Nuernbergk (1961), as *Encyclia atropurpurea* (Willd.) Schltr. = ***Psychilis atropurpurea*** (Willd.) Sauleda  
Torres-Morales *et al.* (2020)  
Torres-Morales *et al.* (2020)  
K. Silvera (unpublished): *Quekettia jenmanii* Rchb.f.  
Winter *et al.* (1983)  
Winter *et al.* (1983); Earnshaw *et al.* (1987)  
Zotz and Ziegler (1997); Silvera *et al.* (2005); Torres-Morales *et al.* (2020)  
Zotz and Ziegler (1997), as *Oncidium ampliatum* Lindl. = ***Rossioglossum ampliatum*** (Lindl.) M.W.Chase &

- N.H. Williams; Silvera *et al.* (2005), as *Chelyorchis ampliata* (Lindl.) Dressler & N.H. Williams = **Rossioglossum ampliatum** (Lindl.) M.W. Chase & N.H. Williams; Silvera *et al.* (2010, 2014)
- Saccolabiopsis* Winter *et al.* (1983)
- Saccolabium* Earnshaw *et al.* (1987)
- Sarcochilus* Winter *et al.* (1983)
- Scaphyglottis* Silvera *et al.* (2005)
- Schoenorchis* Winter *et al.* (1983)
- Sobralia* Silvera *et al.* (2005)
- Solenidium* Torres-Morales *et al.* (2020)
- Stanhopea* Guevara-Pérez *et al.* (2019)
- Stelis* Silvera *et al.* (2005), as *Pleurothallis racemiflora* (Sw.) Lindl. ex Hook. = **Stelis multirostris** (Rchb.f.) Pridgeon & M.W. Chase
- Taeniophyllum* Winter *et al.* (1983)
- Tetramicra* Ting (1989)
- Thrixspermum* Winter *et al.* (1983)
- Tolumnia*<sup>5</sup> K. Silvera (unpublished): *Tolumnia variegata* (Sw.) Braem
- Trachoma* Winter *et al.* (1983)
- Trichocentrum*, including Zotz and Ziegler (1997), as *Oncidium stipitatum* Lindl. = **Trichocentrum lacerum** (Lindl.) J.M.H. Shaw; Zotz (2004); Silvera *et al.* (2005, 2010); Santiago *et al.* (2017), as *Cohniella cebolleta* (Jacq.) Christenson = **Trichocentrum cebolleta** (Jacq.) M.W. Chase & N.H. Williams
- Trichoglottis* Winter *et al.* (1983); Holtum *et al.* (2016)
- Trichopilia* Silvera *et al.* (2005)
- Trichotosia* Sinclair (1984), as *Eria velutina* Lodd. ex Lindl. = **Trichotosia velutina** (Lodd. ex Lindl.) Kraenzl.
- Trizeuxis* Silvera *et al.* (2010); Torres-Morales *et al.* (2020)
- Vanda*, including *Ascocentrum* McWilliams (1970), as *Ascocentrum ampullaceum* (Roxb.) Schltr. = **Vanda ampullacea** (Roxb.) L.M. Gardiner; Winter *et al.* (1983)
- Warmingia*<sup>5</sup> K. Silvera (unpublished): *Warmingia eugenii* Rchb.f.
- Zygostates*<sup>5</sup> K. Silvera (unpublished): *Zygostates cornuta* Lindl.
- Vanilloideae *Vanilla* Warburg (1886); Bendrat (1929); Coutinho (1963); McWilliams (1970); Reinert *et al.* (1997); Zotz and Ziegler (1997); Silvera *et al.* (2005)
- Asphodelaceae**
- Alooideae *Aloe* de Vries (1884); Warburg (1886); Nuernbergk (1954, 1961); Schütte *et al.* (1967); Holdsworth (1971); Dittrich *et al.* (1973); Troughton *et al.* (1974b); Kluge *et al.* (1979); Ziegler (1979); Sternberg *et al.* (1984)
- Aloidendron* Schulze *et al.* (1991), as *Aloe dichotoma* Masson = **Aloidendron dichotomum** (Masson) Klopper & Gideon F.Sm.; Rundel *et al.* (1999), as *Aloe ramosissima* Pillans = **Aloidendron ramosissimum** (Pillans) Klopper & Gideon F.Sm.
- Aristaloe* Nuernbergk (1961), as *Aloe aristata* Haw. = **Aristaloe aristata** (Haw.) Boatwr. & J.C. Manning
- Astroloba*, including *Poellnitzia* Schütte *et al.* (1967), as *Poellnitzia rubriflora* (L. Bolus) Uitewaal = **Astroloba rubriflora** (L. Bolus) Gideon F.Sm. & J.C. Manning; Dittrich *et al.* (1973), as *Apicra* ('*Apiera*') *spiralis* (L.) Baker = **Astroloba spiralis** (L.) Uitewaal

|                             |                                                                                                                                                                                             |                                                                                                                                                                                                                                                                                                                                                                                                                                                                                                                                                                                                                                                                                                                                                                                                       |
|-----------------------------|---------------------------------------------------------------------------------------------------------------------------------------------------------------------------------------------|-------------------------------------------------------------------------------------------------------------------------------------------------------------------------------------------------------------------------------------------------------------------------------------------------------------------------------------------------------------------------------------------------------------------------------------------------------------------------------------------------------------------------------------------------------------------------------------------------------------------------------------------------------------------------------------------------------------------------------------------------------------------------------------------------------|
|                             | <i>Gasteria</i>                                                                                                                                                                             | Nuernbergk (1961); Schütte <i>et al.</i> (1967); Troughton <i>et al.</i> (1974b); Mooney <i>et al.</i> (1977a)                                                                                                                                                                                                                                                                                                                                                                                                                                                                                                                                                                                                                                                                                        |
|                             | <i>Gonialoe</i>                                                                                                                                                                             | Troughton <i>et al.</i> (1974a), as <i>Aloe variegata</i> L. = <b><i>Gonialoe variegata</i></b> (L.) Boatwr. & J.C.Manning                                                                                                                                                                                                                                                                                                                                                                                                                                                                                                                                                                                                                                                                            |
|                             | <i>Haworthia</i>                                                                                                                                                                            | Kraus (1883); Schütte <i>et al.</i> (1967); Troughton <i>et al.</i> (1974b), as [ <i>Haworthis</i> ]                                                                                                                                                                                                                                                                                                                                                                                                                                                                                                                                                                                                                                                                                                  |
|                             | <i>Haworthiopsis</i>                                                                                                                                                                        | Bender <i>et al.</i> (1973), as <i>Haworthia attenuata</i> (Haw.) Haw. = <b><i>Haworthiopsis attenuata</i></b> (Haw.) G.D.Rowley                                                                                                                                                                                                                                                                                                                                                                                                                                                                                                                                                                                                                                                                      |
|                             | <i>Tulista</i>                                                                                                                                                                              | Mooney <i>et al.</i> (1977a), as <i>Haworthia margaritifera</i> (L.) Haw. = <b><i>Tulista pumila</i></b> (L.) G.D.Rowley                                                                                                                                                                                                                                                                                                                                                                                                                                                                                                                                                                                                                                                                              |
| Asphodeloideae <sup>6</sup> | <i>Bulbine</i> <sup>7</sup>                                                                                                                                                                 | J.A.M. Holtum (unpublished): <i>Bulbine bulbosa</i> (R.Br.) Haw. and <i>B. frutescens</i> (L.) Willd.                                                                                                                                                                                                                                                                                                                                                                                                                                                                                                                                                                                                                                                                                                 |
| <b>Asparagaceae</b>         |                                                                                                                                                                                             |                                                                                                                                                                                                                                                                                                                                                                                                                                                                                                                                                                                                                                                                                                                                                                                                       |
| Agavoideae                  | <i>Agave</i> , including <i>Manfreda</i> and <i>Polianthes</i>                                                                                                                              | de Saussure (1804); Thomas and Ranson (1954); Neales <i>et al.</i> (1968); Dittrich <i>et al.</i> (1973); Mooney <i>et al.</i> (1974); Eickmeier and Bender (1976); Nobel (1976); Ziegler (1979); Heyduk <i>et al.</i> (2016), as <i>Manfreda scabra</i> (Ortega) McVaugh = <b><i>Agave scabra</i></b> Ortega; Reddy and Das (1978) and Heyduk <i>et al.</i> (2022), as <i>Polianthes tuberosa</i> L. = <b><i>Agave amica</i></b> (Medik.) Thiede & Govaerts                                                                                                                                                                                                                                                                                                                                          |
|                             | <i>Beschorneria</i>                                                                                                                                                                         | Heyduk <i>et al.</i> (2018, 2022)                                                                                                                                                                                                                                                                                                                                                                                                                                                                                                                                                                                                                                                                                                                                                                     |
|                             | <i>Furcraea</i>                                                                                                                                                                             | Olivares and Medina (1990), as [ <i>Fourcroya</i> ] <i>humboldtiana</i> Trel. = <b><i>Furcraea acaulis</i></b> (Kunth) B.Ullrich; Winter and Smith (2022)                                                                                                                                                                                                                                                                                                                                                                                                                                                                                                                                                                                                                                             |
|                             | <i>Hesperaloe</i>                                                                                                                                                                           | Ravetta and McLaughlin (1993); Heyduk <i>et al.</i> (2022)                                                                                                                                                                                                                                                                                                                                                                                                                                                                                                                                                                                                                                                                                                                                            |
|                             | <i>Yucca</i>                                                                                                                                                                                | Mooney <i>et al.</i> (1974); Smith and Madhavan (1982); Heyduk <i>et al.</i> (2019, 2022)                                                                                                                                                                                                                                                                                                                                                                                                                                                                                                                                                                                                                                                                                                             |
| Nolinoideae                 | <i>Beaucarnea</i><br><i>Sansevieria</i> <sup>8</sup>                                                                                                                                        | Reyes-Garcia <i>et al.</i> (2022)<br>Warburg (1886); Nuernbergk (1961); Milburn <i>et al.</i> (1968); Dittrich <i>et al.</i> (1973); Mooney <i>et al.</i> (1977a); Martin <i>et al.</i> (2019)                                                                                                                                                                                                                                                                                                                                                                                                                                                                                                                                                                                                        |
| COMMELINALES                |                                                                                                                                                                                             |                                                                                                                                                                                                                                                                                                                                                                                                                                                                                                                                                                                                                                                                                                                                                                                                       |
| <b>Commelinaceae</b>        |                                                                                                                                                                                             |                                                                                                                                                                                                                                                                                                                                                                                                                                                                                                                                                                                                                                                                                                                                                                                                       |
| Commelinoideae              | <i>Callisia</i><br><i>Cyanotis</i><br><i>Tradescantia</i><br><i>Tripogandra</i>                                                                                                             | Martin <i>et al.</i> (1990)<br>Schütte <i>et al.</i> (1967)<br>Warburg (1886); Martin <i>et al.</i> (1994)<br>Martin <i>et al.</i> (1990)                                                                                                                                                                                                                                                                                                                                                                                                                                                                                                                                                                                                                                                             |
| POALES                      |                                                                                                                                                                                             |                                                                                                                                                                                                                                                                                                                                                                                                                                                                                                                                                                                                                                                                                                                                                                                                       |
| <b>Bromeliaceae</b>         |                                                                                                                                                                                             |                                                                                                                                                                                                                                                                                                                                                                                                                                                                                                                                                                                                                                                                                                                                                                                                       |
| Bromelioideae               | <i>Acanthostachys</i><br><i>Aechmea</i> , including <i>Streptocalyx</i><br><br><i>Ananas</i><br><br><i>Androlepis</i><br><i>Araeococcus</i><br><br><i>Billbergia</i><br><br><i>Bromelia</i> | Warburg (1886); Coutinho (1969); Medina <i>et al.</i> (1977)<br>Warburg (1886); Coutinho (1969); Dittrich <i>et al.</i> (1973); Medina (1974); Griffiths and Smith (1983)<br>Warburg (1886); Sideris <i>et al.</i> (1948); Seshagiri and Suryanarayanamurthy (1957); Milburn <i>et al.</i> (1968); Neales <i>et al.</i> (1968); Coutinho (1969); Bender <i>et al.</i> (1973); Dittrich <i>et al.</i> (1973); Medina (1974)<br>Crayn <i>et al.</i> (2015)<br>McWilliams (1970); Griffiths and Smith (1983); Crayn <i>et al.</i> (2015)<br>Warburg (1886); Bendrat (1929); Nuernbergk (1961); McWilliams (1970); Dittrich <i>et al.</i> (1973); Medina (1974); Griffiths and Smith (1983)<br>Nuernbergk (1961); Coutinho (1969); Medina (1974); Medina and Troughton (1974); Griffiths and Smith (1983) |

|                 |                                                                           |                                                                                                                                                                                                                                                    |
|-----------------|---------------------------------------------------------------------------|----------------------------------------------------------------------------------------------------------------------------------------------------------------------------------------------------------------------------------------------------|
|                 | <i>Canistropsis</i>                                                       | Crayn <i>et al.</i> (2015)                                                                                                                                                                                                                         |
|                 | <i>Canistrum</i>                                                          | Coutinho (1963); Medina <i>et al.</i> (1977)                                                                                                                                                                                                       |
|                 | <i>Cryptanthus</i>                                                        | Bendrat (1929); Dittrich <i>et al.</i> (1973); Crayn <i>et al.</i> (2015)                                                                                                                                                                          |
|                 | <i>Deinacanthos</i>                                                       | Crayn <i>et al.</i> (2015)                                                                                                                                                                                                                         |
|                 | <i>Disteganthus</i>                                                       | Crayn <i>et al.</i> (2015)                                                                                                                                                                                                                         |
|                 | <i>Edmundoa</i>                                                           | Crayn <i>et al.</i> (2015)                                                                                                                                                                                                                         |
|                 | <i>Eduandrea</i>                                                          | Crayn <i>et al.</i> (2015)                                                                                                                                                                                                                         |
|                 | <i>Forzzaea</i>                                                           | Crayn <i>et al.</i> (2015), as <i>Cryptanthus leopoldo-horstii</i> Rauh =<br><b><i>Forzzaea leopoldo-horstii</i></b> (Rauh) Leme, S.Heller & Zizka                                                                                                 |
|                 | <i>Hohenbergia</i>                                                        | Medina <i>et al.</i> (1977); Griffiths and Smith (1983)                                                                                                                                                                                            |
|                 | <i>Hohenbergiopsis</i>                                                    | Crayn <i>et al.</i> (2015)                                                                                                                                                                                                                         |
|                 | <i>Hylaeaicum</i> ; multiple species<br>segregated from <i>Neoregelia</i> | Crayn <i>et al.</i> (2015), as <i>Neoregelia leviana</i> L.B.Sm. =<br><b><i>Hylaeaicum levianum</i></b> (L.B.Sm.) Leme & Forzza                                                                                                                    |
|                 | <i>Karawata</i>                                                           | Crayn <i>et al.</i> (2015), as <i>Aechmea multiflora</i> L.B.Sm. =<br><b><i>Karawata multiflora</i></b> (L.B.Sm.) J.R.Maciel & G.Sousa                                                                                                             |
|                 | <i>Lymania</i>                                                            | Crayn <i>et al.</i> (2015)                                                                                                                                                                                                                         |
|                 | <i>Neoglaziovia</i>                                                       | Medina <i>et al.</i> (1977); Crayn <i>et al.</i> (2015)                                                                                                                                                                                            |
|                 | <i>Neoregelia</i>                                                         | Warburg (1886), as [ <i>Nidularia Mayendorffii</i> ] (Regel) Regel =<br><b><i>Neoregelia carolinae</i></b> (Beer) L.B.Sm.; Nuernbergk (1961);<br>Coutinho (1963); McWilliams (1970); Dittrich <i>et al.</i> (1973);<br>Medina <i>et al.</i> (1977) |
|                 | <i>Nidularium</i>                                                         | Bendrat (1929); Medina <i>et al.</i> (1977)                                                                                                                                                                                                        |
|                 | <i>Ochagavia</i> <sup>9</sup>                                             | J. Males, S.F. Worsley, and J.A.C. Smith (unpublished):<br><i>Ochagavia litoralis</i> (Phil.) Zizka, Trumpler & Zoellner                                                                                                                           |
|                 | <i>Orthophytum</i>                                                        | Coutinho (1969); Medina <i>et al.</i> (1977)                                                                                                                                                                                                       |
|                 | <i>Portea</i>                                                             | Bendrat (1929); Medina <i>et al.</i> (1977)                                                                                                                                                                                                        |
|                 | <i>Pseudananas</i>                                                        | Crayn <i>et al.</i> (2015)                                                                                                                                                                                                                         |
|                 | <i>Pseudaraeococcus</i>                                                   | Crayn <i>et al.</i> (2015), as <i>Araeococcus parviflorus</i> (Mart. ex<br>Schult. & Schult.f.) Lindm. = <b><i>Pseudaraeococcus</i></b><br><b><i>parviflorus</i></b> (Mart. ex Schult. & Schult.f.) R.A.Pontes &<br>Versieux                       |
|                 | <i>Quesnelia</i>                                                          | Coutinho (1963, 1964, 1969); Medina <i>et al.</i> (1977)                                                                                                                                                                                           |
|                 | <i>Ronnbergia</i>                                                         | Coutinho (1963)                                                                                                                                                                                                                                    |
|                 | <i>Sincoraea</i> ; multiple species<br>segregated from <i>Orthophytum</i> | Crayn <i>et al.</i> (2015), as <i>Orthophytum albopictum</i> Philcox =<br><b><i>Sincoraea albopicta</i></b> (Philcox) Louzada & Wand.                                                                                                              |
|                 | <i>Ursulaea</i> <sup>10</sup>                                             | Crayn <i>et al.</i> (2015)                                                                                                                                                                                                                         |
|                 | <i>Wittrockia</i>                                                         | Medina <i>et al.</i> (1977); Crayn <i>et al.</i> (2015)                                                                                                                                                                                            |
| Hechtioideae    | <i>Hechtia</i> <sup>11</sup>                                              | Lüttge (1987); Mooney <i>et al.</i> (1989); Crayn <i>et al.</i> (2015)                                                                                                                                                                             |
| Pitcairnioideae | <i>Deuterocohnia</i> , including<br><i>Abromeitiella</i>                  | Griffiths (1984), as <i>Abromeitiella brevifolia</i> (Griseb.) A.Cast.=<br><b><i>Deuterocohnia brevifolia</i></b> (Griseb.) M.A.Spencer &<br>L.B.Sm.; Crayn <i>et al.</i> (2015)                                                                   |
|                 | <i>Dyckia</i>                                                             | Warburg (1886); Coutinho (1969); McWilliams (1970);<br>Medina (1974); Medina and Troughton (1974)                                                                                                                                                  |
|                 | <i>Encholirium</i>                                                        | Medina <i>et al.</i> (1977); Crayn <i>et al.</i> (2015)                                                                                                                                                                                            |
| Puyoideae       | <i>Puya</i>                                                               | Mooney <i>et al.</i> (1974); Medina <i>et al.</i> (1977); Crayn <i>et al.</i><br>(2015)                                                                                                                                                            |
| Tillandsioideae | <i>Guzmania</i>                                                           | McWilliams (1970); Medina (1974); Medina and Troughton<br>(1974); Smith <i>et al.</i> (1985)                                                                                                                                                       |
|                 | <i>Josemania</i> <sup>12</sup>                                            | Coutinho (1963), as <i>Tillandsia asplundii</i> L.B.Sm. =<br><b><i>Josemania asplundii</i></b> (L.B.Sm.) W.Till & Barfuss                                                                                                                          |
|                 | <i>Lemeltonia</i>                                                         | Crayn <i>et al.</i> (2015), as <i>Tillandsia triglochinosides</i> C.Presl =<br><b><i>Lemeltonia triglochinosides</i></b> (C.Presl) Barfuss & W.Till                                                                                                |
|                 | <i>Tillandsia</i>                                                         | Warburg (1886); Coutinho (1969); McWilliams (1970);<br>Benzing and Renfrow (1971); Smith and Epstein (1971);                                                                                                                                       |

- Werauhia* Bender *et al.* (1973); Dittrich *et al.* (1973); Kluge *et al.* (1973); Medina (1974); Medina and Troughton (1974) Zotz (1997), Schmidt and Zotz (2001), Pierce *et al.* (2002), and Beltrán *et al.* (2013), as *Vriesea sanguinolenta* Cogn. & Marchal = *Werauhia sanguinolenta* (Cogn. & Marchal) J.R.Grant
- SAXIFRAGALES  
**Crassulaceae**<sup>13</sup>  
 Crassuloideae *Crassula*, including *Rochea* de Saussure (1804); Mayer (1875); Kraus (1883); de Vries (1884); Bonner and Bonner (1948); Thomas and Ranson (1954); Schütte *et al.* (1967), as *Rochea [coccinea]* (L.) DC. = *Crassula coccinea* L.; Milburn (1968); Holdsworth (1971); Mooney *et al.* (1977a)
- Kalanchoideae *Adromischus* Mooney *et al.* (1977a)  
*Cotyledon* Schütte *et al.* (1967); Mooney *et al.* (1977a)  
*Kalanchoë*, including Heyne (1815), as *Cotyledon calycina* Roth = *Kalanchoë pinnata* (Lam.) Pers.; Mayer (1875), Kraus (1883), Warburg (1886), Bendrat (1929), and Nishida (1963), as *Bryophyllum calycinum* Salisb. = *Kalanchoë pinnata* (Lam.) Pers.; Kluge *et al.* (1993); Yang *et al.* (2017)  
*Bryophyllum*
- Sempervivoideae *Tylecodon* Rundel *et al.* (1999); Veste *et al.* (2001)  
*Aeonium*, including *Greenovia* de Vries (1884), as *Sempervivum glutinosum* Aiton = *Aeonium glutinosum* (Aiton) Webb & Berthel.; Neales *et al.* (1968); Dittrich (1976), as '*Aeonium [Sempervivum] poculiforme*' = *Aeonium simsii* (Sweet) Stearn; Ziegler (1979); Tenhunen *et al.* (1982), as *Greenovia aurea* (C.Sm. ex Hornem.) Webb & Berthel. = *Aeonium aureum* (C.Sm. ex Hornem.) T.H.M.Mes; Jimenez *et al.* (1983); Lösch (1984); Pilon-Smits *et al.* (1992)
- Aichryson* Lösch (1984)  
*Cremnophila* Teeri *et al.* (1981)  
*Dudleya*, including *Hasseanthus* Nishida (1963), as *Cotyledon peacockii* Baker = *Dudleya pulverulenta* (Nutt.) Britton & Rose; Ting and Dugger (1968); Bartholomew (1973); Mooney *et al.* (1974); Teeri (1982) as *Hasseanthus* (individual species not listed)
- Echeveria* de Vries (1884); Warburg (1886); Astruc (1903); Nuernbergk (1961); Bender (1971); Holdsworth (1971); Meinzer and Rundel (1973); Medina and Delgado (1976); Rundel *et al.* (1979)
- Graptopetalum* Rundel *et al.* (1979); Iwasaki *et al.* (1988)  
*Hylotelephium* Thomas and Ranson (1954), as *Sedum purpureum* (L.) Schult. = *Hylotelephium telephium* (L.) H.Ohba ssp. *telephium*; Bender *et al.* (1973), Dittrich *et al.* (1973), Groenhof *et al.* (1985), Kenyon *et al.* (1985), Lee and Griffiths (1987), and Borland and Griffiths (1990) as *Sedum telephium* L. = *Hylotelephium telephium* (L.) H.Ohba; Golovko *et al.* (2021)
- Lenophyllum* Teeri *et al.* (1981)  
*Monanthes* Tenhunen *et al.* (1982)  
*Orostachys* Oyungerel *et al.* (2004)  
*Pachyphytum* Rundel *et al.* (1979)  
*Rosularia* Habibi and Hajiboland (2011)



|                       |                                                                                             |                                                                                                                                                                                                                                                                                                                                                                                                                                                                                                                                                                                                                                                                                                                                                          |
|-----------------------|---------------------------------------------------------------------------------------------|----------------------------------------------------------------------------------------------------------------------------------------------------------------------------------------------------------------------------------------------------------------------------------------------------------------------------------------------------------------------------------------------------------------------------------------------------------------------------------------------------------------------------------------------------------------------------------------------------------------------------------------------------------------------------------------------------------------------------------------------------------|
|                       | <i>Sedum</i> , including <i>Diamorpha</i>                                                   | Bennet-Clark (1933); Thomas and Ranson (1954); Holdsworth (1971); Kluge (1977); Rundel <i>et al.</i> (1979); Pilon-Smits <i>et al.</i> (1991); Teeri <i>et al.</i> (1981); Martin <i>et al.</i> (1982), as <i>Diamorpha smallii</i> Britton = <b><i>Sedum smallii</i></b> (Britton) H.E.Ahles                                                                                                                                                                                                                                                                                                                                                                                                                                                            |
|                       | <i>Sempervivum</i>                                                                          | de Saussure (1804); Warburg (1886); Astruc (1903); Nuernbergk (1961); Bender (1971); Osmond <i>et al.</i> (1975); Schuber and Kluge (1979); Ziegler (1979)                                                                                                                                                                                                                                                                                                                                                                                                                                                                                                                                                                                               |
|                       | <i>Umbilicus</i>                                                                            | Daniel <i>et al.</i> (1984)                                                                                                                                                                                                                                                                                                                                                                                                                                                                                                                                                                                                                                                                                                                              |
|                       | <i>Villadia</i>                                                                             | Teeri (1982)                                                                                                                                                                                                                                                                                                                                                                                                                                                                                                                                                                                                                                                                                                                                             |
| VITALES               |                                                                                             |                                                                                                                                                                                                                                                                                                                                                                                                                                                                                                                                                                                                                                                                                                                                                          |
| <b>Vitaceae</b>       |                                                                                             |                                                                                                                                                                                                                                                                                                                                                                                                                                                                                                                                                                                                                                                                                                                                                          |
| Vitoidaeae            | <i>Cissus</i>                                                                               | Milburn <i>et al.</i> (1968); Ziegler (1979); Ting <i>et al.</i> (1983); Virzo de Santo <i>et al.</i> (1983, 1987); Olivares <i>et al.</i> (1984); Kluge <i>et al.</i> (1995)                                                                                                                                                                                                                                                                                                                                                                                                                                                                                                                                                                            |
|                       | <i>Cyphostemma</i>                                                                          | Schütte <i>et al.</i> (1967), as <i>Cissus hypoleuca</i> Harv. = <b><i>Cyphostemma hypoleucum</i></b> (Harv.) Desc. ex Wild & R.B.Drumm.; Dittrich <i>et al.</i> (1973), as <i>Cissus digitata</i> Lam. = <b><i>Cyphostemma digitatum</i></b> (Lam.) Desc.; Mooney <i>et al.</i> (1977a); Ziegler (1979); Sternberg <i>et al.</i> (1984)                                                                                                                                                                                                                                                                                                                                                                                                                 |
| ZYGOPHYLLALES         |                                                                                             |                                                                                                                                                                                                                                                                                                                                                                                                                                                                                                                                                                                                                                                                                                                                                          |
| <b>Zygophyllaceae</b> |                                                                                             |                                                                                                                                                                                                                                                                                                                                                                                                                                                                                                                                                                                                                                                                                                                                                          |
| Larreoideae           | <i>Bulnesia</i>                                                                             | Mok <i>et al.</i> (2023)                                                                                                                                                                                                                                                                                                                                                                                                                                                                                                                                                                                                                                                                                                                                 |
| CUCURBITALES          |                                                                                             |                                                                                                                                                                                                                                                                                                                                                                                                                                                                                                                                                                                                                                                                                                                                                          |
| <b>Cucurbitaceae</b>  |                                                                                             |                                                                                                                                                                                                                                                                                                                                                                                                                                                                                                                                                                                                                                                                                                                                                          |
|                       | <i>Seyrigia</i>                                                                             | de Luca <i>et al.</i> (1977)                                                                                                                                                                                                                                                                                                                                                                                                                                                                                                                                                                                                                                                                                                                             |
|                       | <i>Xerosicyos</i>                                                                           | de Luca <i>et al.</i> (1977); Winter (1979); Rayder and Ting (1983a); Kluge <i>et al.</i> (1995)                                                                                                                                                                                                                                                                                                                                                                                                                                                                                                                                                                                                                                                         |
| ROSALES               |                                                                                             |                                                                                                                                                                                                                                                                                                                                                                                                                                                                                                                                                                                                                                                                                                                                                          |
| <b>Urticaceae</b>     |                                                                                             |                                                                                                                                                                                                                                                                                                                                                                                                                                                                                                                                                                                                                                                                                                                                                          |
|                       | <i>Pilea</i>                                                                                | Winter <i>et al.</i> (2021b)                                                                                                                                                                                                                                                                                                                                                                                                                                                                                                                                                                                                                                                                                                                             |
| MALPIGHIALES          |                                                                                             |                                                                                                                                                                                                                                                                                                                                                                                                                                                                                                                                                                                                                                                                                                                                                          |
| <b>Clusiaceae</b>     |                                                                                             |                                                                                                                                                                                                                                                                                                                                                                                                                                                                                                                                                                                                                                                                                                                                                          |
|                       | <i>Clusia</i>                                                                               | Hartenburg (1937); Tinoco-Ojanguren and Vázquez-Yanes (1983); Ting <i>et al.</i> (1985); Schmitt <i>et al.</i> (1988); Borland <i>et al.</i> (1992); Reinert <i>et al.</i> (1997); Zotz <i>et al.</i> (1999), as <i>Havetiopsis flexilis</i> Spruce ex Planch. & Triana = <b><i>Clusia flavida</i></b> (Benth.) Pipoly                                                                                                                                                                                                                                                                                                                                                                                                                                   |
|                       | <i>Adenia</i>                                                                               | Mooney <i>et al.</i> (1977a)                                                                                                                                                                                                                                                                                                                                                                                                                                                                                                                                                                                                                                                                                                                             |
| <b>Passifloraceae</b> |                                                                                             |                                                                                                                                                                                                                                                                                                                                                                                                                                                                                                                                                                                                                                                                                                                                                          |
| <b>Euphorbiaceae</b>  |                                                                                             |                                                                                                                                                                                                                                                                                                                                                                                                                                                                                                                                                                                                                                                                                                                                                          |
| Euphorbiodeae         | <i>Euphorbia</i> , including <i>Monadenium</i> , <i>Pedilanthus</i> , and <i>Synadenium</i> | Nuernbergk (1961); McWilliams (1970), as <i>Monadenium lugardiae</i> [ <i>Monodenium lugardae</i> ] N.E.Br. = <b><i>Euphorbia lugardiae</i></b> (N.E.Br.) Bruyns, <i>Pedilanthus tithymaloides</i> (L.) Poit. = <b><i>Euphorbia tithymaloides</i></b> L., <i>Synadenium cupulare</i> [ <i>capulare</i> ] (Boiss.) L.C.Wheeler ex A.C.White, R.A.Dyer & B.Sloane = <b><i>Euphorbia cupularis</i></b> Boiss., and <i>Synadenium grantii</i> Hook.f. = <b><i>Euphorbia umbellata</i></b> (Pax) Bruyns; Sen (1970); Bender (1971); Sen <i>et al.</i> (1971); Dittrich <i>et al.</i> (1973); Schulze <i>et al.</i> (1976); Mooney <i>et al.</i> (1977a); Winter (1979); Sternberg <i>et al.</i> (1984); Kluge <i>et al.</i> (1995); Horn <i>et al.</i> (2014) |
| Crotonoideae          | <i>Jatropha</i>                                                                             | Winter and Holtum (2015)                                                                                                                                                                                                                                                                                                                                                                                                                                                                                                                                                                                                                                                                                                                                 |

## GERANIALES

**Geraniaceae***Monsonia*Schütte *et al.* (1967), as *Sarcocaulon patersonii* (DC.) G. Don = ***Monsonia patersonii*** DC.*Pelargonium*Schütte *et al.* (1967); Mooney *et al.* (1977a); Kluge and Ting (1978); Jones *et al.* (2003)

## CARYOPHYLLALES

**Aizoaceae**

## Aizoioideae

*Tetragonia*Schütte *et al.* (1967); Mooney *et al.* (1977a); Messerschmid *et al.* (2021)

## Mesembryanthemoideae

*Mesembryanthemum*, including  
*Aptenia*, *Aridaria*, *Aspazoma*,  
*Brownanthus*, *Opophytum*,  
*Phyllobolus*, *Prenia*,  
*Psilocaulon*, *Sceletium*,  
*Sphalmanthus*, and  
*Synaptophyllum*Warburg (1886); Bendrat (1929); Schütte *et al.* (1967); Treichel (1975), as *Aptenia cordifolia* (L.f.) Schwantes = ***Mesembryanthemum cordifolium*** L.f.; Mooney *et al.* (1977a), as *Psilocaulon kuntzei* (Schinz) Dinter & Schwantes = ***Mesembryanthemum kuntzei*** Schinz; von Willert *et al.* (1977), as *Aridaria* sp. = ***Mesembryanthemum*** sp., *Aspazoma amplexens* (L.Bolus) N.E.Br. = ***Mesembryanthemum amplexens*** L.Bolus, *Prenia relaxata* (Willd. ex Schweigg.) N.E.Br. = ***Mesembryanthemum pallens*** Aiton, *Sceletium* [cf.] *joubertii* L.Bolus = ***Mesembryanthemum tortuosum*** L., and *Sphalmanthus micans* L.Bolus = ***Mesembryanthemum resurgens*** Kensit; von Willert *et al.* (1992) as *Opophytum aquosum* (L.Bolus) N.E.Br. = ***Mesembryanthemum hypertrophicum*** Dinter; Rundel *et al.* (1999), as *Brownanthus nucifer* (Ihlenf. & Bittrich) Pierce & Gerbaulet = ***Mesembryanthemum nucifer*** (Ihlenf. & Bittrich) Klak, *Phyllobolus sinuosus* (L.Bolus) = ***Mesembryanthemum sinuosum*** L.Bolus, and *Synaptophyllum juttiae* (Dinter & A.Berger) N.E.Br. = ***Mesembryanthemum juttiae*** Dinter & A.Berger  
Rundel *et al.* (1999) and Winter (2019), as *Ruschia hexamera* L.Bolus = ***Antimima paripetala*** (L.Bolus) Klak; Messerschmid *et al.* (2021)  
von Willert *et al.* (1977)  
Rundel *et al.* (1999)  
Nuernbergk (1961); Winter (2019)  
Bonner and Bonner (1948), as *Mesembryanthemum edule* L. = ***Carpobrotus edulis*** (L.) N.E.Br.; Winter (1973); Treichel and Bauer (1974); Winter (2019)  
Winter (2019)  
Matimati *et al.* (2012); Winter (2019)  
Winter (2019)  
Rundel *et al.* (1999)  
Schütte *et al.* (1967); Rundel *et al.* (1999)  
Herppich and Herppich (1996); Winter (2019)  
Winter *et al.* (1981); Winter (2019)  
Rundel *et al.* (1999)  
von Willert *et al.* (1977), as *Anisocalyx vaginatus* (L.Bolus) L.Bolus = ***Drosanthemopsis vaginata*** (L.Bolus) Rauschert  
von Willert *et al.* (1977, 1980); Martin *et al.* (1988); Rundel *et al.* (1999)  
Mooney *et al.* (1977a), as *Ruschia sedoides* (Dinter & A.Berger) Friedrich = ***Eberlanzia sedoides*** (Dinter & A.Berger) Schwantes; Messerschmid *et al.* (2021)

## Ruschioideae

*Antimima**Argyroderma**Astridia**Bergeranthus**Carpobrotus**Carruanthus**Cephalophyllum**Chasmatoophyllum**Cheiridopsis**Conophytum**Delosperma**Disphyma**Dracophilus**Drosanthemopsis*, including*Anisocalyx**Drosanthemum**Eberlanzia*

|                                 |                                                                                                                                                                                                                                                                                                                                                                                |
|---------------------------------|--------------------------------------------------------------------------------------------------------------------------------------------------------------------------------------------------------------------------------------------------------------------------------------------------------------------------------------------------------------------------------|
| <i>Erepsia</i>                  | Winter (2019)                                                                                                                                                                                                                                                                                                                                                                  |
| <i>Faucaria</i>                 | Nuernbergk (1961); Winter (2019)                                                                                                                                                                                                                                                                                                                                               |
| <i>Fenestraria</i>              | K. Winter (unpublished) <sup>2</sup> : <i>Fenestraria rhopalophylla</i> (Schltr. & Diels) N.E.Br.                                                                                                                                                                                                                                                                              |
| <i>Glottiphyllum</i>            | Kraus (1883), as <i>Mesembryanthemum adscendens</i> Haw. = <b><i>Glottiphyllum longum</i></b> (Haw.) N.E.Br.; Winter (2019)                                                                                                                                                                                                                                                    |
| <i>Hartmanthus</i>              | von Willert <i>et al.</i> (1992), as <i>Delosperma pergamentaceum</i> L.Bolus = <b><i>Hartmanthus pergamentaceus</i></b> (L.Bolus) S.A.Hammer                                                                                                                                                                                                                                  |
| <i>Hereroa</i>                  | Winter (2019)                                                                                                                                                                                                                                                                                                                                                                  |
| <i>Jacobsenia</i>               | von Willert <i>et al.</i> (1977)                                                                                                                                                                                                                                                                                                                                               |
| <i>Jordaaniella</i>             | Winter (2019), as <i>Cephalophyllum cupreum</i> L.Bolus = <b><i>Jordaaniella cuprea</i></b> (L.Bolus) H.E.K.Hartmann                                                                                                                                                                                                                                                           |
| <i>Lampranthus</i>              | von Willert <i>et al.</i> (1977); Winter (2019)                                                                                                                                                                                                                                                                                                                                |
| <i>Lithops</i>                  | Schütte <i>et al.</i> (1967); Holdsworth (1971); Dittrich <i>et al.</i> (1973); Cockburn (1974); Troughton <i>et al.</i> (1974)                                                                                                                                                                                                                                                |
| <i>Malephora</i>                | von Willert <i>et al.</i> (1977); Veste and Herppich (2021)                                                                                                                                                                                                                                                                                                                    |
| <i>Meyerophytum</i>             | von Willert <i>et al.</i> (1977), as <i>Monilaria globosa</i> (L.Bolus) L.Bolus = <b><i>Meyerophytum globosum</i></b> (L.Bolus) Ihlenf.                                                                                                                                                                                                                                        |
| <i>Mitrophyllum</i>             | von Willert <i>et al.</i> (1977)                                                                                                                                                                                                                                                                                                                                               |
| <i>Monilaria</i>                | Veste <i>et al.</i> (2001)                                                                                                                                                                                                                                                                                                                                                     |
| <i>Oscularia</i>                | Winter (2019), as <i>Lampranthus lunatus</i> (Willd.) N.E.Br. = <b><i>Oscularia lunata</i></b> (Willd.) H.E.K.Hartmann                                                                                                                                                                                                                                                         |
| <i>Pleiospilos</i>              | Winter (2019)                                                                                                                                                                                                                                                                                                                                                                  |
| <i>Prepodesma</i> <sup>14</sup> | Winter (2019), as <i>Nananthus orpenii</i> (N.E.Br.) L.Bolus = <b><i>Prepodesma orpenii</i></b> (N.E.Br.) N.E.Br.                                                                                                                                                                                                                                                              |
| <i>Psammophora</i>              | Rundel <i>et al.</i> (1999)                                                                                                                                                                                                                                                                                                                                                    |
| <i>Rabiea</i>                   | Kraus (1883), as <i>Mesembryanthemum albinotum</i> Haw. = <b><i>Rabiea albinota</i></b> (Haw.) N.E.Br.                                                                                                                                                                                                                                                                         |
| <i>Rhinophyllum</i>             | Winter (2019)                                                                                                                                                                                                                                                                                                                                                                  |
| <i>Ruschia</i>                  | Kraus (1883), as <i>Mesembryanthemum maximum</i> Haw. = <b><i>Ruschia maxima</i></b> (Haw.) L.Bolus; Warburg (1886), as <i>Mesembryanthemum [anthelminticum]</i> Dinter = <b><i>Ruschia axthelmiana</i></b> (Dinter) Schwantes, and <i>Mesembryanthemum [multiflos]</i> Haw. = <b><i>Ruschia multiflora</i></b> (Haw.) Schwantes; Matimati <i>et al.</i> (2012); Winter (2019) |
| <i>Sarcozona</i> <sup>15</sup>  | J.A.M. Holtum (unpublished): <i>Sarcozona praecox</i> (F.Muell.) S.T.Blake                                                                                                                                                                                                                                                                                                     |
| <i>Schlechteranthus</i>         | Messerschmid <i>et al.</i> (2021)                                                                                                                                                                                                                                                                                                                                              |
| <i>Stoeberia</i>                | von Willert <i>et al.</i> (1977, 1983); Rundel <i>et al.</i> (1999)                                                                                                                                                                                                                                                                                                            |
| <i>Titanopsis</i>               | Bender <i>et al.</i> (1973); Winter (2019)                                                                                                                                                                                                                                                                                                                                     |
| <i>Trichodiadema</i>            | Schütte <i>et al.</i> (1967); Winter (2019)                                                                                                                                                                                                                                                                                                                                    |
| <i>Vanheerdea</i>               | von Willert <i>et al.</i> (1977)                                                                                                                                                                                                                                                                                                                                               |
| Sesuvioideae                    | <i>Sesuvium</i>                                                                                                                                                                                                                                                                                                                                                                |
|                                 | <i>Trianthema</i>                                                                                                                                                                                                                                                                                                                                                              |
| PORTULACINEAE                   |                                                                                                                                                                                                                                                                                                                                                                                |
| <b>Montiaceae</b>               | Australian <i>Calandrinia</i> <sup>16</sup>                                                                                                                                                                                                                                                                                                                                    |
|                                 | <i>Calyptridium</i>                                                                                                                                                                                                                                                                                                                                                            |
|                                 | <i>Cistanthe</i>                                                                                                                                                                                                                                                                                                                                                               |
|                                 | Winter <i>et al.</i> (1981); Guralnick and Jackson (2001); Winter and Holtum (2011); Hancock <i>et al.</i> (2019)                                                                                                                                                                                                                                                              |
|                                 | Guralnick and Jackson (2001)                                                                                                                                                                                                                                                                                                                                                   |
|                                 | Mooney <i>et al.</i> (1974), as <i>Calandrinia maritima</i> Nutt. = <b><i>Cistanthe maritima</i></b> (Nutt.) Carolin ex Hershk.; Kluge and Ting (1978), as <i>Talinum guadalupense</i> M.G.Dudley = <b><i>Cistanthe guadalupensis</i></b> (M.G.Dudley) Carolin ex Hershk.; Arroyo <i>et al.</i> (1990), as <i>Philippiamra celosioides</i> (Phil.)                             |

|                                |                                                      |                                                                                                                                                                                                                                                                                                                                                                                                                                                                                                                        |
|--------------------------------|------------------------------------------------------|------------------------------------------------------------------------------------------------------------------------------------------------------------------------------------------------------------------------------------------------------------------------------------------------------------------------------------------------------------------------------------------------------------------------------------------------------------------------------------------------------------------------|
|                                |                                                      | Kuntze = <i>Cistanthe celosioides</i> (Phil.) Carolin ex Hershk.; Holtum <i>et al.</i> (2021)                                                                                                                                                                                                                                                                                                                                                                                                                          |
|                                | <i>Claytonia</i>                                     | Guralnick and Jackson (2001), as <i>Montia perfoliata</i> (Donn ex Willd.) Howell = <i>Claytonia perfoliata</i> Donn ex Willd.                                                                                                                                                                                                                                                                                                                                                                                         |
|                                | <i>Lewisia</i>                                       | Guralnick and Jackson (2001)                                                                                                                                                                                                                                                                                                                                                                                                                                                                                           |
|                                | <i>Phemeranthus</i>                                  | Martin <i>et al.</i> (1982), as <i>Talinum teretifolium</i> Pursh = <i>Phemeranthus teretifolius</i> (Pursh) Raf.; Martin and Zee (1983), as <i>Talinum calycinum</i> Engelm. = <i>Phemeranthus calycinus</i> (Engelm.) Kiger; Harris and Martin (1991), as <i>Talinum calcaricum</i> S.Ware = <i>Phemeranthus calcaricus</i> (S.Ware) Kiger, as <i>Talinum mengesii</i> W.Wolf = <i>Phemeranthus mengesii</i> (W.Wolf) Kiger, and as <i>Talinum parviflorum</i> Nutt. = <i>Phemeranthus parviflorus</i> (Nutt.) Kiger |
| <b>Didiereaceae</b>            |                                                      |                                                                                                                                                                                                                                                                                                                                                                                                                                                                                                                        |
| Didiereoideae                  | <i>Alluaudia</i>                                     | Kluge and Ting (1978); Winter (1979); Sternberg <i>et al.</i> (1984); Kluge <i>et al.</i> (1995)                                                                                                                                                                                                                                                                                                                                                                                                                       |
|                                | <i>Alluaudiopsis</i>                                 | Winter (1979)                                                                                                                                                                                                                                                                                                                                                                                                                                                                                                          |
|                                | <i>Decarya</i>                                       | Winter (1979); Kluge <i>et al.</i> (1995)                                                                                                                                                                                                                                                                                                                                                                                                                                                                              |
|                                | <i>Didierea</i>                                      | Kluge and Ting (1978); Winter (1979); Kluge <i>et al.</i> (1995)                                                                                                                                                                                                                                                                                                                                                                                                                                                       |
| Portulacarioideae              | <i>Portulacaria</i> , including <i>Ceraria</i>       | Schütte <i>et al.</i> (1967); Neales (1975); Mooney <i>et al.</i> (1977a); Ting and Hanscom (1977); von Willert <i>et al.</i> (1992) and Veste <i>et al.</i> (2001), as <i>Ceraria fruticulosa</i> H.Pearson & Stephens = <i>Portulacaria fruticulosa</i> (H.Pearson & Stephens) Bruyns & Klak; Guralnick and Gladsky (2017)                                                                                                                                                                                           |
| <b>Basellaceae</b>             | <i>Anredera</i>                                      | Holtum <i>et al.</i> (2018)                                                                                                                                                                                                                                                                                                                                                                                                                                                                                            |
|                                | <i>Basella</i>                                       | Sikolia <i>et al.</i> (2008); Winter (2019)                                                                                                                                                                                                                                                                                                                                                                                                                                                                            |
| <b>Halophytaceae</b>           | <i>Halophytum</i> <sup>17</sup>                      | This publication: <i>Halophytum ameghinoi</i> (Speg.) Speg.                                                                                                                                                                                                                                                                                                                                                                                                                                                            |
| <b>Talinaceae</b>              | <i>Talinum</i>                                       | Ting (1989); Herrera <i>et al.</i> (1991); Güerere <i>et al.</i> (1996); Taisma and Herrera (1998); Guralnick and Jackson (2001); Brillhaus <i>et al.</i> (2016)                                                                                                                                                                                                                                                                                                                                                       |
| <b>Portulacaceae</b>           | <i>Portulaca</i>                                     | Koch and Kennedy (1980, 1982); Ku <i>et al.</i> (1981); Kraybill <i>et al.</i> (1996); Guralnick and Jackson (2001); Guralnick <i>et al.</i> (2002); Lara <i>et al.</i> (2004); Holtum <i>et al.</i> (2017); Winter <i>et al.</i> (2019b); Gilman <i>et al.</i> (2022)                                                                                                                                                                                                                                                 |
| <b>Anacampserotaceae</b>       | <i>Anacampseros</i>                                  | Schütte <i>et al.</i> (1967); Mooney <i>et al.</i> (1977a); Kluge and Ting (1978); Sternberg <i>et al.</i> (1984); Guralnick and Jackson (2001); Guralnick <i>et al.</i> (2008)                                                                                                                                                                                                                                                                                                                                        |
|                                | <i>Grahamia</i>                                      | Guralnick <i>et al.</i> (2008)                                                                                                                                                                                                                                                                                                                                                                                                                                                                                         |
|                                | <i>Talinopsis</i>                                    | Guralnick and Jackson (2001)                                                                                                                                                                                                                                                                                                                                                                                                                                                                                           |
| <b>Cactaceae</b> <sup>18</sup> |                                                      |                                                                                                                                                                                                                                                                                                                                                                                                                                                                                                                        |
| Cactoideae                     | <i>Acanthocereus</i>                                 | Díaz and Medina (1984); Mooney <i>et al.</i> (1989), as <i>Peniocereus rosei</i> J.G.Ortega = <i>Acanthocereus rosei</i> (J.G.Ortega) Lodé; Ricalde <i>et al.</i> (2010); Santiago <i>et al.</i> (2017)                                                                                                                                                                                                                                                                                                                |
|                                | <i>Bergerocactus</i>                                 | Mooney <i>et al.</i> (1974)                                                                                                                                                                                                                                                                                                                                                                                                                                                                                            |
|                                | <i>Carnegiea</i>                                     | Long (1915); Richards (1915); Despain <i>et al.</i> (1970); Nobel and Hartsock (1986); English <i>et al.</i> (2007); Hultine <i>et al.</i> (2016, 2019); Huber <i>et al.</i> (2018)                                                                                                                                                                                                                                                                                                                                    |
|                                | <i>Cephalocereus</i> , including <i>Neobuxbaumia</i> | Hultine <i>et al.</i> (2016), as <i>Neobuxbau[n]mia polylopha</i> (DC.) Backeb. = <i>Cephalocereus polylophus</i> (DC.) Britton & Rose                                                                                                                                                                                                                                                                                                                                                                                 |

- Cereus*, including *Subpilocereus* Díaz de Arends (1984), as *Subpilocereus repandus* (L.) Backeb. = ***Cereus repandus*** (L.) Mill.; Nobel *et al.* (1984); Nobel (1988); Lüttge *et al.* (1989a), as *Subpilocereus ottonis* Backeb. = ***Cereus horrispinus*** Backeb.; Llano and Ugan (2014)
- Chamaecereus* Troughton *et al.* (1974b); Seeni and Gnanam (1980), as *Cereus s[y]ilvestrii* Speg. = ***Chamaecereus silvestrii*** (Speg.) Britton & Rose
- Cleistocactus* Hultine *et al.* (2016)
- Cochemiea* Richards (1915), as *Mammillaria grahamii* Engelm. = ***Cochemiea grahamii*** (Engelm.) Doweld; Ting and Dugger (1968), as *Mammillaria tetrancistra* Engelm. = ***Cochemiea tetrancistra*** (Engelm.) P.B.Breslin; Mooney *et al.* (1974), as *Mammillaria dioica* K.Brandege = ***Cochemiea dioica*** (K.Brandege) Doweld, and *Mammillaria louisae* G.E.Linds. = ***Cochemiea hutchisoniana*** (H.E.Gates) P.B.Breslin & Majure ssp. *louisae* (G.E.Linds.) Majure
- Copiapoa*, including *Pilocopiapoa* Mooney *et al.* (1974), including *Pilocopiapoa solaris* F.Ritter = ***Copiapoa solaris*** (F.Ritter) F.Ritter; Mooney *et al.* (1977b); Ziegler (1996)
- Disocactus* Nuernbergk (1961), as *Phyllocactus pfersdorffii* Rümpler = ***Disocactus crenatus*** (Lindl.) M.Á.Cruz & S.Arias ssp. *kinnachii* (Bravo) M.Á.Cruz & S.Arias; Tinoco-Ojanguren and Vázquez-Yanes (1983), as *Epiphyllum crenatum* (Lindl.) G.Don = ***Disocactus crenatus*** (Lindl.) M.Á.Cruz & S.Arias
- Echinocactus* Rivera and Smith (1979)
- Echinocereus* Ting and Dugger (1968); Mooney *et al.* (1974)
- Echinopsis* Nuernbergk (1961); Hultine *et al.* (2016)
- Epiphyllum* Smith *et al.* (1985); Zotz and Ziegler (1997)
- Eriosyce*, including *Neochilena* Mooney *et al.* (1974), as [*Neochilena*] *chilensis* (Hildm. ex K.Schum.) Backeb. = ***Eriosyce chilensis*** (Hildm. ex K.Schum.) Katt.
- Escontria* Hernández-González and Briones Villareal (2007)
- Eulychnia* Mooney *et al.* (1974); Ziegler (1996)
- Ferocactus* Long (1915), as *Echinocactus wislizeni* Engelm. = ***Ferocactus wislizeni*** (Engelm.) Britton & Rose; Patten and Dinger (1969); Mooney *et al.* (1974); Nobel (1977)
- Haageocereus* Hultine *et al.* (2016)
- Hatiora* Winter (2019)
- Leucostele* Mooney *et al.* (1974) as *Trichocereus chiloensis* (Colla) Britton & Rose = ***Leucostele chiloensis*** (Colla) Schlumpb., and *Trichocereus coquimbanus* (Molina) Britton & Rose = ***Leucostele nigripilis*** (Phil.) P.C.Guerrero & Helmut Walter; Ziegler (1996) as *Echinopsis chiloensis* (Colla) H.Friedrich & G.D.Rowley = ***Leucostele chiloensis*** (Colla) Schlumpb., and *Echinopsis skottsbergii* (Backeb.) H.Friedrich & G.D.Rowley = ***Leucostele skottsbergii*** (Backeb.) P.C.Guerrero & Helmut Walter
- Lobivia* Troughton *et al.* (1974b)
- Lophocereus* Mooney *et al.* (1974); Hultine *et al.* (2016), as *Pachycereus gatesii* (M.E.Jones) D.R.Hunt = ***Lophocereus gatesii*** M.E.Jones; Huber *et al.* (2018)
- Lophophora* Ibara-Laclette *et al.* (2015)
- Mammillaria* Nuernbergk (1961)
- Melocactus* Ting (1976); Díaz de Arends (1984)

|                                                                               |                                                                                                                                                                                                                                                                                                                                                                                                                                                                                                                                                                                 |
|-------------------------------------------------------------------------------|---------------------------------------------------------------------------------------------------------------------------------------------------------------------------------------------------------------------------------------------------------------------------------------------------------------------------------------------------------------------------------------------------------------------------------------------------------------------------------------------------------------------------------------------------------------------------------|
| <i>Myrtillocactus</i>                                                         | Mooney <i>et al.</i> , (1974); de la Rosa-Manzano <i>et al.</i> (2016)                                                                                                                                                                                                                                                                                                                                                                                                                                                                                                          |
| <i>Oreocereus</i>                                                             | Hultine <i>et al.</i> (2016)                                                                                                                                                                                                                                                                                                                                                                                                                                                                                                                                                    |
| <i>Oroya</i>                                                                  | Keeley and Keeley (1989)                                                                                                                                                                                                                                                                                                                                                                                                                                                                                                                                                        |
| <i>Pachycereus</i>                                                            | Mooney <i>et al.</i> (1974); Troughton <i>et al.</i> (1974b); Ricalde <i>et al.</i> (2010), as <i>Stenocereus eichlamii</i> (Britton & Rose) Buxb. = <b><i>Pachycereus eichlamii</i></b> (Britton & Rose) D.R.Hunt; Hultine <i>et al.</i> (2016); Huber <i>et al.</i> (2018)                                                                                                                                                                                                                                                                                                    |
| <i>Parodia</i> , including <i>Notocactus</i>                                  | Troughton <i>et al.</i> (1974b), as <i>Notocactus mammulosus</i> (Lem.) A.Berger = <b><i>Parodia mammulosa</i></b> (Lem.) N.P.Taylor                                                                                                                                                                                                                                                                                                                                                                                                                                            |
| <i>Peleciphora</i>                                                            | Rivera and Smith (1979), Nobel (1981), and Nobel and Hartsock (1986), as <i>Coryphantha vivipara</i> (Nutt.) Britton & Rose = <b><i>Peleciphora vivipara</i></b> (Nutt.) D.Aquino & Dan.Sánchez                                                                                                                                                                                                                                                                                                                                                                                 |
| <i>Pilosocereus</i>                                                           | Ting (1976), as <i>Cephalocereus royenii</i> (L.) Britton & Rose = <b><i>Pilosocereus polygonus</i></b> (Lam.) Byles & G.D.Rowley; Mooney <i>et al.</i> (1989), as <i>Cephalocereus purpusii</i> Britton & Rose = <b><i>Pilosocereus purpusii</i></b> (Britton & Rose) Byles & G.D.Rowley; Ting (1989); Ricalde <i>et al.</i> (2010); Santiago <i>et al.</i> (2017)                                                                                                                                                                                                             |
| <i>Polaskia</i>                                                               | Hultine <i>et al.</i> (2016)                                                                                                                                                                                                                                                                                                                                                                                                                                                                                                                                                    |
| <i>Rhipsalis</i>                                                              | Dittrich <i>et al.</i> (1973); Smith <i>et al.</i> (1985); Kluge <i>et al.</i> (1995); Ocampo and Columbus (2010)                                                                                                                                                                                                                                                                                                                                                                                                                                                               |
| <i>Schlumbergera</i> , including <i>Zygocactus</i>                            | Nuernbergk (1961), Bender <i>et al.</i> (1973), Dittrich <i>et al.</i> (1973), Hanscom and Ting (1978), and Sternberg <i>et al.</i> (1984), as <i>Zygocactus truncatus</i> (Haw.) K.Schum. = <b><i>Schlumbergera truncata</i></b> (Haw.) Moran                                                                                                                                                                                                                                                                                                                                  |
| <i>Sclerocactus</i>                                                           | Oeschger and Lerman (1970), as <i>Neolloydia intertexta</i> (Engelm.) L.D.Benson = <b><i>Sclerocactus intertextus</i></b> (Engelm.) N.P.Taylor; Rivera and Smith (1979), as <i>Echinomastus intertextus</i> (Engelm.) Britton & Rose = <b><i>Sclerocactus intertextus</i></b> (Engelm.) N.P.Taylor                                                                                                                                                                                                                                                                              |
| <i>Selenicereus</i> , including <i>Hylocereus</i>                             | Smith <i>et al.</i> (1985), as <i>Hylocereus lemairei</i> (Hook.) Britton & Rose = <b><i>Selenicereus monacanthus</i></b> (Lem.) D.R.Hunt; Mooney <i>et al.</i> (1989), Santiago <i>et al.</i> (2017), and Wang <i>et al.</i> (2019) as <i>Hylocereus undatus</i> (Haw.) Britton & Rose = <b><i>Selenicereus undatus</i></b> (Haw.) D.R.Hunt; Ting (1989), as <i>Hylocereus [trigonatus] trigonus</i> (Haw.) Saff. = <b><i>Selenicereus triangularis</i></b> (L.) D.R.Hunt; Ricalde <i>et al.</i> (2010)                                                                        |
| <i>Stenocereus</i> , including <i>Machaerocereus</i> and <i>Ritterocereus</i> | Bender (1971), as <i>Cereus peruvianus</i> C.F.Först. = <b><i>Stenocereus griseus</i></b> (Haw.) Buxb.; Mooney <i>et al.</i> (1974), as <i>Machaerocereus gummosus</i> (Engelm.) Britton & Rose = <b><i>Stenocereus gummosus</i></b> (Engelm.) A.C.Gibson & K.E.Horak; Díaz de Arends (1984), as <i>Ritterocereus griseus</i> (Haw.) Backeb.= <b><i>Stenocereus griseus</i></b> (Haw.) Buxb.; Ting (1989), as <i>Lemaireocereus hystrix</i> (Haw.) Britton & Rose = <b><i>Stenocereus heptagonus</i></b> (L.) Mottram; Hultine <i>et al.</i> (2016); Huber <i>et al.</i> (2018) |
| <i>Stetsonia</i>                                                              | Hultine <i>et al.</i> (2016)                                                                                                                                                                                                                                                                                                                                                                                                                                                                                                                                                    |
| <i>Trichocereus</i>                                                           | Mooney <i>et al.</i> (1974), as <i>Eulychnia spinibarbis</i> (Otto ex Pfeiff.) Britton & Rose = <b><i>Trichocereus spinibarbis</i></b> (Otto ex Pfeiff.) F.Ritter                                                                                                                                                                                                                                                                                                                                                                                                               |
| <i>Turbincarpus</i>                                                           | de la Rosa-Manzano <i>et al.</i> (2016)                                                                                                                                                                                                                                                                                                                                                                                                                                                                                                                                         |
| Opuntioideae<br><i>Austrocylindropuntia</i>                                   | Thomas and Ranson (1954), as <i>Opuntia cylindrica</i> DC. = <b><i>Austrocylindropuntia cylindrica</i></b> (Lam.) Backeb.; Nobel and Hartsock (1986); Keeley and Keeley (1989), as                                                                                                                                                                                                                                                                                                                                                                                              |

- Tephrocactus floccosus* (Salm-Dyck) Backeb. =  
***Austrocylindropuntia floccosa*** (Salm-Dyck) F.Ritter;  
Martin and Wallace (2000)
- Consolea* Ting (1976, 1989), as *Opuntia rubescens* Salm-Dyck ex DC. =  
***Consolea rubescens*** (Salm-Dyck ex DC.) Lem.
- Cylindropuntia* Spoehr (1913), as *Opuntia versicolor* Engelm. ex J.M.Coult. =  
***Cylindropuntia thurberi*** (Engelm.) F.M.Knuth ssp.  
*versicolor* (Engelm. ex J.M.Coult.) M.A.Baker; Richards  
(1915), as *Opuntia leptocaulis* DC. = ***Cylindropuntia***  
***leptocaulis*** (DC.) F.M.Knuth; Ting and Dugger (1968), as  
*Opuntia echinocarpa* Engelm. & J.M.Bigelow =  
***Cylindropuntia echinocarpa*** (Engelm. & J.M.Bigelow)  
F.M.Knuth; Patten and Dinger (1969) and Sutton *et al.*  
(1976), as *Opuntia acanthocarpa* Engelm. & J.M.Bigelow =  
***Cylindropuntia acanthocarpa*** (Engelm. & J.M.Bigelow)  
F.M.Knuth; Mooney *et al.* (1974), as *Opuntia fulgida*  
Engelm. = ***Cylindropuntia fulgida*** (Engelm.) F.M.Knuth,  
and *Opuntia prolifera* Engelm. = ***Cylindropuntia prolifera***  
(Engelm.) F.M.Knuth; Rivera and Smith (1979), as *Opuntia*  
*imbricata* (Haw.) DC. = ***Cylindropuntia imbricata*** (Haw.)  
F.M.Knuth; Hultine *et al.* (2016)
- Grusonia* Hultine *et al.* (2016)
- Maihueniopsis* Mooney *et al.* (1974), as *Opuntia ovata* Pfeiff. =  
***Maihueniopsis ovata*** (Pfeiff.) F.Ritter; Llano and Ugan  
(2014)
- Opuntia*, including *Nopalea* de Saussure (1804); Richards (1915); Spoehr (1919); Master  
(1959); Kausch (1965); Ting and Dugger (1968); Osmond *et al.*  
(1973); Szarek *et al.* (1973); Mooney *et al.* (1974);  
Nisbet and Patten (1974); Sutton *et al.* (1976); Ziegler  
(1979); Díaz de Arends (1984); Mooney *et al.* (1989), as  
*Nopalea karwinskiana* (Salm-Dyck) K.Schum. = ***Opuntia***  
***karwinskiana*** Salm-Dyck; Ting (1989), as *Nopalea*  
[*cochinellifera*] *cochinellifera* (L.) Salm-Dyck = ***Opuntia***  
***cochinellifera*** (L.) Mill.; Ocampo and Columbus (2010);  
Ricalde *et al.* (2010); Santiago *et al.* (2017), as *Nopalea*  
*gaumeri* Britton & Rose = ***Opuntia inaperta*** (Schott ex  
Griffiths) D.R.Hunt
- Pereskioopsis* Nobel and Hartsock (1986); Martin and Wallace (2000);  
Ricalde *et al.* (2010)
- Pterocactus* Llano and Ugan (2014)
- Quiabentia* Nobel and Hartsock (1986); Martin and Wallace (2000)
- Tephrocactus* Bender (1971), as *Opuntia strobiliformis* A.Berger =  
***Tephrocactus articulatus*** (Pfeiff.) Backeb.
- Pereskioideae *Maihuenia* Nobel and Hartsock (1986); Martin and Wallace (2000);  
Ocampo and Columbus (2010); Llano and Ugan (2014)
- Pereskia*<sup>19</sup> Rayder and Ting (1981); Díaz and Medina (1984); Martin  
and Wallace (2000); Edwards and Diaz (2006); Ocampo  
and Columbus (2010)
- GENTIANALES
- Rubiaceae**
- Rubioideae *Hydnophytum* Winter *et al.* (1983); Holtum *et al.* (2016)
- Myrmecodia* Winter *et al.* (1983); Tsen and Holtum (2012)
- Squamellaria* Chomicki and Renner (2016)
- Apocynaceae**
- Apocynoideae *Pachypodium* von Willert *et al.* (1980, 1992)

|                       |                                                                     |                                                                                                                                                                                                                                                                                                                                                                                                                                   |
|-----------------------|---------------------------------------------------------------------|-----------------------------------------------------------------------------------------------------------------------------------------------------------------------------------------------------------------------------------------------------------------------------------------------------------------------------------------------------------------------------------------------------------------------------------|
| Asclepiadoideae       | <i>Apteranthes</i>                                                  | Lange <i>et al.</i> (1975) and Winter <i>et al.</i> (1976), as <i>Caralluma negevensis</i> D.Zohary = <i>Apteranthes europaea</i> (Guss.) Murb. <b>var. judaica</b> (Zohary) Plowes                                                                                                                                                                                                                                               |
|                       | <i>Boucerosia</i> , including <i>Frerea</i>                         | Lange and Zuber (1977), as <i>Frerea indica</i> Dalzell = <i>Boucerosia frerei</i> (G.D.Rowley) Meve & Liede; Reddy and Das (1978), as <i>Caralluma lasiantha</i> (Wight) N.E.Br. = <i>Boucerosia umbellata</i> (Haw.) Wight & Arn.                                                                                                                                                                                               |
|                       | <i>Caralluma</i>                                                    | Masrahi <i>et al.</i> (2012)                                                                                                                                                                                                                                                                                                                                                                                                      |
|                       | <i>Caudanthera</i>                                                  | Masrahi <i>et al.</i> (2012), as <i>Caralluma edulis</i> (Edgew.) Benth. ex Hook.f. = <i>Caudanthera edulis</i> (Edgew.) Meve & Liede                                                                                                                                                                                                                                                                                             |
|                       | <i>Ceropegia</i> <sup>20</sup>                                      | Warburg (1886), as [ <i>Calopegia</i> ]; Schütte <i>et al.</i> (1967); Ziegler <i>et al.</i> (1981)                                                                                                                                                                                                                                                                                                                               |
|                       | <i>Cynanchum</i> , including <i>Folotsia</i> and <i>Sarcostemma</i> | Schulze <i>et al.</i> (1976) and Rundel <i>et al.</i> (1999), as <i>Sarcostemma viminalis</i> (L.) R.Br. = <i>Cynanchum viminalis</i> (L.) L.; Winter <i>et al.</i> (1981), as <i>Sarcostemma australe</i> R.Br. = <i>Cynanchum viminalis</i> (L.) L. <b>ssp. australe</b> (R.Br.) Meve & Liede; Kluge <i>et al.</i> (1995), as <i>Folotsia madagascariensis</i> (Jum. & H.Perrier) Desc. = <i>Cynanchum toliari</i> Liede & Meve |
|                       | <i>Desmidorchis</i>                                                 | Masrahi <i>et al.</i> (2011, 2012), as <i>Caralluma acutangula</i> (Decne.) N.E.Br. = <i>Desmidorchis retrospiciens</i> Ehrenb.                                                                                                                                                                                                                                                                                                   |
|                       | <i>Dischidia</i>                                                    | Winter <i>et al.</i> (1983); Treseder <i>et al.</i> (1995); Martin <i>et al.</i> (2009)                                                                                                                                                                                                                                                                                                                                           |
|                       | <i>Duvalia</i>                                                      | Masrahi <i>et al.</i> (2015)                                                                                                                                                                                                                                                                                                                                                                                                      |
|                       | <i>Hoodia</i>                                                       | Schulze <i>et al.</i> (1976); Mooney <i>et al.</i> (1977a), as <i>Trichocaulon pedicellatum</i> Schinz = <i>Hoodia pedicellata</i> (Schinz) Plowes                                                                                                                                                                                                                                                                                |
|                       | <i>Hoya</i>                                                         | de Vries (1884); Warburg (1886); Nuernbergk (1961); Bender (1971); Dittrich <i>et al.</i> (1973); Winter <i>et al.</i> (1983); Rayder and Ting (1983b); Sternberg <i>et al.</i> (1984); Martin <i>et al.</i> (2009)                                                                                                                                                                                                               |
|                       | <i>Huernia</i>                                                      | Dittrich <i>et al.</i> (1973); Spalding <i>et al.</i> (1979)                                                                                                                                                                                                                                                                                                                                                                      |
|                       | <i>Orbea</i>                                                        | Nuernbergk (1961), as <i>Stapelia variegata</i> L. = <i>Orbea variegata</i> (L.) Haw.; Bender (1971), as <i>Stapelia semota</i> N.E.Br. = <i>Orbea semota</i> (N.E.Br.) L.C.Leach                                                                                                                                                                                                                                                 |
|                       | <i>Quaqua</i>                                                       | Mooney <i>et al.</i> (1977a), as <i>Caralluma mammillaris</i> (L.) N.E.Br. = <i>Quaqua mammillaris</i> (L.) Bruyns                                                                                                                                                                                                                                                                                                                |
|                       | <i>Stapelia</i>                                                     | de Saussure (1804); de Vries (1884); Milburn <i>et al.</i> (1968); Dittrich <i>et al.</i> (1973)                                                                                                                                                                                                                                                                                                                                  |
| LAMIALES              |                                                                     |                                                                                                                                                                                                                                                                                                                                                                                                                                   |
| <b>Plantaginaceae</b> | <i>Littorella</i>                                                   | Madsen (1987); Keeley (1996)                                                                                                                                                                                                                                                                                                                                                                                                      |
| <b>Gesneriaceae</b>   |                                                                     |                                                                                                                                                                                                                                                                                                                                                                                                                                   |
| Didymocarpoideae      | <i>Haberlea</i>                                                     | Markovska <i>et al.</i> (1989, 1997); Markovska (1999)                                                                                                                                                                                                                                                                                                                                                                            |
|                       | <i>Ramonda</i>                                                      | Markovska <i>et al.</i> (1989, 1997)                                                                                                                                                                                                                                                                                                                                                                                              |
| Gesnerioideae         | <i>Codonanthis</i>                                                  | Guralnick <i>et al.</i> (1986), as <i>Codonanthis crassifolia</i> (H.Focke) C.V.Morton = <i>Codonanthis crassifolia</i> (H.Focke) Chautems & Mat.Perret; Holtum and Winter (2005), as <i>Codonanthis uleana</i> Fritsch = <i>Codonanthisopsis uleana</i> (Fritsch) Chautems & Mat.Perret                                                                                                                                          |
| <b>Lamiaceae</b>      |                                                                     |                                                                                                                                                                                                                                                                                                                                                                                                                                   |
| Lamioideae            | <i>Marrubium</i>                                                    | Markovska and Dimitrov (2001)                                                                                                                                                                                                                                                                                                                                                                                                     |



|                   |                                           |                                                                                                                                                                                                                                                                                                                                                                                                                                                                                                                                                                                                                                                                                                                                                                                                                                                                                                                                                                                                                                                                                                          |
|-------------------|-------------------------------------------|----------------------------------------------------------------------------------------------------------------------------------------------------------------------------------------------------------------------------------------------------------------------------------------------------------------------------------------------------------------------------------------------------------------------------------------------------------------------------------------------------------------------------------------------------------------------------------------------------------------------------------------------------------------------------------------------------------------------------------------------------------------------------------------------------------------------------------------------------------------------------------------------------------------------------------------------------------------------------------------------------------------------------------------------------------------------------------------------------------|
| Nepetoideae       | <i>Coleus</i>                             | Kluge and Ting (1978), as <i>Plectranthus prostratus</i> Gürke = <b><i>Coleus prostratus</i></b> (Gürke) A.J.Paton; von Willert <i>et al.</i> (1992) and Herppich and Herppich (1996), as <i>Plectranthus marrubioides</i> Holchst. ex Benth. = <b><i>Coleus cylindraceus</i></b> (Holchst. ex Benth.) A.J.Paton; Ramana and Chaitanya (2015); Winter <i>et al.</i> (2021c)                                                                                                                                                                                                                                                                                                                                                                                                                                                                                                                                                                                                                                                                                                                              |
| ASTERALES         |                                           |                                                                                                                                                                                                                                                                                                                                                                                                                                                                                                                                                                                                                                                                                                                                                                                                                                                                                                                                                                                                                                                                                                          |
| <b>Asteraceae</b> |                                           |                                                                                                                                                                                                                                                                                                                                                                                                                                                                                                                                                                                                                                                                                                                                                                                                                                                                                                                                                                                                                                                                                                          |
| Asteroideae       | <i>Baculellum</i>                         | Thoday and Evans (1931) and Thoday and Jones (1939), as <i>Kleinia articulata</i> (L.f.) Haw. = <b><i>Baculellum articulatum</i></b> (L.f.) L.V.Ozerova & A.C.Timonin                                                                                                                                                                                                                                                                                                                                                                                                                                                                                                                                                                                                                                                                                                                                                                                                                                                                                                                                    |
|                   | <i>Caputia</i>                            | Schütte <i>et al.</i> (1967), as <i>Kleinia tomentosa</i> Haw. = <b><i>Caputia tomentosa</i></b> (Haw.) B.Nord. & Pelser; Sternberg <i>et al.</i> (1984), Ruess and Eller (1985), and Griffiths (1988), as <i>Senecio medley-woodii</i> Hutch. = <b><i>Caputia medley-woodii</i></b> (Hutch.) B.Nord. & Pelser                                                                                                                                                                                                                                                                                                                                                                                                                                                                                                                                                                                                                                                                                                                                                                                           |
|                   | <i>Crassothonna</i>                       | von Willert <i>et al.</i> (1992), as <i>Othonna opima</i> Merxm. = <b><i>Crassothonna opima</i></b> (Merxm.) B.Nord.                                                                                                                                                                                                                                                                                                                                                                                                                                                                                                                                                                                                                                                                                                                                                                                                                                                                                                                                                                                     |
|                   | <i>Curio</i>                              | Warburg (1886), as <i>Senecio [crassifolia]</i> (DC.) Sch.Bip. = <b><i>Curio crassulifolius</i></b> (DC.) P.V.Heath; Thoday and Richards (1944), as <i>Kleinia radicans</i> (L.f.) Haw. = <b><i>Curio radicans</i></b> (L.f.) P.V.Heath; Thomas and Ranson (1954) and Dittrich <i>et al.</i> (1973), as <i>Kleinia repens</i> (L.) Haw. = <b><i>Curio repens</i></b> (L.) P.V.Heath; Nuernbergk (1961), as <i>Senecio [herreana]</i> Dinter = <b><i>Curio radicans</i></b> (Dinter) P.V.Heath; Mooney <i>et al.</i> (1977a), Sternberg <i>et al.</i> (1984), and Fioretto and Alfani (1988), as <i>Senecio radicans</i> (L.f.) Sch.Bip. = <b><i>Curio radicans</i></b> (L.f.) P.V.Heath; Earnshaw <i>et al.</i> (1987), as <i>Senecio mandraliscae</i> (Tineo) H.Jacobsen = <b><i>Curio talinoides</i></b> var. <b><i>mandraliscae</i></b> (Tineo) P.V.Heath; von Willert <i>et al.</i> (1992), as <i>Senecio corymbifer</i> DC. = <b><i>Curio corymbifer</i></b> (DC.) Eggli; Egbert and Martin (1999), as <i>Senecio rowleyanus</i> H.Jacobsen = <b><i>Curio rowleyanus</i></b> (H.Jacobsen) P.V.Heath |
|                   | <i>Kleinia</i> , including <i>Notonia</i> | Schütte <i>et al.</i> (1967), as <i>Senecio cephalophorus</i> (Compton) H.Jacobsen = <b><i>Kleinia cephalophora</i></b> Compton; Milburn <i>et al.</i> (1968) and Dittrich (1976), as <i>Notonia petraea</i> R.E.Fr. = <b><i>Kleinia petraea</i></b> (R.E.Fr.) C.Jeffrey; Bender (1971), as <i>Senecio gregorii</i> (S.Moore) H.Jacobsen = <b><i>Kleinia gregorii</i></b> (S.Moore) C.Jeffrey; Szarek and Ting (1977) and Fioretto and Alfani (1988), as <i>Senecio stapeliiformis</i> E.Phillips = <b><i>Kleinia stapeliiformis</i></b> Stapf; Chellappan <i>et al.</i> (1980), as <i>Notonia grandiflora</i> DC. = <b><i>Kleinia grandiflora</i></b> (Wall. ex DC.) N.Rani; von Willert <i>et al.</i> (1983, 1992) and Rundel <i>et al.</i> (1999), as <i>Senecio longiflorus</i> (DC.) Sch.Bip. = <b><i>Kleinia longiflora</i></b> DC.                                                                                                                                                                                                                                                                |
|                   | <i>Othonna</i>                            | Schütte <i>et al.</i> (1967); von Willert <i>et al.</i> (1992)                                                                                                                                                                                                                                                                                                                                                                                                                                                                                                                                                                                                                                                                                                                                                                                                                                                                                                                                                                                                                                           |
|                   | <i>Senecio</i>                            | Dittrich (1976); Fioretto and Alfani (1988)                                                                                                                                                                                                                                                                                                                                                                                                                                                                                                                                                                                                                                                                                                                                                                                                                                                                                                                                                                                                                                                              |

<sup>1</sup>For genera in which many CAM species have been segregated (e.g., *Microcoelia*), only those synonyms are listed for which CAM activity had been reported in the original publications.

<sup>2</sup>*Lecanopteris*: based on observations of statistically significant day–night changes in leaf titratable acidity.

<sup>3</sup>The monotypic *Anetium citrifolium* (L.) Splitg. has been proposed to be included in *Polytaenium* as *P. citrifolium* (L.) Schuettp.

<sup>4</sup>Smith and Epstein (1971) reported a  $\delta^{13}\text{C}$  value for *Welwitschia mirabilis* of  $-14.4\text{‰}$ , which is anomalously high. Values for plants sampled from field sites in Namibia have ranged between  $-17.39$  and  $-23.31\text{‰}$  (Schulze *et al.*, 1976; von Willert *et al.*, 1982, 2005), whereas cultivated material has been recorded with a value as low as  $-25.8\text{‰}$  (Ting and Burk, 1983).

<sup>5</sup>Based on unpublished  $\delta^{13}\text{C}$  values in Orchidaceae derived from herbarium material of *Caluera*, *Capanemia*, *Domingoa*, *Hintonella*, *Macradenia*, *Platyrhiza*, *Quekettia*, *Tolunnia*, *Warmingia*, and *Zygostates*.

<sup>6</sup>The most recent holistic phylogenetic treatments of Asphodelaceae are not well resolved (Treutlein *et al.*, 2003), but all phylogenies show Asphodeloideae as polyphyletic (e.g., Treutlein *et al.*, 2003; Manning *et al.*, 2014), with *Bulbine* generally sister to Aloioideae, as summarized by Smith and Figueiredo (2020).

<sup>7</sup>*Bulbine*: based on observations of statistically significant day–night changes in leaf titratable acidity.

<sup>8</sup>*Sansevieria* has been proposed to be subsumed within *Dracaena* (Lu and Morden, 2014; Mabberley, 2017; Takawira-Nyanya *et al.*, 2018).

<sup>9</sup>*Ochagavia*: based on observations of statistically significant day–night changes in leaf titratable acidity.

<sup>10</sup>The segregation of *Ursulaea* from *Aechmea* (which is highly polyphyletic) is accepted here following the taxonomy of Bratzel *et al.* (2023) and Gouda and Butcher (2023).

<sup>11</sup>The genera *Bakerantha* and *Mesoamerantha* have been proposed to be segregated from *Hechtia* as early-diverging lineages within Hechtioideae (Ramírez-Morillo *et al.*, 2018a,b); both would contain at least one CAM taxon (cf. Crayn *et al.*, 2015).

<sup>12</sup>*Josemania* has been considered a synonym of *Cipuropsis* (POWO, 2023), but we follow Barfuss *et al.* (2016) and Gouda and Butcher (2023) in recognizing *Josemania* as a distinct genus.

<sup>13</sup>All Crassulaceae are assumed CAM; the genera presented here are those with published data confirming CAM.

<sup>14</sup>*Prepodesma* is accepted, as the large dawn–dusk difference in titratable acidity reported for this taxon by Winter (2019) was reanalysed and shown to be statistically significant at  $P < 0.10$ .

<sup>15</sup>*Sarcozona*: based on observations of statistically significant day–night changes in leaf titratable acidity.

<sup>16</sup>*Calandrinia* is non-monophyletic (Hancock *et al.*, 2019) and CAM has only been observed in the monophyletic clade that includes all Australian members of *Calandrinia sensu lato*.

<sup>17</sup> $\delta^{13}\text{C}$  values were measured using a Finnigan DELTAplusXL mass spectrometer (Waltham, MA, USA) from dried, finely ground leaves.  $\delta^{13}\text{C}$  values skewed towards CAM-like values:  $-18.635\text{‰}$  (accession EJE253),  $-17.932\text{‰}$  (accession EJE254), and  $-26.482\text{‰}$  (accession EJE255), suggesting that *H. ameghinoi* is a  $\text{C}_3$ +CAM species.

<sup>18</sup>All cacti are assumed CAM; the genera presented here are those with published data confirming CAM.

<sup>19</sup>We do not include *Leuenbergeria*, but recognize that *Pereskia* is non-monophyletic.

<sup>20</sup>*Ceropegia* has recently been shown to be polyphyletic, with *Brachystelma* and the stem-succulent stapeliads (including *Apteranthes*, *Caralluma*, *Caudanthera*, *Boucerosia*, *Duvalia*, *Hoodia*, *Huernia*, *Orbea*, *Quaqua*, and *Stapelia*) nested within it. These genera are still recognized by Kew (POWO, 2023) and other authorities (Endress *et al.*, 2018), but have been proposed to be subsumed within an expanded and recircumscribed *Ceropegia* (Bruyns *et al.*, 2017).

TABLE S2. Lineages reported or suspected to use CAM, but for which further corroborative evidence is required.

| Taxon                                                                                                                           | Malate or acid accumulation | Habit                      | Notes                                                                                                                                                                                                                                                                                            |
|---------------------------------------------------------------------------------------------------------------------------------|-----------------------------|----------------------------|--------------------------------------------------------------------------------------------------------------------------------------------------------------------------------------------------------------------------------------------------------------------------------------------------|
| <b>Aizoaceae</b>                                                                                                                |                             |                            |                                                                                                                                                                                                                                                                                                  |
| <i>Aizoanthemopsis hispanica</i> (L.) Klak (reported as <i>Aizoon hispanicum</i> L.)                                            | N/A                         | Succulent herb             | Reported $\delta^{13}\text{C} = -23.22\%$ (Ziegler <i>et al.</i> , 1981), but this on its own does not distinguish between $\text{C}_3$ and $\text{C}_3+\text{CAM}$ .                                                                                                                            |
| <i>Aizoanthemum galenioides</i> (Fenzl ex Sond.) Friedrich                                                                      | N/A                         | Succulent herb             | Listed in Smith and Winter (1996), but reported $\delta^{13}\text{C} = -22.0\%$ (Mooney <i>et al.</i> , 1977a) on its own does not distinguish between $\text{C}_3$ and $\text{C}_3+\text{CAM}$ .                                                                                                |
| <i>Aloinopsis malherbei</i> (L.Bolus) L.Bolus (reported as <i>Nananthus [malherbi]</i> L.Bolus) ( $\text{C}_3$ )                | N/A                         | Succulent herb             | Listed by Black and Williams (1976) and Szarek and Ting (1977), based on $\delta^{13}\text{C}$ ratio of $-30.5\%$ (Bender <i>et al.</i> , 1973), but described as ‘suspected to be CAM’. Incorrectly listed under ‘Crassulaceae’ in these publications.                                          |
| <i>Amoebophyllum</i>                                                                                                            | N/A                         | Succulent herb             | Listed in Smith and Winter (1996), but now synonymized under <i>Glottiphyllum</i> and <i>Mesembryanthemum</i> .                                                                                                                                                                                  |
| <i>Lapidaria</i>                                                                                                                | N/A                         | Succulent herb             | Listed in Smith and Winter (1996), but primary evidence not found.                                                                                                                                                                                                                               |
| <i>Leipoldtia</i>                                                                                                               | N/A                         | Succulent herb             | Listed in Smith and Winter (1996). Two species reported by Rundel <i>et al.</i> (1999) both had $\text{C}_3$ -type $^{13}\text{C}$ ratios (expressed in $\Delta$ notation): <i>L. schultzei</i> (Schltr. & Diels) Friedrich and <i>L. weigangiana</i> (Dinter) Dinter & Schwantes ex H.Jacobsen. |
| <i>Mestoklema</i>                                                                                                               | N/A                         | Succulent herb             | Listed in Smith and Winter (1996). Kluge <i>et al.</i> (1995) reported an isotope ratio of $-22.8$ (3?) $\%$ for ‘ <i>Mestoklema</i> sp.’, but this does not distinguish between $\text{C}_3$ and $\text{C}_3+\text{CAM}$ .                                                                      |
| <i>Platythya</i>                                                                                                                | N/A                         | Succulent herb             | Listed in Smith and Winter (1996), but now synonymized under <i>Mesembryanthemum</i> .                                                                                                                                                                                                           |
| <i>Rhombophyllum</i>                                                                                                            | N/A                         | Succulent herb             | Listed in Smith and Winter (1996), but primary evidence not found.                                                                                                                                                                                                                               |
| <i>Ruscianthemum</i>                                                                                                            | N/A                         | Succulent herb             | Listed in Smith and Winter (1996), but now synonymized under <i>Stoeberia</i> .                                                                                                                                                                                                                  |
| <b>Amaranthaceae sensu lato<br/>(including Chenopodiaceae)</b>                                                                  |                             |                            |                                                                                                                                                                                                                                                                                                  |
| <i>Arthrocaulon macrostachyum</i> (Moric.) Piirainen & G.Kadereit (reported as <i>Salicornia virginica</i> L.) ( $\text{C}_3$ ) | N/A                         | Succulent halophytic shrub | Mentioned in listing of Black and Williams (1976), based on succulence and dark fixation of $^{14}\text{CO}_2$ (Webb and Burley, 1965).                                                                                                                                                          |
| <i>Halothamnus subaphyllus</i> (C.A.Mey.) Botsch. (reported as <i>Aellenia subaphylla</i> (C.A.Mey.) Aellen) ( $\text{C}_4$ )   | Small                       | Succulent halophytic shrub | Low rate of dark $^{14}\text{CO}_2$ fixation and incorporation into malate (Zalenskii and Glagoleva, 1981).                                                                                                                                                                                      |

|                                                                                                                                                 |                       |                                               |                                                                                                                                                                                                                                                                                |
|-------------------------------------------------------------------------------------------------------------------------------------------------|-----------------------|-----------------------------------------------|--------------------------------------------------------------------------------------------------------------------------------------------------------------------------------------------------------------------------------------------------------------------------------|
| <i>Haloxylon ammodendron</i><br>(C.A.Mey.) Bunge ex Fenzl<br>(reported as <i>Haloxylon</i><br><i>aphyllum</i> (Minkw.) Iljin) (C <sub>4</sub> ) | Small                 | Succulent halophytic<br>shrub                 | Low rate of dark <sup>14</sup> CO <sub>2</sub> fixation and incorporation<br>into malate and finally into sugars in the light<br>(Zalenskiĭ and Glagoleva, 1981).                                                                                                              |
| <i>Haloxylon persicum</i> Bunge (C <sub>4</sub> )                                                                                               | Small                 | Succulent halophytic<br>shrub                 | δ <sup>13</sup> C = -11.8‰ (Zalenskiĭ and Glagoleva, 1981).                                                                                                                                                                                                                    |
| <i>Horaninovia ulicina</i> Fisch. &<br>C.A.Mey. (C <sub>3</sub> )                                                                               | Small                 | Succulent halophytic<br>shrub                 | Low rate of dark <sup>14</sup> CO <sub>2</sub> fixation and incorporation<br>into malate (Zalenskiĭ and Glagoleva, 1981).                                                                                                                                                      |
| <i>Salsola kali</i> L. (C <sub>4</sub> )                                                                                                        | N/A                   | Succulent halophytic<br>shrub                 | Mentioned in listing of Black and Williams (1976),<br>based on succulence (Delf, 1912).                                                                                                                                                                                        |
| <i>Salsola praecox</i> (Litv.) Litv. (C <sub>4</sub> )                                                                                          | Small                 | Succulent halophytic<br>shrub                 | Low rate of dark <sup>14</sup> CO <sub>2</sub> fixation and incorporation<br>into malate (Zalenskiĭ and Glagoleva, 1981).                                                                                                                                                      |
| <i>Salicornia europaea</i> L. (reported<br>as <i>S. annua</i> Sm. and <i>S.</i><br><i>herbacea</i> L.) (C <sub>3</sub> )                        | N/A                   | Succulent halophytic<br>shrub                 | Mentioned in listing of Black and Williams (1976),<br>based on succulence (Delf, 1912; James, 1958)<br>and dark fixation of <sup>14</sup> CO <sub>2</sub> (Webb and Burley,<br>1965).                                                                                          |
| <i>Salicornia meyeriana</i> Moss (C <sub>3</sub> )                                                                                              | Small                 | Succulent halophytic<br>shrub                 | Up to 30% increase in nocturnal acidity (Schütte<br><i>et al.</i> , 1967).                                                                                                                                                                                                     |
| <i>Suaeda maritima</i> (L.) Dumort.<br>(C <sub>3</sub> )                                                                                        | N/A                   | Succulent halophytic<br>shrub                 | Mentioned in listing of Black and Williams (1976),<br>based on succulence (Delf, 1912).                                                                                                                                                                                        |
| <i>Xylosalsola richteri</i> (Moq.)<br>Akhani & Roalson (reported<br>as <i>Salsola richteri</i> (Moq.)<br>Karel ex Litv.) (C <sub>4</sub> )      | Small                 | Succulent halophytic<br>shrub                 | Low rate of dark <sup>14</sup> CO <sub>2</sub> fixation and incorporation<br>into malate; δ <sup>13</sup> C = -13.8‰ (Zalenskiĭ and<br>Glagoleva, 1981).                                                                                                                       |
| <b>Amaryllidaceae</b>                                                                                                                           |                       |                                               |                                                                                                                                                                                                                                                                                |
| <i>Clivia nobilis</i> Lindl. (C <sub>3</sub> )                                                                                                  | Small                 | Herbaceous,<br>evergreen perennial            | Small degree of daytime decrease in acidity reported<br>by Warburg (1886), but no subsequent<br>confirmation; family listed containing at least one<br>CAM species by Reinert and Blankenship (2010).                                                                          |
| <i>Haemanthus</i> (C <sub>3</sub> )                                                                                                             | Small                 | Herbaceous,<br>evergreen bulbous<br>perennial | Small degree of daytime decrease in acidity reported<br>in <i>Haemanthus [albus]</i> by Warburg (1886), but no<br>subsequent confirmation. POWO (2023) does not<br>list <i>H. albus</i> as a recognized taxon; it is likely<br>Warburg (1886) studied <i>H. albiflos</i> Jacq. |
| <i>Pancratium</i> sp. (C <sub>3</sub> )                                                                                                         | Small                 | Herbaceous, bulbous<br>perennial              | Small degree of daytime decrease in acidity reported<br>by Warburg (1886), but no subsequent<br>confirmation.                                                                                                                                                                  |
| <b>Apiaceae</b>                                                                                                                                 |                       |                                               |                                                                                                                                                                                                                                                                                |
| <i>Lilaeopsis lacustris</i> A.W.Hill<br>(C <sub>3</sub> )                                                                                       | Small to<br>moderate  | Aquatic/submerged                             | No malate or acid accumulation has been observed in<br>other <i>Lilaeopsis</i> species (Webb <i>et al.</i> , 1988;<br>Keeley, 1998).                                                                                                                                           |
| <b>Apocynaceae</b>                                                                                                                              |                       |                                               |                                                                                                                                                                                                                                                                                |
| <i>Adenium</i>                                                                                                                                  | N/A                   | Stem-succulent shrub                          | Has been mentioned in the context of stem<br>succulence, but no confirmed reports of CAM.<br>The basionym of <i>Pachypodium namaquanum</i><br>(Wyley ex Harv.) Welw. is <i>Adenium</i><br><i>namaquanum</i> Wyley ex Harv. (Rao <i>et al.</i> , 1979).                         |
| <i>Carissa spinarum</i> L. (C <sub>3</sub> )                                                                                                    | Moderate to<br>strong | Thin-leaved shrub to<br>small tree            | Nocturnal stomatal conductance, accumulation of<br>malate, and PEPC activity, but C <sub>3</sub> -like δ <sup>13</sup> C ratios<br>observed in the field (Rao <i>et al.</i> , 1979).                                                                                           |

**Arecaceae**

*Phoenix dactylifera* L. (C<sub>3</sub>)      N/A      Evergreen palm      Small degree of daytime decrease in acidity reported by Warburg (1886), but no subsequent confirmation.

**Aristolochiaceae**

*Aristolochia bracteolata* Lam.      N/A      Prostrate perennial      Apparently large day-night changes in titratable acidity (Deshmukh and Murumkar, 1996); not yet confirmed in independent studies.  
(reported as *A. bracteata* ['Ritz.'] Retz.) (C<sub>3</sub>)

**Asteraceae**

*Borrhchia frutescens* (L.) DC.      N/A      Halophytic herb      Mentioned in listing of Black and Williams (1976), based on succulence and dark fixation of <sup>14</sup>CO<sub>2</sub> (Webb and Burley, 1965).  
(C<sub>3</sub>)

*Delairea odorata* Lem. (reported as *Senecio scandens* DC. by Fioretto and Alani (1988) and as *Senecio mikanioides* Otto ex Walp. by Sternberg *et al.* (1984)) (C<sub>3</sub>+CAM)      Small      Climbing vine with slightly succulent stems      Fioretto and Alfani (1988) report both significant and non-significant day-night changes in titratable acidity and δ<sup>13</sup>C ratio > -28‰. Sternberg *et al.* (1984) label this species as CAM-cycling. *D. odorata* is a member of the *Curio* alliance, which contains multiple other C<sub>3</sub>+CAM lineages.

[*Hoplophytum grande* É.Morren ex Baker (CAM)]      Moderate      Epiphyte      Mentioned in listing of Black and Williams (1976), based on nighttime acidification recorded by Warburg (1886), but erroneously included under Asteraceae ('Compositae'). This taxon belongs to family Bromeliaceae and is now known under its basionym *Aechmea mexicana* Baker.

*Jacobaea aquatica* (Hill) G.Gaertn., B.Mey. & Scherb. (reported as *Senecio aquaticus* Hill) (C<sub>3</sub>)      Small      Mesic herb      Fioretto and Alfani (1988) observed small fluctuations in acidity and malic acid content, albeit with standard deviations of a similar magnitude; no net-positive dark-period CO<sub>2</sub> fixation was observed, and δ<sup>13</sup>C was approximated -27‰.

*Mikania micrantha* Kunth (C<sub>3</sub>)      Small      Sprawling vine      Claimed by Liu *et al.* (2020) to show CAM activity based on evidence from enzyme activity assays, some degree of nocturnal stomatal opening, and nocturnal malate accumulation. Reported day-night changes in malate in Liu *et al.* (2020) appear to be very small (approx. 0.26 mM).

*Tripolium pannonicum* (Jacq.) Dobroc. ssp. *tripolium* (L.) Greuter (reported as *Aster tripolium* L.) (C<sub>3</sub>)      Moderate      Succulent halophytic herb      Nocturnal malate accumulation and reduced rate of respiratory CO<sub>2</sub> release towards end of night (Ganzmann and von Willert, 1972).

**Basellaceae**

*Ullucus tuberosus* Caldas (C<sub>3</sub>)      NA      Fleshy-leaved perennial with large tubers      Member of Portulacineae but only C<sub>3</sub>-like δ<sup>13</sup>C ratios have been reported (-25.8‰) (Szpak *et al.*, 2013).

**Bataceae**

*Batis maritima* L. (C<sub>3</sub>)      N/A      Succulent halophytic herb      Mentioned in listing of Black and Williams (1976), based on succulence (Delf, 1912) and dark fixation of <sup>14</sup>CO<sub>2</sub> (Webb and Burley, 1965). δ<sup>13</sup>C = -26.4‰ (Lüttge *et al.*, 1989b).

**Brassicaceae**

*Thlaspi arvense* L. (C<sub>3</sub>) Small Annual herb, predominantly temperate Day-night changes in titratable acidity (Murumkar *et al.*, 1991); not yet confirmed in independent studies.

**Bromeliaceae**

*Catopsis nutans* (Sw.) Griseb. (C<sub>3</sub>) Small Tank-forming epiphyte Medina (1974) observed small dark-period malate accumulation, but no net dark-period CO<sub>2</sub> fixation.

*Guzmania lingulata* (L.) Mez N/A Epiphyte Dittrich *et al.* (1973) measured relatively high activities of PEP carboxylase and PEP carboxykinase in this taxon, which is a shade-tolerant epiphyte with C<sub>3</sub>-type  $\delta^{13}\text{C}$  values that has shown no evidence of dark CO<sub>2</sub> fixation or significant day–night changes in titratable acidity (Medina, 1974; Griffiths and Smith, 1983; Smith *et al.*, 1985; Beltrán *et al.*, 2013).

*Vriesea platynema* Gaudich. (C<sub>3</sub>) Small Tank-forming epiphyte Medina (1974) observed small dark-period malate accumulation, but no net dark-period CO<sub>2</sub> fixation.

**Campanulaceae**

*Downingia bella* Hoover (C<sub>3</sub>) Small Submerged aquatic macrophyte Small fluctuation in malate but no fluctuations in titratable acidity; PEPC and PPDK activities similar to other aquatic CAM lineages (Keeley, 1998).

**Capparaceae**

*Cadaba aphylla* (Thunb.) Wild (CAM or C<sub>4</sub>?) N/A Leafless spinose shrub Schulze *et al.* (1976) reported a  $\delta^{13}\text{C}$  ratio of –16.93‰ for material sampled from its natural habitat; Winter (2019) suggested this taxon warrants investigation for CAM (or C<sub>4</sub>) activity.

*Capparis decidua* (Forssk.) Edgew. (C<sub>3</sub>) N/A Leafless spinose shrub Small day–night change in titratable acidity in stem tissue (Patil and Murumkar, 2017); not yet confirmed in independent studies.

**Caryophyllaceae**

*Honckenya peploides* (L.) Ehrh. (reported as *Arenaria peploides* L.) (C<sub>3</sub>) N/A Succulent halophytic herb Mentioned in listing of Black and Williams (1976), based on succulence (Delf, 1912).

**Celastraceae**

*Gymnosporia emarginata* [Laws.?] (Willd.) Thwaites (C<sub>3</sub>) Moderate to strong Thin-leaved shrub Nocturnal stomatal conductance, accumulation of malate, and PEPC activity, but C<sub>3</sub>-like  $\delta^{13}\text{C}$  ratios observed in the field (Rao *et al.*, 1979).

**Commelinaceae**

*Murdannia nudiflora* (L.) Brenan (reported as *Commelina nudiflora* L.) (C<sub>3</sub>) Moderate Prostrate perennial herb Substantial day-night changes in titratable acidity (Deshmukh and Murumkar, 2013); not yet confirmed in independent studies.

**Crassulaceae**

*Parvisedum* (C<sub>3</sub>+CAM) N/A Succulent herb Listed in Smith and Winter (1986), but no positive evidence of CAM activity (cf. Teeri *et al.*, 1981). Now synonymized under *Sedum*.

**Cyperaceae**

|                                                                                                                               |       |                   |                                                                                                                               |
|-------------------------------------------------------------------------------------------------------------------------------|-------|-------------------|-------------------------------------------------------------------------------------------------------------------------------|
| <i>Isolepis setacea</i> (L.) R.Br.<br>(reported as <i>Scirpus setaceus</i><br>Thunb.) (C <sub>3</sub> )                       | Small | Aquatic/submerged | Keeley and Morton (1982)                                                                                                      |
| <i>Schoenoplectus subterminalis</i><br>(Torr.) Soják (reported as<br><i>Scirpus subterminalis</i> Torr.)<br>(C <sub>3</sub> ) | Small | Aquatic/submerged | Beer and Wetzel (1981) found slight acid<br>fluctuations, nocturnal malate accumulation, and<br>elevated PEPC:Rubisco ratios. |

**Didiereaceae**

|                                        |    |                                       |                                                                                                                                                                                                                                                                        |
|----------------------------------------|----|---------------------------------------|------------------------------------------------------------------------------------------------------------------------------------------------------------------------------------------------------------------------------------------------------------------------|
| <i>Calyptrorhiza</i> (C <sub>3</sub> ) | NA | Succulent-leaved<br>caudiciform shrub | To our knowledge, the only known $\delta^{13}\text{C}$ ratios are<br>−24.86‰ ( <i>C. somalensis</i> Gilg) and −23.34‰ ( <i>C.</i><br><i>taitensis</i> (Pax & Vatke) Brenan), consistent with<br>C <sub>3</sub> +CAM but not conclusive (Sikolia <i>et al.</i> , 2008). |
|----------------------------------------|----|---------------------------------------|------------------------------------------------------------------------------------------------------------------------------------------------------------------------------------------------------------------------------------------------------------------------|

**Ebenaceae**

|                                                                                                                       |                       |                  |                                                                                                                                                                                        |
|-----------------------------------------------------------------------------------------------------------------------|-----------------------|------------------|----------------------------------------------------------------------------------------------------------------------------------------------------------------------------------------|
| <i>Diospyros ferrea</i> (Lour.)<br>A.Chev. (reported as <i>Maba</i><br><i>buxifolia</i> [Cl.?] Ch.) (C <sub>3</sub> ) | Moderate to<br>strong | Thin-leaved tree | Nocturnal stomatal conductance, accumulation of<br>malate, and PEPC activity but C <sub>3</sub> -like $\delta^{13}\text{C}$ ratios<br>observed in the field (Rao <i>et al.</i> , 1979) |
|-----------------------------------------------------------------------------------------------------------------------|-----------------------|------------------|----------------------------------------------------------------------------------------------------------------------------------------------------------------------------------------|

**Elatinaceae**

|                                                     |       |                   |                                                                                                                                       |
|-----------------------------------------------------|-------|-------------------|---------------------------------------------------------------------------------------------------------------------------------------|
| <i>Elatine californica</i> A.Gray (C <sub>3</sub> ) | Small | Aquatic/submerged | Small fluctuation in malate but no fluctuations in<br>titratable acidity; low PEPC activity and no<br>detectable PPDk (Keeley, 1998). |
|-----------------------------------------------------|-------|-------------------|---------------------------------------------------------------------------------------------------------------------------------------|

**Fabaceae**

|                                                       |                      |                  |                                                                                                                                                                                                                                                                     |
|-------------------------------------------------------|----------------------|------------------|---------------------------------------------------------------------------------------------------------------------------------------------------------------------------------------------------------------------------------------------------------------------|
| <i>Prosopis juliflora</i> (Sw.) DC. (C <sub>3</sub> ) | Small to<br>moderate | Thin-leaved tree | Szarek and Ting (1977) and Sayed (2001) in their<br>compilations cite Gaur (1968), who measured<br>titratable acidity changes, but claim in text of<br>acidity increases at night conflicts with data<br>presented in Figure, which appear to show the<br>opposite. |
|-------------------------------------------------------|----------------------|------------------|---------------------------------------------------------------------------------------------------------------------------------------------------------------------------------------------------------------------------------------------------------------------|

**Geraniaceae**

|                                               |         |                                          |                                                                                                                                                                                                                                                                                                                                                                                                            |
|-----------------------------------------------|---------|------------------------------------------|------------------------------------------------------------------------------------------------------------------------------------------------------------------------------------------------------------------------------------------------------------------------------------------------------------------------------------------------------------------------------------------------------------|
| <i>Geranium pratense</i> L. (C <sub>3</sub> ) | Unknown | Thin-leaved herb,<br>primarily temperate | 700% nocturnal increase in titratable acidity is noted<br>in Table VII of Bennet-Clark (1933), citing an<br>observation of Kraus (1883), but absolute<br>magnitude is unknown. This taxon was included<br>in the CAM listings of Szarek and Ting (1977)<br>and Kluge and Ting (1978), but Thomas and<br>Beever (1949) noted that they could detect no<br>day–night fluctuation in acidity in this species. |
|-----------------------------------------------|---------|------------------------------------------|------------------------------------------------------------------------------------------------------------------------------------------------------------------------------------------------------------------------------------------------------------------------------------------------------------------------------------------------------------------------------------------------------------|

**Haloragaceae**

|                                                         |       |                   |                                                                                         |
|---------------------------------------------------------|-------|-------------------|-----------------------------------------------------------------------------------------|
| <i>Myriophyllum quitense</i> Kunth<br>(C <sub>3</sub> ) | Small | Aquatic/submerged | Small fluctuation in malate but no fluctuations in<br>titratable acidity (Keeley 1998). |
|---------------------------------------------------------|-------|-------------------|-----------------------------------------------------------------------------------------|

**Hydrangeaceae**

|                                                                                                                                                           |     |                 |                                                                                                                                                                                                                                                                                       |
|-----------------------------------------------------------------------------------------------------------------------------------------------------------|-----|-----------------|---------------------------------------------------------------------------------------------------------------------------------------------------------------------------------------------------------------------------------------------------------------------------------------|
| <i>Philadelphus microphyllus</i><br>A.Gray (reported as <i>P.</i><br><i>microphyllus</i> C.L.Hitchc.,<br>'Saxifragaceae', by Smith and<br>Epstein (1971)) | N/A | Deciduous shrub | Smith and Epstein (1971) reported a $\delta^{13}\text{C}$ ratio of<br>−17.1‰ for <i>Philadelphus microphyllus</i><br>(Hydrangeaceae, non Saxifragaceae), but<br>Troughton <i>et al.</i> (1974b) reported C <sub>3</sub> -like values<br>for three other taxa in <i>Philadelphus</i> . |
|-----------------------------------------------------------------------------------------------------------------------------------------------------------|-----|-----------------|---------------------------------------------------------------------------------------------------------------------------------------------------------------------------------------------------------------------------------------------------------------------------------------|

**Hydrocharitaceae**

|                                                                |       |                   |                                                                                                                                                                                                                                       |
|----------------------------------------------------------------|-------|-------------------|---------------------------------------------------------------------------------------------------------------------------------------------------------------------------------------------------------------------------------------|
| <i>Hydrilla verticillata</i> (L.f.) Royle<br>(C <sub>4</sub> ) | Small | Aquatic/submerged | Cited in Cockburn (1985). Dark CO <sub>2</sub> fixation up to<br>30% that of light fixation rates (Holaday and<br>Bowes, 1990); close relative to CAM <i>Vallisneria</i> .<br><i>Hydrilla</i> appears to perform facultative, single- |
|----------------------------------------------------------------|-------|-------------------|---------------------------------------------------------------------------------------------------------------------------------------------------------------------------------------------------------------------------------------|

|                                                                                                                                                                                                       |       |                                                                             |  |                                                                                                                                                                                                                                                                                                                                                                                                                                                                                                                                                                                                                                    |
|-------------------------------------------------------------------------------------------------------------------------------------------------------------------------------------------------------|-------|-----------------------------------------------------------------------------|--|------------------------------------------------------------------------------------------------------------------------------------------------------------------------------------------------------------------------------------------------------------------------------------------------------------------------------------------------------------------------------------------------------------------------------------------------------------------------------------------------------------------------------------------------------------------------------------------------------------------------------------|
|                                                                                                                                                                                                       |       |                                                                             |  | cell C <sub>4</sub> photosynthesis (von Caemmerer <i>et al.</i> , 2014).                                                                                                                                                                                                                                                                                                                                                                                                                                                                                                                                                           |
| <b>Juncaceae</b>                                                                                                                                                                                      |       |                                                                             |  |                                                                                                                                                                                                                                                                                                                                                                                                                                                                                                                                                                                                                                    |
| <i>Eleocharis maculosa</i> (Vahl) Roem. & Schult. (C <sub>3</sub> )                                                                                                                                   | Small | Aquatic/submerged                                                           |  | *Small fluctuation in malate but no fluctuations in titratable acidity. Pulse–chase experiments show that malate is initially formed in the dark, but little malate remains by the end of the dark period (Keeley, 1998).                                                                                                                                                                                                                                                                                                                                                                                                          |
| <b>Lamiaceae</b>                                                                                                                                                                                      |       |                                                                             |  |                                                                                                                                                                                                                                                                                                                                                                                                                                                                                                                                                                                                                                    |
| <i>Plectranthus parviflorus</i> ‘Henckel’ (C <sub>3</sub> )                                                                                                                                           | N/A   | Perennial herb                                                              |  | Listed by Sayed (2001) as a CAM plant, citing Nobel <i>et al.</i> (1975), although that study solely concerned the effects of light intensity on leaf anatomy.                                                                                                                                                                                                                                                                                                                                                                                                                                                                     |
| <b>Orchidaceae</b>                                                                                                                                                                                    |       |                                                                             |  |                                                                                                                                                                                                                                                                                                                                                                                                                                                                                                                                                                                                                                    |
| <i>Aerides</i> Lour. (C <sub>3</sub> )                                                                                                                                                                | N/A   | Epiphytic herb                                                              |  | Hypothesized to use CAM based on mesophyll succulence (Avadhani <i>et al.</i> , 1982).                                                                                                                                                                                                                                                                                                                                                                                                                                                                                                                                             |
| <i>Calanthe</i> R.Br.                                                                                                                                                                                 | N/A   | Epiphytic herb                                                              |  | Hypothesized to use CAM based on mesophyll succulence (Avadhani <i>et al.</i> , 1982).                                                                                                                                                                                                                                                                                                                                                                                                                                                                                                                                             |
| <b>Orobanchaceae</b>                                                                                                                                                                                  |       |                                                                             |  |                                                                                                                                                                                                                                                                                                                                                                                                                                                                                                                                                                                                                                    |
| <i>Lindenbergia muraria</i> (Roxb. ex D.Don) Brühl (reported as <i>L. urticifolia</i> Lehm.) (C <sub>3</sub> )                                                                                        | N/A   | Annual herb                                                                 |  | Gaur (1968) cited “Bharuca, F.R. and Dhabolkar, M.V. (1957) J. Univ. Bomb. 26, 3, 48”; but we cannot locate this publication.                                                                                                                                                                                                                                                                                                                                                                                                                                                                                                      |
| <b>Oxalidaceae</b>                                                                                                                                                                                    |       |                                                                             |  |                                                                                                                                                                                                                                                                                                                                                                                                                                                                                                                                                                                                                                    |
| <i>Oxalis</i> sp. (reported as <i>O. carnososa</i> , which could refer to <i>O. magellanica</i> G.Forst., <i>O. mollendoensis</i> J.M.H.Shaw, or <i>O. megalorrhiza</i> Jacq.) (C <sub>3</sub> +CAM?) | Small | Perennial with succulent rootstock and slightly succulent leaves and stems. |  | Kluge and Ting (1978) reported a diurnal acid change of 55 µeq g <sup>-1</sup> fresh weight; more recent studies of gas exchange and acid fluctuations in <i>O. megalorrhiza</i> Jacq. did not corroborate the presence of CAM in this taxon, and suggested that high (non-fluctuating) acid levels were largely due to the presence of oxalic acid (K. Winter, unpublished). Another ‘partially succulent’, drought-deciduous species of <i>Oxalis</i> from Chile, <i>O. virgosa</i> Molina (reported under the name <i>O. gigantea</i> Barnéoud) had a measured δ <sup>13</sup> C value of -25.2‰ (Mooney <i>et al.</i> , 1974). |
| <b>Plantaginaceae</b>                                                                                                                                                                                 |       |                                                                             |  |                                                                                                                                                                                                                                                                                                                                                                                                                                                                                                                                                                                                                                    |
| <i>Plantago maritima</i> L. (C <sub>3</sub> )                                                                                                                                                         | N/A   | Halophytic herb                                                             |  | Mentioned in listing of Black and Williams (1976), based on succulence (Delf, 1912).                                                                                                                                                                                                                                                                                                                                                                                                                                                                                                                                               |
| <b>Poaceae</b>                                                                                                                                                                                        |       |                                                                             |  |                                                                                                                                                                                                                                                                                                                                                                                                                                                                                                                                                                                                                                    |
| <i>Orcuttia californica</i> Vasey (C <sub>4</sub> )                                                                                                                                                   | Small | Aquatic/submerged                                                           |  | Small fluctuation in malate but none in titratable acidity. Pulse–chase experiments show that malate is initially formed in the dark, but little malate remains by the end of the dark period. Malate also accumulates in the light (Keeley, 1998).                                                                                                                                                                                                                                                                                                                                                                                |
| <i>Spinifex littoreus</i> (Burm.f.) Merr. (C <sub>4</sub> +CAM)                                                                                                                                       | Small | Perennial semi-succulent grass                                              |  | Significant nocturnal increases in titratable acidity in some field populations (Ho <i>et al.</i> , 2019); further confirmation needed.                                                                                                                                                                                                                                                                                                                                                                                                                                                                                            |



|                                                                                                                                                                 |                    |                                 |                                                                                                                                                                                                                                                                                                                                                                                                                                                                                                                         |
|-----------------------------------------------------------------------------------------------------------------------------------------------------------------|--------------------|---------------------------------|-------------------------------------------------------------------------------------------------------------------------------------------------------------------------------------------------------------------------------------------------------------------------------------------------------------------------------------------------------------------------------------------------------------------------------------------------------------------------------------------------------------------------|
| <b>Rapateaceae</b> (C <sub>3</sub> )                                                                                                                            | N/A                | Perennial rhizomatous herbs     | Listed in Reinert and Blankenship (2010), but no evidence for CAM presented. Crayn <i>et al.</i> (2001) measured $\delta^{13}\text{C}$ ratios for 85 taxa, which were all C <sub>3</sub> -like, but pointed out that the possibility of low-level CAM activity could not be excluded on the basis of isotope values alone.                                                                                                                                                                                              |
| <b>Salicaceae</b>                                                                                                                                               |                    |                                 |                                                                                                                                                                                                                                                                                                                                                                                                                                                                                                                         |
| <i>Flacourtia indica</i> (Burm.f.) Merr. (reported as <i>Flacourtia sepiaria</i> Roxb.) (C <sub>3</sub> )                                                       | Moderate to strong | Thin-leaved shrub to small tree | Nocturnal stomatal conductance, accumulation of malate, and PEPC activity but C <sub>3</sub> -like $\delta^{13}\text{C}$ values observed in the field (Rao <i>et al.</i> , 1979).                                                                                                                                                                                                                                                                                                                                       |
| <b>Salvadoraceae</b>                                                                                                                                            |                    |                                 |                                                                                                                                                                                                                                                                                                                                                                                                                                                                                                                         |
| <i>Salvadora persica</i> L. (C <sub>3</sub> )                                                                                                                   | Small to moderate  | Tree with thickened leaves      | Twigs and thickened leaves have many active compounds with medicinal value. Szarek and Ting (1977) and Sayed (2001) in their compilations cite Gaur (1968), who measured titratable acidity changes, but claim in text of acidity increases at night conflicts with data presented in Figure, which appear to show the opposite. C <sub>3</sub> -like $\delta^{13}\text{C}$ ratios observed in the field (Winter <i>et al.</i> , 1976).                                                                                 |
| <b>Santalaceae</b>                                                                                                                                              |                    |                                 |                                                                                                                                                                                                                                                                                                                                                                                                                                                                                                                         |
| <i>Thesium confusum</i> J.C.Manning & F.Forest (reported as <i>Thesidium fragile</i> Sond.) (C <sub>3</sub> )                                                   | Small              | Succulent hemiparasite          | Up to 30% increase in nocturnal acidity (Schütte <i>et al.</i> , 1967).                                                                                                                                                                                                                                                                                                                                                                                                                                                 |
| <i>Viscum</i> sp. (C <sub>3</sub> )                                                                                                                             | Moderate           | Succulent hemiparasite          | Unknown succulent <i>Viscum</i> species from South Africa found to have up to 60% increase in nocturnal acidity (Schütte <i>et al.</i> , 1967).                                                                                                                                                                                                                                                                                                                                                                         |
| <b>Sapindaceae</b>                                                                                                                                              |                    |                                 |                                                                                                                                                                                                                                                                                                                                                                                                                                                                                                                         |
| <i>Dodonaea viscosa</i> (L.) Jacq. (C <sub>3</sub> )                                                                                                            | Moderate to strong | Thin-leaved shrub               | Nocturnal stomatal conductance, accumulation of malate, and PEPC activity, but C <sub>3</sub> -like $\delta^{13}\text{C}$ values observed in the field (Rao <i>et al.</i> , 1979).                                                                                                                                                                                                                                                                                                                                      |
| <b>Solanaceae</b>                                                                                                                                               |                    |                                 |                                                                                                                                                                                                                                                                                                                                                                                                                                                                                                                         |
| <i>Nolana rostrata</i> (Lindl.) Miers ex Dunal (reported as <i>Alona rostrata</i> Lindl. under 'Convolvulaceae' in Black and Williams (1976)) (C <sub>3</sub> ) | N/A                | Perennial subshrub              | Mentioned in listing of Black and Williams (1976), based on $\delta^{13}\text{C}$ ratio of $-20.9\text{‰}$ (Troughton <i>et al.</i> , 1974b).                                                                                                                                                                                                                                                                                                                                                                           |
| <b>Tamaricaceae</b>                                                                                                                                             |                    |                                 |                                                                                                                                                                                                                                                                                                                                                                                                                                                                                                                         |
| <i>Tamarix ramosissima</i> Ledeb. (C <sub>3</sub> )                                                                                                             | N/A                | Deciduous shrub to small tree   | Claimed by Yan <i>et al.</i> (2022) to show CAM activity based on gene expression data that show a slight decrease in <i>PEPC</i> transcripts during the day. However, expression was low, not partitioned between paralogs, and further decreased under water stress. Other patterns of photosynthesis and CAM-related gene expression were not consistent; e.g., <i>RBCS</i> transcripts peaked at night, <i>PPDK</i> transcripts were time-invariant, and photosynthetic rates were below zero under all conditions. |

**Theaceae**

*Camellia oleifera* C.Abel (C<sub>3</sub>) Small to moderate Thin-leaved shrub Fungal-induced CAM physiology and succulent leaf morphology (Yuan *et al.*, 2012).

**Urticaceae**

*Forsskaolea candida* L.f. (C<sub>3</sub>) N/A Fleshy-leaved shrub  $\delta^{13}\text{C}$  ratio of  $-21.3\text{‰}$  (Rundel *et al.*, 1999) is in range of C<sub>3</sub>+CAM; CAM also present in *Pilea* (Urticaceae)

**Zygophyllaceae**

*Roepera cordifolia* (L.f.) Beier & Thulin (reported as *Zygophyllum cordifolium* L.f.) (C<sub>3</sub>) Small to moderate Succulent shrub Nocturnal increase in titratable acidity under some conditions (Matimati *et al.*, 2012); Rundel *et al.* (1999) reported a  $\delta^{13}\text{C}$  value of  $-24.9\text{‰}$

*Zygophyllum prismatocarpum* Sond. (C<sub>3</sub>) N/A Succulent shrub  $\delta^{13}\text{C}$  ratio in the range of C<sub>3</sub>+CAM:  $-22.3\text{‰}$  (Rundel *et al.*, 1999).

*Zygophyllum stapffii* Schinz (C<sub>3</sub>) N/A Succulent shrub Variable  $\delta^{13}\text{C}$  ratios in the range of C<sub>3</sub>+CAM:  $-21.86\text{‰}$ ,  $-22.21\text{‰}$ ,  $-25.69\text{‰}$  (Schulze *et al.*, 1976).

*Zygophyllum simplex* L. (C<sub>4</sub>) N/A Succulent shrub A C<sub>4</sub> plant with typical  $\delta^{13}\text{C}$  ratios (Schulze *et al.*, 1976; Mooney *et al.*, 1977a; Ziegler *et al.*, 1981), but occasionally mentioned in the context of CAM (Mooney *et al.*, 1977a; Lehmann *et al.*, 2013, 2015; Burke, 2017)

TABLE S3. Estimated CAM species diversity in each genus containing CAM species. See main text for binning methodology. To estimate lower bounds (LB) and upper bounds (UB), we moved every genus either down or up a bin, respectively; genera binned as “few” were recategorized as “rare” (1%) when estimating lower bounds and genera binned as “all” were not altered when estimating upper bounds. Taxonomy and species counts are according to World Checklist of Vascular Plants version 10 (Govaerts *et al.*, 2021), accessed through POWO (2023), which contained 349,036 accepted, non-hybrid species names. Taxa are ordered alphabetically by family and then by genus.

| Family    | Genus                  | Species | Bin  | Species with CAM (%) | Species with CAM [LB] (%) | Species with CAM [UB] (%) |
|-----------|------------------------|---------|------|----------------------|---------------------------|---------------------------|
| Aizoaceae | <i>Antimima</i>        | 106     | Most | 80 (0.75)            | 53 (0.5)                  | 106 (1.0)                 |
| Aizoaceae | <i>Argyroderma</i>     | 11      | All  | 11 (1.0)             | 9 (0.75)                  | 11 (1.0)                  |
| Aizoaceae | <i>Astridia</i>        | 13      | All  | 13 (1.0)             | 10 (0.75)                 | 13 (1.0)                  |
| Aizoaceae | <i>Bergeranthus</i>    | 7       | All  | 7 (1.0)              | 6 (0.75)                  | 7 (1.0)                   |
| Aizoaceae | <i>Carpobrotus</i>     | 13      | All  | 13 (1.0)             | 10 (0.75)                 | 13 (1.0)                  |
| Aizoaceae | <i>Carruanthus</i>     | 2       | All  | 2 (1.0)              | 2 (0.75)                  | 2 (1.0)                   |
| Aizoaceae | <i>Cephalophyllum</i>  | 34      | All  | 34 (1.0)             | 26 (0.75)                 | 34 (1.0)                  |
| Aizoaceae | <i>Chasmatophyllum</i> | 7       | All  | 7 (1.0)              | 6 (0.75)                  | 7 (1.0)                   |
| Aizoaceae | <i>Cheiridopsis</i>    | 41      | All  | 41 (1.0)             | 31 (0.75)                 | 41 (1.0)                  |
| Aizoaceae | <i>Conophytum</i>      | 106     | All  | 106 (1.0)            | 80 (0.75)                 | 106 (1.0)                 |

|                   |                         |     |      |            |           |           |
|-------------------|-------------------------|-----|------|------------|-----------|-----------|
| Aizoaceae         | <i>Delosperma</i>       | 170 | Most | 128 (0.75) | 85 (0.5)  | 170 (1.0) |
| Aizoaceae         | <i>Disphyma</i>         | 4   | All  | 4 (1.0)    | 3 (0.75)  | 4 (1.0)   |
| Aizoaceae         | <i>Dracophilus</i>      | 2   | All  | 2 (1.0)    | 2 (0.75)  | 2 (1.0)   |
| Aizoaceae         | <i>Drosanthemopsis</i>  | 4   | All  | 4 (1.0)    | 3 (0.75)  | 4 (1.0)   |
| Aizoaceae         | <i>Drosanthemum</i>     | 110 | All  | 110 (1.0)  | 83 (0.75) | 110 (1.0) |
| Aizoaceae         | <i>Eberlanzia</i>       | 8   | All  | 8 (1.0)    | 6 (0.75)  | 8 (1.0)   |
| Aizoaceae         | <i>Faucaria</i>         | 8   | All  | 8 (1.0)    | 6 (0.75)  | 8 (1.0)   |
| Aizoaceae         | <i>Fenestraria</i>      | 1   | All  | 1 (1.0)    | 1 (0.75)  | 1 (1.0)   |
| Aizoaceae         | <i>Glottiphyllum</i>    | 16  | All  | 16 (1.0)   | 12 (0.75) | 16 (1.0)  |
| Aizoaceae         | <i>Hereroa</i>          | 28  | All  | 28 (1.0)   | 21 (0.75) | 28 (1.0)  |
| Aizoaceae         | <i>Jacobsenia</i>       | 2   | All  | 2 (1.0)    | 2 (0.75)  | 2 (1.0)   |
| Aizoaceae         | <i>Jordaniella</i>      | 7   | All  | 7 (1.0)    | 6 (0.75)  | 7 (1.0)   |
| Aizoaceae         | <i>Lampranthus</i>      | 123 | All  | 123 (1.0)  | 93 (0.75) | 123 (1.0) |
| Aizoaceae         | <i>Lapidaria</i>        | 1   | All  | 1 (1.0)    | 1 (0.75)  | 1 (1.0)   |
| Aizoaceae         | <i>Leipoldtia</i>       | 13  | Most | 10 (0.75)  | 7 (0.5)   | 13 (1.0)  |
| Aizoaceae         | <i>Lithops</i>          | 38  | All  | 38 (1.0)   | 29 (0.75) | 38 (1.0)  |
| Aizoaceae         | <i>Malephora</i>        | 17  | All  | 17 (1.0)   | 13 (0.75) | 17 (1.0)  |
| Aizoaceae         | <i>Mesembryanthemum</i> | 106 | Most | 80 (0.75)  | 53 (0.5)  | 106 (1.0) |
| Aizoaceae         | <i>Mestoklema</i>       | 6   | All  | 6 (1.0)    | 5 (0.75)  | 6 (1.0)   |
| Aizoaceae         | <i>Meyerophytum</i>     | 2   | All  | 2 (1.0)    | 2 (0.75)  | 2 (1.0)   |
| Aizoaceae         | <i>Mitrophyllum</i>     | 7   | All  | 7 (1.0)    | 6 (0.75)  | 7 (1.0)   |
| Aizoaceae         | <i>Monilaria</i>        | 5   | All  | 5 (1.0)    | 4 (0.75)  | 5 (1.0)   |
| Aizoaceae         | <i>Nananthus</i>        | 6   | All  | 6 (1.0)    | 5 (0.75)  | 6 (1.0)   |
| Aizoaceae         | <i>Oscularia</i>        | 23  | All  | 23 (1.0)   | 18 (0.75) | 23 (1.0)  |
| Aizoaceae         | <i>Pleiospilos</i>      | 4   | All  | 4 (1.0)    | 3 (0.75)  | 4 (1.0)   |
| Aizoaceae         | <i>Prepodesma</i>       | 1   | All  | 1 (1.0)    | 1 (0.75)  | 1 (1.0)   |
| Aizoaceae         | <i>Psammophora</i>      | 4   | All  | 4 (1.0)    | 3 (0.75)  | 4 (1.0)   |
| Aizoaceae         | <i>Rabiea</i>           | 6   | Half | 3 (0.5)    | 2 (0.25)  | 5 (0.75)  |
| Aizoaceae         | <i>Rhinephyllum</i>     | 11  | All  | 11 (1.0)   | 9 (0.75)  | 11 (1.0)  |
| Aizoaceae         | <i>Rhombophyllum</i>    | 5   | All  | 5 (1.0)    | 4 (0.75)  | 5 (1.0)   |
| Aizoaceae         | <i>Ruschia</i>          | 208 | Most | 156 (0.75) | 104 (0.5) | 208 (1.0) |
| Aizoaceae         | <i>Sarcozona</i>        | 2   | All  | 2 (1.0)    | 2 (0.75)  | 2 (1.0)   |
| Aizoaceae         | <i>Schlechteranthus</i> | 15  | All  | 15 (1.0)   | 12 (0.75) | 15 (1.0)  |
| Aizoaceae         | <i>Sesuvium</i>         | 14  | Most | 11 (0.75)  | 7 (0.5)   | 14 (1.0)  |
| Aizoaceae         | <i>Stoeberia</i>        | 7   | All  | 7 (1.0)    | 6 (0.75)  | 7 (1.0)   |
| Aizoaceae         | <i>Tetragonia</i>       | 51  | All  | 51 (1.0)   | 39 (0.75) | 51 (1.0)  |
| Aizoaceae         | <i>Titanopsis</i>       | 4   | All  | 4 (1.0)    | 3 (0.75)  | 4 (1.0)   |
| Aizoaceae         | <i>Trianthera</i>       | 29  | Half | 15 (0.5)   | 8 (0.25)  | 22 (0.75) |
| Aizoaceae         | <i>Trichodiadema</i>    | 32  | All  | 32 (1.0)   | 24 (0.75) | 32 (1.0)  |
| Aizoaceae         | <i>Vanheerdea</i>       | 3   | All  | 3 (1.0)    | 3 (0.75)  | 3 (1.0)   |
| Alismataceae      | <i>Sagittaria</i>       | 39  | All  | 39 (1.0)   | 30 (0.75) | 39 (1.0)  |
| Anacampserotaceae | <i>Anacampseros</i>     | 60  | All  | 60 (1.0)   | 45 (0.75) | 60 (1.0)  |
| Anacampserotaceae | <i>Grahamia</i>         | 1   | All  | 1 (1.0)    | 1 (0.75)  | 1 (1.0)   |
| Anacampserotaceae | <i>Talinopsis</i>       | 1   | All  | 1 (1.0)    | 1 (0.75)  | 1 (1.0)   |
| Apocynaceae       | <i>Apteranthes</i>      | 7   | All  | 7 (1.0)    | 6 (0.75)  | 7 (1.0)   |
| Apocynaceae       | <i>Boucerosia</i>       | 8   | All  | 8 (1.0)    | 6 (0.75)  | 8 (1.0)   |
| Apocynaceae       | <i>Caralluma</i>        | 31  | All  | 31 (1.0)   | 24 (0.75) | 31 (1.0)  |

|               |                       |      |      |            |            |           |
|---------------|-----------------------|------|------|------------|------------|-----------|
| Apocynaceae   | <i>Caudanthera</i>    | 4    | All  | 4 (1.0)    | 3 (0.75)   | 4 (1.0)   |
| Apocynaceae   | <i>Ceropegia</i>      | 442  | Most | 332 (0.75) | 221 (0.5)  | 442 (1.0) |
| Apocynaceae   | <i>Cynanchum</i>      | 261  | Most | 196 (0.75) | 131 (0.5)  | 261 (1.0) |
| Apocynaceae   | <i>Desmidorchis</i>   | 14   | All  | 14 (1.0)   | 11 (0.75)  | 14 (1.0)  |
| Apocynaceae   | <i>Dischidia</i>      | 126  | All  | 126 (1.0)  | 95 (0.75)  | 126 (1.0) |
| Apocynaceae   | <i>Duvalia</i>        | 18   | All  | 18 (1.0)   | 14 (0.75)  | 18 (1.0)  |
| Apocynaceae   | <i>Hoodia</i>         | 13   | All  | 13 (1.0)   | 10 (0.75)  | 13 (1.0)  |
| Apocynaceae   | <i>Hoya</i>           | 545  | Most | 409 (0.75) | 273 (0.5)  | 545 (1.0) |
| Apocynaceae   | <i>Huernia</i>        | 77   | All  | 77 (1.0)   | 58 (0.75)  | 77 (1.0)  |
| Apocynaceae   | <i>Orbea</i>          | 59   | All  | 59 (1.0)   | 45 (0.75)  | 59 (1.0)  |
| Apocynaceae   | <i>Orthanthera</i>    | 6    | Most | 5 (0.75)   | 3 (0.5)    | 6 (1.0)   |
| Apocynaceae   | <i>Pachypodium</i>    | 22   | Most | 17 (0.75)  | 11 (0.5)   | 22 (1.0)  |
| Apocynaceae   | <i>Quaqua</i>         | 20   | All  | 20 (1.0)   | 15 (0.75)  | 20 (1.0)  |
| Apocynaceae   | <i>Stapelia</i>       | 31   | All  | 31 (1.0)   | 24 (0.75)  | 31 (1.0)  |
| Araceae       | <i>Zamioculcas</i>    | 1    | All  | 1 (1.0)    | 1 (0.75)   | 1 (1.0)   |
| Asparagaceae  | <i>Agave</i>          | 283  | Most | 213 (0.75) | 142 (0.5)  | 283 (1.0) |
| Asparagaceae  | <i>Beaucarnea</i>     | 13   | Some | 4 (0.25)   | 1 (0.05)   | 7 (0.5)   |
| Asparagaceae  | <i>Beschorneria</i>   | 8    | All  | 8 (1.0)    | 6 (0.75)   | 8 (1.0)   |
| Asparagaceae  | <i>Dracaena</i>       | 201  | Most | 151 (0.75) | 101 (0.5)  | 201 (1.0) |
| Asparagaceae  | <i>Furcraea</i>       | 26   | All  | 26 (1.0)   | 20 (0.75)  | 26 (1.0)  |
| Asparagaceae  | <i>Hesperaloe</i>     | 8    | All  | 8 (1.0)    | 6 (0.75)   | 8 (1.0)   |
| Asparagaceae  | <i>Yucca</i>          | 51   | Most | 39 (0.75)  | 26 (0.5)   | 51 (1.0)  |
| Asphodelaceae | <i>Aloe</i>           | 587  | All  | 587 (1.0)  | 441 (0.75) | 587 (1.0) |
| Asphodelaceae | <i>Aloiampelos</i>    | 7    | All  | 7 (1.0)    | 6 (0.75)   | 7 (1.0)   |
| Asphodelaceae | <i>Aloidendron</i>    | 7    | All  | 7 (1.0)    | 6 (0.75)   | 7 (1.0)   |
| Asphodelaceae | <i>Aristaloe</i>      | 1    | All  | 1 (1.0)    | 1 (0.75)   | 1 (1.0)   |
| Asphodelaceae | <i>Astroloba</i>      | 12   | All  | 12 (1.0)   | 9 (0.75)   | 12 (1.0)  |
| Asphodelaceae | <i>Bulbine</i>        | 87   | Most | 66 (0.75)  | 44 (0.5)   | 87 (1.0)  |
| Asphodelaceae | <i>Gasteria</i>       | 26   | All  | 26 (1.0)   | 20 (0.75)  | 26 (1.0)  |
| Asphodelaceae | <i>Gonialoe</i>       | 3    | All  | 3 (1.0)    | 3 (0.75)   | 3 (1.0)   |
| Asphodelaceae | <i>Haworthia</i>      | 59   | All  | 59 (1.0)   | 45 (0.75)  | 59 (1.0)  |
| Asphodelaceae | <i>Haworthiopsis</i>  | 19   | All  | 19 (1.0)   | 15 (0.75)  | 19 (1.0)  |
| Asphodelaceae | <i>Kumara</i>         | 2    | All  | 2 (1.0)    | 2 (0.75)   | 2 (1.0)   |
| Asphodelaceae | <i>Tulista</i>        | 4    | All  | 4 (1.0)    | 3 (0.75)   | 4 (1.0)   |
| Asteraceae    | <i>Baculellum</i>     | 1    | All  | 1 (1.0)    | 1 (0.75)   | 1 (1.0)   |
| Asteraceae    | <i>Caputia</i>        | 5    | All  | 5 (1.0)    | 4 (0.75)   | 5 (1.0)   |
| Asteraceae    | <i>Crassothonna</i>   | 14   | All  | 14 (1.0)   | 11 (0.75)  | 14 (1.0)  |
| Asteraceae    | <i>Curio</i>          | 17   | All  | 17 (1.0)   | 13 (0.75)  | 17 (1.0)  |
| Asteraceae    | <i>Kleinia</i>        | 55   | All  | 55 (1.0)   | 42 (0.75)  | 55 (1.0)  |
| Asteraceae    | <i>Othonna</i>        | 86   | Few  | 5 (0.05)   | 1 (0.01)   | 22 (0.25) |
| Asteraceae    | <i>Senecio</i>        | 1450 | Some | 363 (0.25) | 73 (0.05)  | 725 (0.5) |
| Basellaceae   | <i>Anredera</i>       | 12   | All  | 12 (1.0)   | 9 (0.75)   | 12 (1.0)  |
| Basellaceae   | <i>Basella</i>        | 5    | All  | 5 (1.0)    | 4 (0.75)   | 5 (1.0)   |
| Basellaceae   | <i>Ullucus</i>        | 1    | All  | 1 (1.0)    | 1 (0.75)   | 1 (1.0)   |
| Bromeliaceae  | <i>Acanthostachys</i> | 3    | Half | 2 (0.5)    | 1 (0.25)   | 3 (0.75)  |
| Bromeliaceae  | <i>Aechmea</i>        | 251  | All  | 251 (1.0)  | 189 (0.75) | 251 (1.0) |
| Bromeliaceae  | <i>Ananas</i>         | 2    | All  | 2 (1.0)    | 2 (0.75)   | 2 (1.0)   |

|              |                         |     |      |            |            |           |
|--------------|-------------------------|-----|------|------------|------------|-----------|
| Bromeliaceae | <i>Androlepis</i>       | 3   | All  | 3 (1.0)    | 3 (0.75)   | 3 (1.0)   |
| Bromeliaceae | <i>Araeococcus</i>      | 4   | All  | 4 (1.0)    | 3 (0.75)   | 4 (1.0)   |
| Bromeliaceae | <i>Billbergia</i>       | 62  | All  | 62 (1.0)   | 47 (0.75)  | 62 (1.0)  |
| Bromeliaceae | <i>Bromelia</i>         | 70  | All  | 70 (1.0)   | 53 (0.75)  | 70 (1.0)  |
| Bromeliaceae | <i>Canistropsis</i>     | 10  | All  | 10 (1.0)   | 8 (0.75)   | 10 (1.0)  |
| Bromeliaceae | <i>Canistrum</i>        | 14  | All  | 14 (1.0)   | 11 (0.75)  | 14 (1.0)  |
| Bromeliaceae | <i>Cipuropsis</i>       | 12  | Some | 3 (0.25)   | 1 (0.05)   | 6 (0.5)   |
| Bromeliaceae | <i>Cryptanthus</i>      | 61  | Most | 46 (0.75)  | 31 (0.5)   | 61 (1.0)  |
| Bromeliaceae | <i>Deinacanthon</i>     | 1   | All  | 1 (1.0)    | 1 (0.75)   | 1 (1.0)   |
| Bromeliaceae | <i>Deuterocohnia</i>    | 16  | All  | 16 (1.0)   | 12 (0.75)  | 16 (1.0)  |
| Bromeliaceae | <i>Disteganthus</i>     | 4   | All  | 4 (1.0)    | 3 (0.75)   | 4 (1.0)   |
| Bromeliaceae | <i>Dyckia</i>           | 181 | All  | 181 (1.0)  | 136 (0.75) | 181 (1.0) |
| Bromeliaceae | <i>Edmundoa</i>         | 3   | All  | 3 (1.0)    | 3 (0.75)   | 3 (1.0)   |
| Bromeliaceae | <i>Eduandrea</i>        | 1   | All  | 1 (1.0)    | 1 (0.75)   | 1 (1.0)   |
| Bromeliaceae | <i>Encholirium</i>      | 33  | All  | 33 (1.0)   | 25 (0.75)  | 33 (1.0)  |
| Bromeliaceae | <i>Forzzaea</i>         | 7   | All  | 7 (1.0)    | 6 (0.75)   | 7 (1.0)   |
| Bromeliaceae | <i>Guzmania</i>         | 208 | Some | 52 (0.25)  | 11 (0.05)  | 104 (0.5) |
| Bromeliaceae | <i>Hechtia</i>          | 87  | All  | 87 (1.0)   | 66 (0.75)  | 87 (1.0)  |
| Bromeliaceae | <i>Hohenbergia</i>      | 51  | All  | 51 (1.0)   | 39 (0.75)  | 51 (1.0)  |
| Bromeliaceae | <i>Hohenbergiopsis</i>  | 1   | All  | 1 (1.0)    | 1 (0.75)   | 1 (1.0)   |
| Bromeliaceae | <i>Hylaeaicum</i>       | 12  | All  | 12 (1.0)   | 9 (0.75)   | 12 (1.0)  |
| Bromeliaceae | <i>Karawata</i>         | 7   | All  | 7 (1.0)    | 6 (0.75)   | 7 (1.0)   |
| Bromeliaceae | <i>Lemeltonia</i>       | 7   | Few  | 1 (0.05)   | 1 (0.01)   | 2 (0.25)  |
| Bromeliaceae | <i>Lymania</i>          | 10  | All  | 10 (1.0)   | 8 (0.75)   | 10 (1.0)  |
| Bromeliaceae | <i>Neoglaziovia</i>     | 3   | All  | 3 (1.0)    | 3 (0.75)   | 3 (1.0)   |
| Bromeliaceae | <i>Neoregelia</i>       | 113 | All  | 113 (1.0)  | 85 (0.75)  | 113 (1.0) |
| Bromeliaceae | <i>Nidularium</i>       | 46  | Most | 35 (0.75)  | 23 (0.5)   | 46 (1.0)  |
| Bromeliaceae | <i>Orthophytum</i>      | 67  | All  | 67 (1.0)   | 51 (0.75)  | 67 (1.0)  |
| Bromeliaceae | <i>Portea</i>           | 8   | All  | 8 (1.0)    | 6 (0.75)   | 8 (1.0)   |
| Bromeliaceae | <i>Pseudaraeococcus</i> | 6   | All  | 6 (1.0)    | 5 (0.75)   | 6 (1.0)   |
| Bromeliaceae | <i>Puya</i>             | 230 | Some | 58 (0.25)  | 12 (0.05)  | 115 (0.5) |
| Bromeliaceae | <i>Quesnelia</i>        | 24  | All  | 24 (1.0)   | 18 (0.75)  | 24 (1.0)  |
| Bromeliaceae | <i>Ronnbergia</i>       | 20  | Most | 15 (0.75)  | 10 (0.5)   | 20 (1.0)  |
| Bromeliaceae | <i>Sincoraea</i>        | 11  | Most | 9 (0.75)   | 6 (0.5)    | 11 (1.0)  |
| Bromeliaceae | <i>Tillandsia</i>       | 649 | Most | 487 (0.75) | 325 (0.5)  | 649 (1.0) |
| Bromeliaceae | <i>Werauhia</i>         | 94  | Some | 24 (0.25)  | 5 (0.05)   | 47 (0.5)  |
| Bromeliaceae | <i>Wittrockia</i>       | 5   | Most | 4 (0.75)   | 3 (0.5)    | 5 (1.0)   |
| Cactaceae    | <i>Acanthocalycium</i>  | 4   | All  | 4 (1.0)    | 3 (0.75)   | 4 (1.0)   |
| Cactaceae    | <i>Acanthocereus</i>    | 16  | All  | 16 (1.0)   | 12 (0.75)  | 16 (1.0)  |
| Cactaceae    | <i>Acharagma</i>        | 2   | All  | 2 (1.0)    | 2 (0.75)   | 2 (1.0)   |
| Cactaceae    | <i>Airampoa</i>         | 4   | All  | 4 (1.0)    | 3 (0.75)   | 4 (1.0)   |
| Cactaceae    | <i>Aporocactus</i>      | 2   | All  | 2 (1.0)    | 2 (0.75)   | 2 (1.0)   |
| Cactaceae    | <i>Ariocarpus</i>       | 7   | All  | 7 (1.0)    | 6 (0.75)   | 7 (1.0)   |
| Cactaceae    | <i>Armatocereus</i>     | 8   | All  | 8 (1.0)    | 6 (0.75)   | 8 (1.0)   |
| Cactaceae    | <i>Arrojadoa</i>        | 10  | All  | 10 (1.0)   | 8 (0.75)   | 10 (1.0)  |
| Cactaceae    | <i>Arthrocerus</i>      | 4   | All  | 4 (1.0)    | 3 (0.75)   | 4 (1.0)   |
| Cactaceae    | <i>Astrophytum</i>      | 6   | All  | 6 (1.0)    | 5 (0.75)   | 6 (1.0)   |

|           |                             |    |     |          |           |          |
|-----------|-----------------------------|----|-----|----------|-----------|----------|
| Cactaceae | <i>Austrocactus</i>         | 9  | All | 9 (1.0)  | 7 (0.75)  | 9 (1.0)  |
| Cactaceae | <i>Austrocylindropuntia</i> | 7  | All | 7 (1.0)  | 6 (0.75)  | 7 (1.0)  |
| Cactaceae | <i>Aylostera</i>            | 27 | All | 27 (1.0) | 21 (0.75) | 27 (1.0) |
| Cactaceae | <i>Aztekium</i>             | 2  | All | 2 (1.0)  | 2 (0.75)  | 2 (1.0)  |
| Cactaceae | <i>Bergerocactus</i>        | 1  | All | 1 (1.0)  | 1 (0.75)  | 1 (1.0)  |
| Cactaceae | <i>Blossfeldia</i>          | 1  | All | 1 (1.0)  | 1 (0.75)  | 1 (1.0)  |
| Cactaceae | <i>Borzicactus</i>          | 10 | All | 10 (1.0) | 8 (0.75)  | 10 (1.0) |
| Cactaceae | <i>Brachycereus</i>         | 1  | All | 1 (1.0)  | 1 (0.75)  | 1 (1.0)  |
| Cactaceae | <i>Brasilicereus</i>        | 3  | All | 3 (1.0)  | 3 (0.75)  | 3 (1.0)  |
| Cactaceae | <i>Brasiliopuntia</i>       | 1  | All | 1 (1.0)  | 1 (0.75)  | 1 (1.0)  |
| Cactaceae | <i>Browningia</i>           | 11 | All | 11 (1.0) | 9 (0.75)  | 11 (1.0) |
| Cactaceae | <i>Calymmanthium</i>        | 1  | All | 1 (1.0)  | 1 (0.75)  | 1 (1.0)  |
| Cactaceae | <i>Carnegiea</i>            | 1  | All | 1 (1.0)  | 1 (0.75)  | 1 (1.0)  |
| Cactaceae | <i>Castellanosia</i>        | 1  | All | 1 (1.0)  | 1 (0.75)  | 1 (1.0)  |
| Cactaceae | <i>Cephalocereus</i>        | 13 | All | 13 (1.0) | 10 (0.75) | 13 (1.0) |
| Cactaceae | <i>Cereus</i>               | 25 | All | 25 (1.0) | 19 (0.75) | 25 (1.0) |
| Cactaceae | <i>Chamaecereus</i>         | 5  | All | 5 (1.0)  | 4 (0.75)  | 5 (1.0)  |
| Cactaceae | <i>Chichimecactus</i>       | 1  | All | 1 (1.0)  | 1 (0.75)  | 1 (1.0)  |
| Cactaceae | <i>Cipocereus</i>           | 6  | All | 6 (1.0)  | 5 (0.75)  | 6 (1.0)  |
| Cactaceae | <i>Cleistocactus</i>        | 25 | All | 25 (1.0) | 19 (0.75) | 25 (1.0) |
| Cactaceae | <i>Cochemia</i>             | 36 | All | 36 (1.0) | 27 (0.75) | 36 (1.0) |
| Cactaceae | <i>Coleocephalocereus</i>   | 8  | All | 8 (1.0)  | 6 (0.75)  | 8 (1.0)  |
| Cactaceae | <i>Consolea</i>             | 7  | All | 7 (1.0)  | 6 (0.75)  | 7 (1.0)  |
| Cactaceae | <i>Copiapoa</i>             | 37 | All | 37 (1.0) | 28 (0.75) | 37 (1.0) |
| Cactaceae | <i>Corryocactus</i>         | 15 | All | 15 (1.0) | 12 (0.75) | 15 (1.0) |
| Cactaceae | <i>Coryphantha</i>          | 43 | All | 43 (1.0) | 33 (0.75) | 43 (1.0) |
| Cactaceae | <i>Cremonocereus</i>        | 1  | All | 1 (1.0)  | 1 (0.75)  | 1 (1.0)  |
| Cactaceae | <i>Cumarinia</i>            | 1  | All | 1 (1.0)  | 1 (0.75)  | 1 (1.0)  |
| Cactaceae | <i>Cumulopuntia</i>         | 14 | All | 14 (1.0) | 11 (0.75) | 14 (1.0) |
| Cactaceae | <i>Cylindropuntia</i>       | 41 | All | 41 (1.0) | 31 (0.75) | 41 (1.0) |
| Cactaceae | <i>Deamia</i>               | 2  | All | 2 (1.0)  | 2 (0.75)  | 2 (1.0)  |
| Cactaceae | <i>Denmoza</i>              | 1  | All | 1 (1.0)  | 1 (0.75)  | 1 (1.0)  |
| Cactaceae | <i>Discocactus</i>          | 14 | All | 14 (1.0) | 11 (0.75) | 14 (1.0) |
| Cactaceae | <i>Disocactus</i>           | 15 | All | 15 (1.0) | 12 (0.75) | 15 (1.0) |
| Cactaceae | <i>Echinocactus</i>         | 5  | All | 5 (1.0)  | 4 (0.75)  | 5 (1.0)  |
| Cactaceae | <i>Echinocereus</i>         | 73 | All | 73 (1.0) | 55 (0.75) | 73 (1.0) |
| Cactaceae | <i>Echinopsis</i>           | 20 | All | 20 (1.0) | 15 (0.75) | 20 (1.0) |
| Cactaceae | <i>Epiphyllum</i>           | 10 | All | 10 (1.0) | 8 (0.75)  | 10 (1.0) |
| Cactaceae | <i>Epithelantha</i>         | 10 | All | 10 (1.0) | 8 (0.75)  | 10 (1.0) |
| Cactaceae | <i>Eriogyne</i>             | 56 | All | 56 (1.0) | 42 (0.75) | 56 (1.0) |
| Cactaceae | <i>Escontria</i>            | 1  | All | 1 (1.0)  | 1 (0.75)  | 1 (1.0)  |
| Cactaceae | <i>Espostoa</i>             | 11 | All | 11 (1.0) | 9 (0.75)  | 11 (1.0) |
| Cactaceae | <i>Espositoopsis</i>        | 1  | All | 1 (1.0)  | 1 (0.75)  | 1 (1.0)  |
| Cactaceae | <i>Eulychnia</i>            | 8  | All | 8 (1.0)  | 6 (0.75)  | 8 (1.0)  |
| Cactaceae | <i>Facheiroa</i>            | 4  | All | 4 (1.0)  | 3 (0.75)  | 4 (1.0)  |
| Cactaceae | <i>Ferocactus</i>           | 30 | All | 30 (1.0) | 23 (0.75) | 30 (1.0) |
| Cactaceae | <i>Frailea</i>              | 19 | All | 19 (1.0) | 15 (0.75) | 19 (1.0) |

|           |                        |     |     |           |            |           |
|-----------|------------------------|-----|-----|-----------|------------|-----------|
| Cactaceae | <i>Geohintonia</i>     | 1   | All | 1 (1.0)   | 1 (0.75)   | 1 (1.0)   |
| Cactaceae | <i>Grusonia</i>        | 20  | All | 20 (1.0)  | 15 (0.75)  | 20 (1.0)  |
| Cactaceae | <i>Gymnocalycium</i>   | 66  | All | 66 (1.0)  | 50 (0.75)  | 66 (1.0)  |
| Cactaceae | <i>Haageocereus</i>    | 10  | All | 10 (1.0)  | 8 (0.75)   | 10 (1.0)  |
| Cactaceae | <i>Harrisia</i>        | 18  | All | 18 (1.0)  | 14 (0.75)  | 18 (1.0)  |
| Cactaceae | <i>Hattiora</i>        | 3   | All | 3 (1.0)   | 3 (0.75)   | 3 (1.0)   |
| Cactaceae | <i>Isolatocereus</i>   | 1   | All | 1 (1.0)   | 1 (0.75)   | 1 (1.0)   |
| Cactaceae | <i>Jasminocereus</i>   | 1   | All | 1 (1.0)   | 1 (0.75)   | 1 (1.0)   |
| Cactaceae | <i>Kadenicarpus</i>    | 3   | All | 3 (1.0)   | 3 (0.75)   | 3 (1.0)   |
| Cactaceae | <i>Kroenleinia</i>     | 1   | All | 1 (1.0)   | 1 (0.75)   | 1 (1.0)   |
| Cactaceae | <i>Lagenosocereus</i>  | 1   | All | 1 (1.0)   | 1 (0.75)   | 1 (1.0)   |
| Cactaceae | <i>Lasiocereus</i>     | 2   | All | 2 (1.0)   | 2 (0.75)   | 2 (1.0)   |
| Cactaceae | <i>Lemaireocereus</i>  | 2   | All | 2 (1.0)   | 2 (0.75)   | 2 (1.0)   |
| Cactaceae | <i>Leocereus</i>       | 1   | All | 1 (1.0)   | 1 (0.75)   | 1 (1.0)   |
| Cactaceae | <i>Lepismium</i>       | 7   | All | 7 (1.0)   | 6 (0.75)   | 7 (1.0)   |
| Cactaceae | <i>Leptocereus</i>     | 15  | All | 15 (1.0)  | 12 (0.75)  | 15 (1.0)  |
| Cactaceae | <i>Leuchtenbergia</i>  | 1   | All | 1 (1.0)   | 1 (0.75)   | 1 (1.0)   |
| Cactaceae | <i>Leucostele</i>      | 13  | All | 13 (1.0)  | 10 (0.75)  | 13 (1.0)  |
| Cactaceae | <i>Leuenbergeria</i>   | 8   | All | 8 (1.0)   | 6 (0.75)   | 8 (1.0)   |
| Cactaceae | <i>Lobivia</i>         | 28  | All | 28 (1.0)  | 21 (0.75)  | 28 (1.0)  |
| Cactaceae | <i>Lophocereus</i>     | 3   | All | 3 (1.0)   | 3 (0.75)   | 3 (1.0)   |
| Cactaceae | <i>Lophophora</i>      | 4   | All | 4 (1.0)   | 3 (0.75)   | 4 (1.0)   |
| Cactaceae | <i>Loxanthocereus</i>  | 13  | All | 13 (1.0)  | 10 (0.75)  | 13 (1.0)  |
| Cactaceae | <i>Lymanbensonia</i>   | 5   | All | 5 (1.0)   | 4 (0.75)   | 5 (1.0)   |
| Cactaceae | <i>Maihuenia</i>       | 2   | All | 2 (1.0)   | 2 (0.75)   | 2 (1.0)   |
| Cactaceae | <i>Maihueniopsis</i>   | 20  | All | 20 (1.0)  | 15 (0.75)  | 20 (1.0)  |
| Cactaceae | <i>Mammillaria</i>     | 139 | All | 139 (1.0) | 105 (0.75) | 139 (1.0) |
| Cactaceae | <i>Marshallocereus</i> | 1   | All | 1 (1.0)   | 1 (0.75)   | 1 (1.0)   |
| Cactaceae | <i>Matucana</i>        | 17  | All | 17 (1.0)  | 13 (0.75)  | 17 (1.0)  |
| Cactaceae | <i>Melocactus</i>      | 41  | All | 41 (1.0)  | 31 (0.75)  | 41 (1.0)  |
| Cactaceae | <i>Micranthocereus</i> | 11  | All | 11 (1.0)  | 9 (0.75)   | 11 (1.0)  |
| Cactaceae | <i>Mila</i>            | 1   | All | 1 (1.0)   | 1 (0.75)   | 1 (1.0)   |
| Cactaceae | <i>Miqueliopuntia</i>  | 1   | All | 1 (1.0)   | 1 (0.75)   | 1 (1.0)   |
| Cactaceae | <i>Mirabella</i>       | 3   | All | 3 (1.0)   | 3 (0.75)   | 3 (1.0)   |
| Cactaceae | <i>Mitrocereus</i>     | 1   | All | 1 (1.0)   | 1 (0.75)   | 1 (1.0)   |
| Cactaceae | <i>Morangaya</i>       | 1   | All | 1 (1.0)   | 1 (0.75)   | 1 (1.0)   |
| Cactaceae | <i>Myrtillocactus</i>  | 4   | All | 4 (1.0)   | 3 (0.75)   | 4 (1.0)   |
| Cactaceae | <i>Neoraimondia</i>    | 2   | All | 2 (1.0)   | 2 (0.75)   | 2 (1.0)   |
| Cactaceae | <i>Neowerdermannia</i> | 2   | All | 2 (1.0)   | 2 (0.75)   | 2 (1.0)   |
| Cactaceae | <i>Nyctocereus</i>     | 1   | All | 1 (1.0)   | 1 (0.75)   | 1 (1.0)   |
| Cactaceae | <i>Obregonia</i>       | 1   | All | 1 (1.0)   | 1 (0.75)   | 1 (1.0)   |
| Cactaceae | <i>Opuntia</i>         | 136 | All | 136 (1.0) | 102 (0.75) | 136 (1.0) |
| Cactaceae | <i>Oreocereus</i>      | 8   | All | 8 (1.0)   | 6 (0.75)   | 8 (1.0)   |
| Cactaceae | <i>Oroya</i>           | 2   | All | 2 (1.0)   | 2 (0.75)   | 2 (1.0)   |
| Cactaceae | <i>Pachycereus</i>     | 6   | All | 6 (1.0)   | 5 (0.75)   | 6 (1.0)   |
| Cactaceae | <i>Parodia</i>         | 65  | All | 65 (1.0)  | 49 (0.75)  | 65 (1.0)  |
| Cactaceae | <i>Pediocactus</i>     | 7   | All | 7 (1.0)   | 6 (0.75)   | 7 (1.0)   |

|               |                          |     |      |            |           |                         |
|---------------|--------------------------|-----|------|------------|-----------|-------------------------|
| Cactaceae     | <i>Pelecyphora</i>       | 20  | All  | 20 (1.0)   | 15 (0.75) | 20 (1.0)                |
| Cactaceae     | <i>Peniocereus</i>       | 8   | All  | 8 (1.0)    | 6 (0.75)  | 8 (1.0)                 |
| Cactaceae     | <i>Pereskia</i>          | 4   | All  | 4 (1.0)    | 3 (0.75)  | 4 (1.0)                 |
| Cactaceae     | <i>Peresklopsis</i>      | 7   | All  | 7 (1.0)    | 6 (0.75)  | 7 (1.0)                 |
| Cactaceae     | <i>Pfeiffera</i>         | 6   | All  | 6 (1.0)    | 5 (0.75)  | 6 (1.0)                 |
| Cactaceae     | <i>Pilosocereus</i>      | 55  | All  | 55 (1.0)   | 42 (0.75) | 55 (1.0)                |
| Cactaceae     | <i>Polaskia</i>          | 2   | All  | 2 (1.0)    | 2 (0.75)  | 2 (1.0)                 |
| Cactaceae     | <i>Praecereus</i>        | 2   | All  | 2 (1.0)    | 2 (0.75)  | 2 (1.0)                 |
| Cactaceae     | <i>Pseudorhipsalis</i>   | 6   | All  | 6 (1.0)    | 5 (0.75)  | 6 (1.0)                 |
| Cactaceae     | <i>Pterocactus</i>       | 10  | All  | 10 (1.0)   | 8 (0.75)  | 10 (1.0)                |
| Cactaceae     | <i>Pterocereus</i>       | 1   | All  | 1 (1.0)    | 1 (0.75)  | 1 (1.0)                 |
| Cactaceae     | <i>Punotia</i>           | 1   | All  | 1 (1.0)    | 1 (0.75)  | 1 (1.0)                 |
| Cactaceae     | <i>Quiabentia</i>        | 2   | All  | 2 (1.0)    | 2 (0.75)  | 2 (1.0)                 |
| Cactaceae     | <i>Rapicactus</i>        | 4   | All  | 4 (1.0)    | 3 (0.75)  | 4 (1.0)                 |
| Cactaceae     | <i>Rauhocereus</i>       | 1   | All  | 1 (1.0)    | 1 (0.75)  | 1 (1.0)                 |
| Cactaceae     | <i>Rebutia</i>           | 19  | All  | 19 (1.0)   | 15 (0.75) | 19 (1.0)                |
| Cactaceae     | <i>Reicheocactus</i>     | 1   | All  | 1 (1.0)    | 1 (0.75)  | 1 (1.0)                 |
| Cactaceae     | <i>Rhipsalidopsis</i>    | 2   | All  | 2 (1.0)    | 2 (0.75)  | 2 (1.0)                 |
| Cactaceae     | <i>Rhipsalis</i>         | 45  | All  | 45 (1.0)   | 34 (0.75) | 45 (1.0)                |
| Cactaceae     | <i>Rhodocactus</i>       | 5   | All  | 5 (1.0)    | 4 (0.75)  | 5 (1.0)                 |
| Cactaceae     | <i>Salmonopuntia</i>     | 2   | All  | 2 (1.0)    | 2 (0.75)  | 2 (1.0)                 |
| Cactaceae     | <i>Samaipaticereus</i>   | 1   | All  | 1 (1.0)    | 1 (0.75)  | 1 (1.0)                 |
| Cactaceae     | <i>Schlumbergera</i>     | 7   | All  | 7 (1.0)    | 6 (0.75)  | 7 (1.0)                 |
| Cactaceae     | <i>Sclerocactus</i>      | 22  | All  | 22 (1.0)   | 17 (0.75) | 22 (1.0)                |
| Cactaceae     | <i>Selenicereus</i>      | 31  | All  | 31 (1.0)   | 24 (0.75) | 31 (1.0)                |
| Cactaceae     | <i>Setiechinopsis</i>    | 1   | All  | 1 (1.0)    | 1 (0.75)  | 1 (1.0)                 |
| Cactaceae     | <i>Soehrensia</i>        | 24  | All  | 24 (1.0)   | 18 (0.75) | 24 (1.0)                |
| Cactaceae     | <i>Stenocactus</i>       | 9   | All  | 9 (1.0)    | 7 (0.75)  | 9 (1.0)                 |
| Cactaceae     | <i>Stenocereus</i>       | 21  | All  | 21 (1.0)   | 16 (0.75) | 21 (1.0)                |
| Cactaceae     | <i>Stetsonia</i>         | 1   | All  | 1 (1.0)    | 1 (0.75)  | 1 (1.0)                 |
| Cactaceae     | <i>Strombocactus</i>     | 1   | All  | 1 (1.0)    | 1 (0.75)  | 1 (1.0)                 |
| Cactaceae     | <i>Strophocactus</i>     | 3   | All  | 3 (1.0)    | 3 (0.75)  | 3 (1.0)                 |
| Cactaceae     | <i>Tacinga</i>           | 10  | All  | 10 (1.0)   | 8 (0.75)  | 10 (1.0)                |
| Cactaceae     | <i>Tephrocactus</i>      | 10  | All  | 10 (1.0)   | 8 (0.75)  | 10 (1.0)                |
| Cactaceae     | <i>Thelocactus</i>       | 13  | All  | 13 (1.0)   | 10 (0.75) | 13 (1.0)                |
| Cactaceae     | <i>Trichocereus</i>      | 3   | All  | 3 (1.0)    | 3 (0.75)  | 3 (1.0)                 |
| Cactaceae     | <i>Turbincarpus</i>      | 14  | All  | 14 (1.0)   | 11 (0.75) | 14 (1.0)                |
| Cactaceae     | <i>Uebelmannia</i>       | 3   | All  | 3 (1.0)    | 3 (0.75)  | 3 (1.0)                 |
| Cactaceae     | <i>Vatricania</i>        | 1   | All  | 1 (1.0)    | 1 (0.75)  | 1 (1.0)                 |
| Cactaceae     | <i>Weberbauerocereus</i> | 8   | All  | 8 (1.0)    | 6 (0.75)  | 8 (1.0)                 |
| Cactaceae     | <i>Weberocereus</i>      | 8   | All  | 8 (1.0)    | 6 (0.75)  | 8 (1.0)                 |
| Cactaceae     | <i>Xiquexique</i>        | 3   | All  | 3 (1.0)    | 3 (0.75)  | 3 (1.0)                 |
| Cactaceae     | <i>Yavia</i>             | 1   | All  | 1 (1.0)    | 1 (0.75)  | 1 (1.0)                 |
| Cactaceae     | <i>Yungasocereus</i>     | 1   | All  | 1 (1.0)    | 1 (0.75)  | 1 (1.0)                 |
| Clusiaceae    | <i>Clusia</i>            | 322 | Most | 242 (0.75) | 161 (0.5) | 306 (0.95) <sup>1</sup> |
| Commelinaceae | <i>Callisia</i>          | 41  | Most | 31 (0.75)  | 21 (0.5)  | 41 (1.0)                |
| Commelinaceae | <i>Cyanotis</i>          | 50  | Most | 38 (0.75)  | 25 (0.5)  | 50 (1.0)                |



|               |                       |      |      |             |            |            |
|---------------|-----------------------|------|------|-------------|------------|------------|
| Commelinaceae | <i>Tradescantia</i>   | 85   | Most | 64 (0.75)   | 43 (0.5)   | 85 (1.0)   |
| Crassulaceae  | <i>Adromischus</i>    | 29   | All  | 29 (1.0)    | 22 (0.75)  | 29 (1.0)   |
| Crassulaceae  | <i>Aeonium</i>        | 41   | All  | 41 (1.0)    | 31 (0.75)  | 41 (1.0)   |
| Crassulaceae  | <i>Afrovivella</i>    | 1    | All  | 1 (1.0)     | 1 (0.75)   | 1 (1.0)    |
| Crassulaceae  | <i>Aichryson</i>      | 16   | All  | 16 (1.0)    | 12 (0.75)  | 16 (1.0)   |
| Crassulaceae  | <i>Chaloupkaea</i>    | 8    | All  | 8 (1.0)     | 6 (0.75)   | 8 (1.0)    |
| Crassulaceae  | <i>Chiastophyllum</i> | 1    | All  | 1 (1.0)     | 1 (0.75)   | 1 (1.0)    |
| Crassulaceae  | <i>Cotyledon</i>      | 18   | All  | 18 (1.0)    | 14 (0.75)  | 18 (1.0)   |
| Crassulaceae  | <i>Crassula</i>       | 210  | All  | 210 (1.0)   | 158 (0.75) | 210 (1.0)  |
| Crassulaceae  | <i>Cremnophila</i>    | 3    | All  | 3 (1.0)     | 3 (0.75)   | 3 (1.0)    |
| Crassulaceae  | <i>Dudleya</i>        | 46   | All  | 46 (1.0)    | 35 (0.75)  | 46 (1.0)   |
| Crassulaceae  | <i>Echeveria</i>      | 199  | All  | 199 (1.0)   | 150 (0.75) | 199 (1.0)  |
| Crassulaceae  | <i>Graptopetalum</i>  | 19   | All  | 19 (1.0)    | 15 (0.75)  | 19 (1.0)   |
| Crassulaceae  | <i>Hylotelephium</i>  | 26   | All  | 26 (1.0)    | 20 (0.75)  | 26 (1.0)   |
| Crassulaceae  | <i>Hypagophytum</i>   | 1    | All  | 1 (1.0)     | 1 (0.75)   | 1 (1.0)    |
| Crassulaceae  | <i>Kalanchoë</i>      | 165  | All  | 165 (1.0)   | 124 (0.75) | 165 (1.0)  |
| Crassulaceae  | <i>Kungia</i>         | 2    | All  | 2 (1.0)     | 2 (0.75)   | 2 (1.0)    |
| Crassulaceae  | <i>Lenophyllum</i>    | 7    | All  | 7 (1.0)     | 6 (0.75)   | 7 (1.0)    |
| Crassulaceae  | <i>Meterostachys</i>  | 1    | All  | 1 (1.0)     | 1 (0.75)   | 1 (1.0)    |
| Crassulaceae  | <i>Monanthes</i>      | 18   | All  | 18 (1.0)    | 14 (0.75)  | 18 (1.0)   |
| Crassulaceae  | <i>Orostachys</i>     | 12   | All  | 12 (1.0)    | 9 (0.75)   | 12 (1.0)   |
| Crassulaceae  | <i>Pachyphytum</i>    | 23   | All  | 23 (1.0)    | 18 (0.75)  | 23 (1.0)   |
| Crassulaceae  | <i>Perrierosedum</i>  | 1    | All  | 1 (1.0)     | 1 (0.75)   | 1 (1.0)    |
| Crassulaceae  | <i>Petrosedum</i>     | 14   | All  | 14 (1.0)    | 11 (0.75)  | 14 (1.0)   |
| Crassulaceae  | <i>Phedimus</i>       | 17   | All  | 17 (1.0)    | 13 (0.75)  | 17 (1.0)   |
| Crassulaceae  | <i>Pistorinia</i>     | 4    | All  | 4 (1.0)     | 3 (0.75)   | 4 (1.0)    |
| Crassulaceae  | <i>Prometheum</i>     | 3    | All  | 3 (1.0)     | 3 (0.75)   | 3 (1.0)    |
| Crassulaceae  | <i>Pseudosedum</i>    | 14   | All  | 14 (1.0)    | 11 (0.75)  | 14 (1.0)   |
| Crassulaceae  | <i>Rhodiola</i>       | 69   | All  | 69 (1.0)    | 52 (0.75)  | 69 (1.0)   |
| Crassulaceae  | <i>Rosularia</i>      | 23   | All  | 23 (1.0)    | 18 (0.75)  | 23 (1.0)   |
| Crassulaceae  | <i>Sedum</i>          | 464  | All  | 464 (1.0)   | 348 (0.75) | 464 (1.0)  |
| Crassulaceae  | <i>Sempervivum</i>    | 52   | All  | 52 (1.0)    | 39 (0.75)  | 52 (1.0)   |
| Crassulaceae  | <i>Sinocrassula</i>   | 11   | All  | 11 (1.0)    | 9 (0.75)   | 11 (1.0)   |
| Crassulaceae  | <i>Thompsonella</i>   | 8    | All  | 8 (1.0)     | 6 (0.75)   | 8 (1.0)    |
| Crassulaceae  | <i>Tylecodon</i>      | 50   | All  | 50 (1.0)    | 38 (0.75)  | 50 (1.0)   |
| Crassulaceae  | <i>Umbilicus</i>      | 16   | All  | 16 (1.0)    | 12 (0.75)  | 16 (1.0)   |
| Crassulaceae  | <i>Villadia</i>       | 29   | All  | 29 (1.0)    | 22 (0.75)  | 29 (1.0)   |
| Cucurbitaceae | <i>Seyrigia</i>       | 6    | All  | 6 (1.0)     | 5 (0.75)   | 6 (1.0)    |
| Cucurbitaceae | <i>Xerosicyos</i>     | 6    | All  | 6 (1.0)     | 5 (0.75)   | 6 (1.0)    |
| Didiereaceae  | <i>Alluaudia</i>      | 6    | All  | 6 (1.0)     | 5 (0.75)   | 6 (1.0)    |
| Didiereaceae  | <i>Allaudiopsis</i>   | 2    | All  | 2 (1.0)     | 2 (0.75)   | 2 (1.0)    |
| Didiereaceae  | <i>Calyptrotheca</i>  | 2    | All  | 2 (1.0)     | 2 (0.75)   | 2 (1.0)    |
| Didiereaceae  | <i>Decarya</i>        | 1    | All  | 1 (1.0)     | 1 (0.75)   | 1 (1.0)    |
| Didiereaceae  | <i>Didierea</i>       | 2    | All  | 2 (1.0)     | 2 (0.75)   | 2 (1.0)    |
| Didiereaceae  | <i>Portulacaria</i>   | 7    | All  | 7 (1.0)     | 6 (0.75)   | 7 (1.0)    |
| Euphorbiaceae | <i>Euphorbia</i>      | 2087 | Most | 1566 (0.75) | 1044 (0.5) | 2087 (1.0) |
| Euphorbiaceae | <i>Jatropha</i>       | 175  | Few  | 9 (0.05)    | 2 (0.01)   | 44 (0.25)  |

|                  |                       |      |      |             |            |                        |
|------------------|-----------------------|------|------|-------------|------------|------------------------|
| Geraniaceae      | <i>Monsonia</i>       | 26   | Some | 7 (0.25)    | 2 (0.05)   | 13 (0.5)               |
| Geraniaceae      | <i>Pelargonium</i>    | 285  | Some | 72 (0.25)   | 15 (0.05)  | 143 (0.5)              |
| Gesneriaceae     | <i>Codonanthe</i>     | 9    | All  | 9 (1.0)     | 7 (0.75)   | 9 (1.0)                |
| Gesneriaceae     | <i>Codonanthopsis</i> | 13   | All  | 13 (1.0)    | 10 (0.75)  | 13 (1.0)               |
| Gesneriaceae     | <i>Haberlea</i>       | 1    | All  | 1 (1.0)     | 1 (0.75)   | 1 (1.0)                |
| Gesneriaceae     | <i>Ramonda</i>        | 4    | All  | 4 (1.0)     | 3 (0.75)   | 4 (1.0)                |
| Halophytaceae    | <i>Halophytum</i>     | 1    | All  | 1 (1.0)     | 1 (0.75)   | 1 (1.0)                |
| Hydrocharitaceae | <i>Ottelia</i>        | 22   | Most | 17 (0.75)   | 11 (0.5)   | 22 (1.0)               |
| Hydrocharitaceae | <i>Vallisneria</i>    | 14   | All  | 14 (1.0)    | 11 (0.75)  | 14 (1.0)               |
| Isoëtaceae       | <i>Isoëtes</i>        | 193  | All  | 193 (1.0)   | 145 (0.75) | 193 (1.0)              |
| Lamiaceae        | <i>Coleus</i>         | 301  | Some | 76 (0.25)   | 16 (0.05)  | 151 (0.5)              |
| Lamiaceae        | <i>Marrubium</i>      | 51   | Few  | 3 (0.05)    | 1 (0.01)   | 13 (0.25)              |
| Montiaceae       | <i>Calandrinia</i>    | 37   | Most | 28 (0.75)   | 19 (0.5)   | 37 (1.0)               |
| Montiaceae       | <i>Calyptridium</i>   | 11   | All  | 11 (1.0)    | 9 (0.75)   | 11 (1.0)               |
| Montiaceae       | <i>Cistanthe</i>      | 43   | Most | 33 (0.75)   | 22 (0.5)   | 43 (1.0)               |
| Montiaceae       | <i>Claytonia</i>      | 33   | Few  | 2 (0.05)    | 1 (0.01)   | 9 (0.25)               |
| Montiaceae       | <i>Lewisia</i>        | 16   | Most | 12 (0.75)   | 8 (0.5)    | 16 (1.0)               |
| Montiaceae       | <i>Montia</i>         | 20   | Most | 15 (0.75)   | 10 (0.5)   | 20 (1.0)               |
| Montiaceae       | <i>Phemeranthus</i>   | 25   | All  | 25 (1.0)    | 19 (0.75)  | 25 (1.0)               |
| Montiaceae       | <i>Rumic astrum</i>   | 66   | Most | 50 (0.75)   | 33 (0.5)   | 63 (0.95) <sup>2</sup> |
| Orchidaceae      | <i>Acianthera</i>     | 299  | Most | 225 (0.75)  | 150 (0.5)  | 299 (1.0)              |
| Orchidaceae      | <i>Aerangis</i>       | 59   | All  | 59 (1.0)    | 45 (0.75)  | 59 (1.0)               |
| Orchidaceae      | <i>Aeranthes</i>      | 44   | All  | 44 (1.0)    | 33 (0.75)  | 44 (1.0)               |
| Orchidaceae      | <i>Aerides</i>        | 30   | All  | 30 (1.0)    | 23 (0.75)  | 30 (1.0)               |
| Orchidaceae      | <i>Anathallis</i>     | 149  | Few  | 8 (0.05)    | 2 (0.01)   | 38 (0.25)              |
| Orchidaceae      | <i>Angraecum</i>      | 223  | All  | 223 (1.0)   | 168 (0.75) | 223 (1.0)              |
| Orchidaceae      | <i>Arachnis</i>       | 16   | All  | 16 (1.0)    | 12 (0.75)  | 16 (1.0)               |
| Orchidaceae      | <i>Aspasia</i>        | 7    | Most | 6 (0.75)    | 4 (0.5)    | 7 (1.0)                |
| Orchidaceae      | <i>Barkeria</i>       | 18   | All  | 18 (1.0)    | 14 (0.75)  | 18 (1.0)               |
| Orchidaceae      | <i>Bogoria</i>        | 14   | Few  | 1 (0.05)    | 1 (0.01)   | 4 (0.25)               |
| Orchidaceae      | <i>Brassavola</i>     | 19   | All  | 19 (1.0)    | 15 (0.75)  | 19 (1.0)               |
| Orchidaceae      | <i>Brassia</i>        | 68   | Most | 51 (0.75)   | 34 (0.5)   | 68 (1.0)               |
| Orchidaceae      | <i>Bryobium</i>       | 27   | Few  | 2 (0.05)    | 1 (0.01)   | 7 (0.25)               |
| Orchidaceae      | <i>Bulbophyllum</i>   | 2145 | Most | 1609 (0.75) | 1073 (0.5) | 2145 (1.0)             |
| Orchidaceae      | <i>Caluera</i>        | 5    | Most | 4 (0.75)    | 3 (0.5)    | 5 (1.0)                |
| Orchidaceae      | <i>Campylocentrum</i> | 77   | All  | 77 (1.0)    | 58 (0.75)  | 77 (1.0)               |
| Orchidaceae      | <i>Capanemia</i>      | 8    | Most | 6 (0.75)    | 4 (0.5)    | 8 (1.0)                |
| Orchidaceae      | <i>Cattleya</i>       | 129  | Most | 97 (0.75)   | 65 (0.5)   | 129 (1.0)              |
| Orchidaceae      | <i>Caularthron</i>    | 4    | All  | 4 (1.0)     | 3 (0.75)   | 4 (1.0)                |
| Orchidaceae      | <i>Chiloschista</i>   | 26   | All  | 26 (1.0)    | 20 (0.75)  | 26 (1.0)               |
| Orchidaceae      | <i>Cis Schweinfia</i> | 11   | Most | 9 (0.75)    | 6 (0.5)    | 11 (1.0)               |
| Orchidaceae      | <i>Coelogyne</i>      | 595  | Most | 447 (0.75)  | 298 (0.5)  | 595 (1.0)              |
| Orchidaceae      | <i>Comparettia</i>    | 79   | All  | 79 (1.0)    | 60 (0.75)  | 79 (1.0)               |
| Orchidaceae      | <i>Coryanthes</i>     | 65   | Most | 49 (0.75)   | 33 (0.5)   | 65 (1.0)               |
| Orchidaceae      | <i>Cymbidium</i>      | 85   | Most | 64 (0.75)   | 43 (0.5)   | 85 (1.0)               |
| Orchidaceae      | <i>Dendrobium</i>     | 1594 | Most | 1196 (0.75) | 797 (0.5)  | 1594 (1.0)             |
| Orchidaceae      | <i>Dendrophylax</i>   | 15   | All  | 15 (1.0)    | 12 (0.75)  | 15 (1.0)               |

|             |                        |      |      |             |            |            |
|-------------|------------------------|------|------|-------------|------------|------------|
| Orchidaceae | <i>Didymoplexis</i>    | 20   | All  | 20 (1.0)    | 15 (0.75)  | 20 (1.0)   |
| Orchidaceae | <i>Dimerandra</i>      | 7    | Most | 6 (0.75)    | 4 (0.5)    | 7 (1.0)    |
| Orchidaceae | <i>Domingoa</i>        | 4    | Most | 3 (0.75)    | 2 (0.5)    | 4 (1.0)    |
| Orchidaceae | <i>Echinosepala</i>    | 17   | Few  | 1 (0.05)    | 1 (0.01)   | 5 (0.25)   |
| Orchidaceae | <i>Elleanthus</i>      | 128  | Most | 96 (0.75)   | 64 (0.5)   | 128 (1.0)  |
| Orchidaceae | <i>Encyclia</i>        | 170  | Most | 128 (0.75)  | 85 (0.5)   | 170 (1.0)  |
| Orchidaceae | <i>Epidendrum</i>      | 1764 | Most | 1323 (0.75) | 882 (0.5)  | 1764 (1.0) |
| Orchidaceae | <i>Eria</i>            | 48   | Most | 36 (0.75)   | 24 (0.5)   | 48 (1.0)   |
| Orchidaceae | <i>Eriopsis</i>        | 4    | Most | 3 (0.75)    | 2 (0.5)    | 4 (1.0)    |
| Orchidaceae | <i>Erycina</i>         | 7    | Most | 6 (0.75)    | 4 (0.5)    | 7 (1.0)    |
| Orchidaceae | <i>Eulophia</i>        | 281  | Most | 211 (0.75)  | 141 (0.5)  | 281 (1.0)  |
| Orchidaceae | <i>Gomesa</i>          | 125  | All  | 125 (1.0)   | 94 (0.75)  | 125 (1.0)  |
| Orchidaceae | <i>Gongora</i>         | 69   | Few  | 4 (0.05)    | 1 (0.01)   | 18 (0.25)  |
| Orchidaceae | <i>Guarianthe</i>      | 4    | All  | 4 (1.0)     | 3 (0.75)   | 4 (1.0)    |
| Orchidaceae | <i>Hintonella</i>      | 1    | Most | 1 (0.75)    | 1 (0.5)    | 1 (1.0)    |
| Orchidaceae | <i>Ionopsis</i>        | 6    | Most | 5 (0.75)    | 3 (0.5)    | 6 (1.0)    |
| Orchidaceae | <i>Jacquiiniella</i>   | 12   | Most | 9 (0.75)    | 6 (0.5)    | 12 (1.0)   |
| Orchidaceae | <i>Laelia</i>          | 24   | All  | 24 (1.0)    | 18 (0.75)  | 24 (1.0)   |
| Orchidaceae | <i>Leochilus</i>       | 12   | All  | 12 (1.0)    | 9 (0.75)   | 12 (1.0)   |
| Orchidaceae | <i>Lockhartia</i>      | 33   | Most | 25 (0.75)   | 17 (0.5)   | 33 (1.0)   |
| Orchidaceae | <i>Luisia</i>          | 48   | All  | 48 (1.0)    | 36 (0.75)  | 48 (1.0)   |
| Orchidaceae | <i>Lycaste</i>         | 36   | Few  | 2 (0.05)    | 1 (0.01)   | 9 (0.25)   |
| Orchidaceae | <i>Macradenia</i>      | 13   | Most | 10 (0.75)   | 7 (0.5)    | 13 (1.0)   |
| Orchidaceae | <i>Macroclinium</i>    | 49   | Most | 37 (0.75)   | 25 (0.5)   | 49 (1.0)   |
| Orchidaceae | <i>Maxillaria</i>      | 651  | Half | 326 (0.5)   | 163 (0.25) | 489 (0.75) |
| Orchidaceae | <i>Meiracyllium</i>    | 2    | All  | 2 (1.0)     | 2 (0.75)   | 2 (1.0)    |
| Orchidaceae | <i>Microcoelia</i>     | 34   | All  | 34 (1.0)    | 26 (0.75)  | 34 (1.0)   |
| Orchidaceae | <i>Micropera</i>       | 22   | All  | 22 (1.0)    | 17 (0.75)  | 22 (1.0)   |
| Orchidaceae | <i>Mobilabium</i>      | 1    | All  | 1 (1.0)     | 1 (0.75)   | 1 (1.0)    |
| Orchidaceae | <i>Mormodes</i>        | 85   | All  | 85 (1.0)    | 64 (0.75)  | 85 (1.0)   |
| Orchidaceae | <i>Myoxanthus</i>      | 52   | Most | 39 (0.75)   | 26 (0.5)   | 52 (1.0)   |
| Orchidaceae | <i>Myrmecophila</i>    | 9    | All  | 9 (1.0)     | 7 (0.75)   | 9 (1.0)    |
| Orchidaceae | <i>Notylia</i>         | 55   | All  | 55 (1.0)    | 42 (0.75)  | 55 (1.0)   |
| Orchidaceae | <i>Oberonia</i>        | 272  | Most | 204 (0.75)  | 136 (0.5)  | 272 (1.0)  |
| Orchidaceae | <i>Oeonia</i>          | 5    | All  | 5 (1.0)     | 4 (0.75)   | 5 (1.0)    |
| Orchidaceae | <i>Oncidium</i>        | 336  | Most | 252 (0.75)  | 168 (0.5)  | 336 (1.0)  |
| Orchidaceae | <i>Ornithocephalus</i> | 56   | All  | 56 (1.0)    | 42 (0.75)  | 56 (1.0)   |
| Orchidaceae | <i>Pabstiella</i>      | 133  | All  | 133 (1.0)   | 100 (0.75) | 133 (1.0)  |
| Orchidaceae | <i>Peristeria</i>      | 13   | All  | 13 (1.0)    | 10 (0.75)  | 13 (1.0)   |
| Orchidaceae | <i>Phalaenopsis</i>    | 78   | All  | 78 (1.0)    | 59 (0.75)  | 78 (1.0)   |
| Orchidaceae | <i>Platyrrhiza</i>     | 1    | Most | 1 (0.75)    | 1 (0.5)    | 1 (1.0)    |
| Orchidaceae | <i>Plectorrhiza</i>    | 5    | All  | 5 (1.0)     | 4 (0.75)   | 5 (1.0)    |
| Orchidaceae | <i>Plectrophora</i>    | 10   | All  | 10 (1.0)    | 8 (0.75)   | 10 (1.0)   |
| Orchidaceae | <i>Pleurothallis</i>   | 548  | Most | 411 (0.75)  | 274 (0.5)  | 548 (1.0)  |
| Orchidaceae | <i>Pomatocalpa</i>     | 23   | All  | 23 (1.0)    | 18 (0.75)  | 23 (1.0)   |
| Orchidaceae | <i>Pomatocalpa</i>     | 23   | All  | 23 (1.0)    | 18 (0.75)  | 23 (1.0)   |
| Orchidaceae | <i>Prosthechea</i>     | 124  | Most | 93 (0.75)   | 62 (0.5)   | 124 (1.0)  |

|                |                       |      |      |            |            |             |
|----------------|-----------------------|------|------|------------|------------|-------------|
| Orchidaceae    | <i>Psychilis</i>      | 15   | Few  | 1 (0.05)   | 1 (0.01)   | 4 (0.25)    |
| Orchidaceae    | <i>Psychopsis</i>     | 4    | All  | 4 (1.0)    | 3 (0.75)   | 4 (1.0)     |
| Orchidaceae    | <i>Pterostemma</i>    | 4    | All  | 4 (1.0)    | 3 (0.75)   | 4 (1.0)     |
| Orchidaceae    | <i>Quekettia</i>      | 7    | Most | 6 (0.75)   | 4 (0.5)    | 7 (1.0)     |
| Orchidaceae    | <i>Rhinerrhiza</i>    | 1    | All  | 1 (1.0)    | 1 (0.75)   | 1 (1.0)     |
| Orchidaceae    | <i>Robiquetia</i>     | 94   | All  | 94 (1.0)   | 71 (0.75)  | 94 (1.0)    |
| Orchidaceae    | <i>Rodriguezia</i>    | 47   | All  | 47 (1.0)   | 36 (0.75)  | 47 (1.0)    |
| Orchidaceae    | <i>Rossioglossum</i>  | 11   | Most | 9 (0.75)   | 6 (0.5)    | 11 (1.0)    |
| Orchidaceae    | <i>Saccolabiopsis</i> | 14   | All  | 14 (1.0)   | 11 (0.75)  | 14 (1.0)    |
| Orchidaceae    | <i>Saccolabium</i>    | 4    | All  | 4 (1.0)    | 3 (0.75)   | 4 (1.0)     |
| Orchidaceae    | <i>Sarcochilus</i>    | 23   | All  | 23 (1.0)   | 18 (0.75)  | 23 (1.0)    |
| Orchidaceae    | <i>Scaphyglottis</i>  | 78   | Most | 59 (0.75)  | 39 (0.5)   | 78 (1.0)    |
| Orchidaceae    | <i>Schoenorchis</i>   | 28   | All  | 28 (1.0)   | 21 (0.75)  | 28 (1.0)    |
| Orchidaceae    | <i>Sobralia</i>       | 171  | Most | 129 (0.75) | 86 (0.5)   | 171 (1.0)   |
| Orchidaceae    | <i>Solenangis</i>     | 4    | All  | 4 (1.0)    | 3 (0.75)   | 4 (1.0)     |
| Orchidaceae    | <i>Solenidium</i>     | 3    | All  | 3 (1.0)    | 3 (0.75)   | 3 (1.0)     |
| Orchidaceae    | <i>Specklinia</i>     | 109  | Most | 82 (0.75)  | 55 (0.5)   | 109 (1.0)   |
| Orchidaceae    | <i>Stelis</i>         | 1332 | Some | 333 (0.25) | 67 (0.05)  | 666 (0.5)   |
| Orchidaceae    | <i>Taeniophyllum</i>  | 245  | All  | 245 (1.0)  | 184 (0.75) | 245 (1.0)   |
| Orchidaceae    | <i>Tetramicra</i>     | 10   | All  | 10 (1.0)   | 8 (0.75)   | 10 (1.0)    |
| Orchidaceae    | <i>Thrixspermum</i>   | 191  | All  | 191 (1.0)  | 144 (0.75) | 191 (1.0)   |
| Orchidaceae    | <i>Tolumnia</i>       | 27   | Most | 21 (0.75)  | 14 (0.5)   | 27 (1.0)    |
| Orchidaceae    | <i>Trachoma</i>       | 16   | All  | 16 (1.0)   | 12 (0.75)  | 16 (1.0)    |
| Orchidaceae    | <i>Trichocentrum</i>  | 90   | All  | 90 (1.0)   | 68 (0.75)  | 90 (1.0)    |
| Orchidaceae    | <i>Trichoglottis</i>  | 86   | All  | 86 (1.0)   | 65 (0.75)  | 86 (1.0)    |
| Orchidaceae    | <i>Trichopilia</i>    | 46   | Most | 35 (0.75)  | 23 (0.5)   | 46 (1.0)    |
| Orchidaceae    | <i>Trichotosia</i>    | 76   | Few  | 4 (0.05)   | 1 (0.01)   | 19 (0.25)   |
| Orchidaceae    | <i>Trizeuxis</i>      | 1    | All  | 1 (1.0)    | 1 (0.75)   | 1 (1.0)     |
| Orchidaceae    | <i>Tuberolabium</i>   | 9    | All  | 9 (1.0)    | 7 (0.75)   | 9 (1.0)     |
| Orchidaceae    | <i>Vanda</i>          | 85   | All  | 85 (1.0)   | 64 (0.75)  | 85 (1.0)    |
| Orchidaceae    | <i>Vanilla</i>        | 118  | All  | 118 (1.0)  | 89 (0.75)  | 118 (1.0)   |
| Orchidaceae    | <i>Warmingia</i>      | 4    | Most | 3 (0.75)   | 2 (0.5)    | 4 (1.0)     |
| Orchidaceae    | <i>Zygostates</i>     | 25   | Most | 19 (0.75)  | 13 (0.5)   | 25 (1.0)    |
| Passifloraceae | <i>Adenia</i>         | 106  | Few  | 6 (0.05)   | 2 (0.01)   | 27 (0.25)   |
| Piperaceae     | <i>Peperomia</i>      | 1416 | Half | 708 (0.5)  | 354 (0.25) | 1062 (0.75) |
| Plantaginaceae | <i>Littorella</i>     | 3    | All  | 3 (1.0)    | 3 (0.75)   | 3 (1.0)     |
| Polypodiaceae  | <i>Dictymia</i>       | 2    | All  | 2 (1.0)    | 2 (0.75)   | 2 (1.0)     |
| Polypodiaceae  | <i>Lecanopteris</i>   | 13   | All  | 13 (1.0)   | 10 (0.75)  | 13 (1.0)    |
| Polypodiaceae  | <i>Microsorium</i>    | 32   | Half | 16 (0.5)   | 8 (0.25)   | 24 (0.75)   |
| Polypodiaceae  | <i>Niphidium</i>      | 11   | All  | 11 (1.0)   | 9 (0.75)   | 11 (1.0)    |
| Polypodiaceae  | <i>Platyserium</i>    | 17   | All  | 17 (1.0)   | 13 (0.75)  | 17 (1.0)    |
| Polypodiaceae  | <i>Pyrrosia</i>       | 69   | Most | 52 (0.75)  | 35 (0.5)   | 69 (1.0)    |
| Portulacaceae  | <i>Cistanthe</i>      | 43   | Most | 33 (0.75)  | 22 (0.5)   | 43 (1.0)    |
| Portulacaceae  | <i>Portulaca</i>      | 150  | All  | 150 (1.0)  | 113 (0.75) | 150 (1.0)   |
| Pteridaceae    | <i>Haplopteris</i>    | 39   | Few  | 2 (0.05)   | 1 (0.01)   | 10 (0.25)   |
| Pteridaceae    | <i>Polytaenium</i>    | 12   | Most | 9 (0.75)   | 6 (0.5)    | 12 (1.0)    |
| Pteridaceae    | <i>Vittaria</i>       | 22   | Most | 17 (0.75)  | 11 (0.5)   | 22 (1.0)    |

|                 |                     |     |      |            |           |            |
|-----------------|---------------------|-----|------|------------|-----------|------------|
| Rubiaceae       | <i>Hydnophytum</i>  | 57  | Some | 15 (0.25)  | 3 (0.05)  | 57 (1.0)   |
| Rubiaceae       | <i>Myrmecodia</i>   | 26  | Some | 7 (0.25)   | 2 (0.05)  | 26 (1.0)   |
| Rubiaceae       | <i>Squamellaria</i> | 8   | Some | 2 (0.25)   | 1 (0.05)  | 8 (1.0)    |
| Talinaceae      | <i>Talinum</i>      | 27  | All  | 27 (1.0)   | 21 (0.75) | 27 (1.0)   |
| Urticaceae      | <i>Pilea</i>        | 606 | Few  | 31 (0.05)  | 7 (0.01)  | 152 (0.25) |
| Vitaceae        | <i>Cissus</i>       | 289 | Most | 217 (0.75) | 145 (0.5) | 289 (1.0)  |
| Vitaceae        | <i>Cyphostemma</i>  | 241 | Most | 181 (0.75) | 121 (0.5) | 241 (1.0)  |
| Welwitschiaceae | <i>Welwitschia</i>  | 1   | All  | 1 (1.0)    | 1 (0.75)  | 1 (1.0)    |
| Zamiaceae       | <i>Dioon</i>        | 18  | Some | 5 (0.25)   | 1 (0.05)  | 9 (0.5)    |
| Zygophyllaceae  | <i>Bulnesia</i>     | 5   | Few  | 1 (0.05)   | 1 (0.01)  | 2 (0.25)   |

<sup>1</sup>The upper bound on *Clusia* was reduced from 100% because multiple lines of evidence demonstrate that at least 7 *Clusia* species are not capable of CAM (Pachon *et al.*, 2022)

<sup>2</sup>The upper bound on Australian *Calandrinia* (referred to as *Rumicastrum*, using the POWO taxonomy) was reduced from 100% because multiple lines of evidence demonstrate that at least 3 Australian *Calandrinia* species are not capable of CAM (Hancock *et al.*, 2019)

TABLE S4. Estimated CAM species diversity in each family containing CAM species. Diversity metrics were summed by family from Table S3. Taxonomy and species counts according to World Checklist of Vascular Plants version 10 (Govaerts *et al.*, 2021), accessed through POWO (2023), which contains 349,036 accepted, non-hybrid species names. Taxa are ordered from most to fewest predicted CAM species; lower bound (LB), upper bound (UB).

|               | Family | Total species | Species with CAM (%) | Species with CAM [LB] (%) | Species with CAM [UB] (%) |
|---------------|--------|---------------|----------------------|---------------------------|---------------------------|
| Orchidaceae   | 29872  | 10181         | 10181 (34.0)         | 6800 (22.7)               | 13082 (43.8)              |
| Cactaceae     | 1794   | 1794          | 1794 (100.0)         | 1400 (78.0)               | 1794 (100.0)              |
| Bromeliaceae  | 3567   | 1787          | 1787 (50.1)          | 1229 (34.5)               | 2120 (59.4)               |
| Crassulaceae  | 1621   | 1621          | 1621 (100.0)         | 1229 (75.8)               | 1621 (100.0)              |
| Euphorbiaceae | 6530   | 1575          | 1575 (24.1)          | 1046 (16.0)               | 2131 (32.6)               |
| Apocynaceae   | 6487   | 1367          | 1367 (21.1)          | 950 (14.6)                | 1684 (26.0)               |
| Aizoaceae     | 1797   | 1274          | 1274 (70.9)          | 929 (51.7)                | 1435 (79.9)               |
| Asphodelaceae | 1213   | 793           | 793 (65.4)           | 595 (49.1)                | 814 (67.1)                |
| Piperaceae    | 3831   | 708           | 708 (18.5)           | 354 (9.2)                 | 1062 (27.7)               |
| Asteraceae    | 33994  | 460           | 460 (1.4)            | 145 (0.4)                 | 839 (2.5)                 |
| Asparagaceae  | 3359   | 449           | 449 (13.4)           | 302 (9.0)                 | 584 (17.4)                |
| Vitaceae      | 1022   | 398           | 398 (38.9)           | 266 (26.0)                | 530 (51.9)                |
| Clusiaceae    | 919    | 242           | 242 (26.3)           | 161 (17.5)                | 306 (33.3)                |

|                   |       |     |             |            |             |
|-------------------|-------|-----|-------------|------------|-------------|
| Isoëtaceae        | 193   | 193 | 193 (100.0) | 145 (75.1) | 193 (100.0) |
| Portulacaceae     | 193   | 183 | 183 (94.8)  | 135 (69.9) | 193 (100.0) |
| Montiaceae        | 276   | 176 | 176 (63.8)  | 121 (43.8) | 224 (81.2)  |
| Commelinaceae     | 763   | 133 | 133 (17.4)  | 89 (11.7)  | 176 (23.1)  |
| Polypodiaceae     | 4252  | 111 | 111 (2.6)   | 77 (1.8)   | 136 (3.2)   |
| Geraniaceae       | 812   | 79  | 79 (9.7)    | 17 (2.1)   | 156 (19.2)  |
| Lamiaceae         | 7662  | 79  | 79 (1.0)    | 17 (0.2)   | 164 (2.1)   |
| Anacampserotaceae | 62    | 62  | 62 (100.0)  | 47 (75.8)  | 62 (100.0)  |
| Alismataceae      | 114   | 39  | 39 (34.2)   | 30 (26.3)  | 39 (34.2)   |
| Hydrocharitaceae  | 136   | 31  | 31 (22.8)   | 22 (16.2)  | 36 (26.5)   |
| Urticaceae        | 2074  | 31  | 31 (1.5)    | 7 (0.3)    | 152 (7.3)   |
| Pteridaceae       | 1371  | 28  | 28 (2.0)    | 18 (1.3)   | 44 (3.2)    |
| Gesneriaceae      | 3792  | 27  | 27 (0.7)    | 21 (0.6)   | 27 (0.7)    |
| Talinaceae        | 28    | 27  | 27 (96.4)   | 21 (75.0)  | 27 (96.4)   |
| Rubiaceae         | 14075 | 24  | 24 (0.2)    | 6 (< 0.1)  | 91 (0.6)    |
| Didiereaceae      | 20    | 20  | 20 (100.0)  | 18 (90.0)  | 20 (100.0)  |
| Basellaceae       | 19    | 18  | 18 (94.7)   | 14 (73.7)  | 18 (94.7)   |
| Cucurbitaceae     | 1052  | 12  | 12 (1.1)    | 10 (1.0)   | 12 (1.1)    |
| Passifloraceae    | 1029  | 6   | 6 (0.6)     | 2 (0.2)    | 27 (2.6)    |
| Zamiaceae         | 248   | 5   | 5 (2.0)     | 1 (0.4)    | 9 (3.6)     |
| Plantaginaceae    | 2106  | 3   | 3 (0.1)     | 3 (0.1)    | 3 (0.1)     |
| Welwitschiaceae   | 1     | 1   | 1 (100.0)   | 1 (100.0)  | 1 (100.0)   |
| Halophytaceae     | 1     | 1   | 1 (100.0)   | 1 (100.0)  | 1 (100.0)   |
| Araceae           | 4175  | 1   | 1 (< 0.1)   | 1 (< 0.1)  | 1 (< 0.1)   |
| Zygophyllaceae    | 286   | 1   | 1 (0.3)     | 1 (0.3)    | 2 (0.7)     |

## LITERATURE CITED

- Angiosperm Phylogeny Group. 2016.** An update of the Angiosperm Phylogeny Group classification for the orders and families of flowering plants: APG IV. *Botanical Journal of the Linnean Society* **181**: 1–20.
- Avadhani PN, Goh CJ, Rao AN, Arditti J. 1982.** Carbon fixation in orchids. In: **Arditti J**, ed. *Orchid biology, reviews and perspectives, II*. Ithaca, NY: Cornell University Press, 173–193.
- Arroyo MK, Medina E, Ziegler H. 1990.** Distribution and  $\delta^{13}\text{C}$  values of Portulacaceae species of the High Andes in Northern Chile. *Botanica Acta* **103**: 291–295.
- Astruc A. 1903.** Recherches sur l'acidité végétale. *Annales des sciences naturelles, Botanique* **17**: 1–105.

- Barfuss MHJ, Till W, Leme EMC, et al. 2016.** Taxonomic revision of Bromeliaceae subfam. Tillandsioideae based on a multi-locus DNA sequence phylogeny and morphology. *Phytotaxa* **279**: 1–97.
- Bartholomew B. 1973.** Drought response in the gas exchange of *Dudleya farinosa* (Crassulaceae) grown under natural conditions. *Photosynthetica* **7**: 114–120.
- Beer S, Wetzel RG. 1981.** Photosynthetic carbon metabolism in the submerged aquatic angiosperm *Scirpus subterminalis*. *Plant Science Letters* **21**: 199–207.
- Beltrán JD, Lasso E, Madriñán S, Virgo A, Winter K. 2013.** Juvenile tank-bromeliads lacking tanks: do they engage in CAM photosynthesis? *Photosynthetica* **51**: 55–62.
- Bender MM. 1971.** Variations in the  $^{13}\text{C}/^{12}\text{C}$  ratios of plants in relation to the pathway of photosynthetic carbon dioxide fixation. *Phytochemistry* **10**: 1239–1244.
- Bender MM, Rouhani I, Vines HM, Black CC Jr. 1973.**  $^{13}\text{C}/^{12}\text{C}$  ratio changes in crassulacean acid metabolism plants. *Plant Physiology* **52**: 427–430.
- Bendrat M. 1929.** Zur Physiologie der organischen Säuren in grünen Pflanzen. *Planta* **7**: 508–584.
- Bennet-Clark TA. 1933.** The rôle of the organic acids in plant metabolism. Part I. *New Phytologist* **32**: 37–71.
- Benzing DH. 1990.** *Vascular epiphytes. General biology and related biota*. Cambridge: Cambridge University Press.
- Benzing DH, Ott DW. 1981.** Vegetative reduction in epiphytic Bromeliaceae and Orchidaceae: its origin and significance. *Biotropica* **13**: 131–140.
- Benzing DH, Renfrow A. 1971.** Significance of the patterns of  $\text{CO}_2$  exchange to the ecology and phylogeny of the Tillandsioideae (Bromeliaceae). *Bulletin of the Torrey Botanical Club* **98**: 322–327.
- Bone RE, Smith JAC, Arrigo N, Buerki S. 2015.** A macro-ecological perspective on crassulacean acid metabolism (CAM) photosynthesis evolution in Afro-Madagascan drylands: Eulophiinae orchids as a case study. *New Phytologist* **208**: 469–481.
- Bonner W, Bonner J. 1948.** The role of carbon dioxide in acid formation by succulent plants. *American Journal of Botany* **35**: 113–117.
- Borland AM, Griffiths H. 1990.** The regulation of CAM and respiratory recycling by water supply and light regime in the  $\text{C}_3$ -CAM intermediate *Sedum telephium*. *Functional Ecology* **4**: 33–39.
- Borland AM, Griffiths H, Maxwell C, Broadmeadow MSJ, Griffiths NM, Barnes JD. 1992.** On the ecophysiology of the Clusiaceae in Trinidad: expression of CAM in *Clusia minor* L. during the transition from wet to dry season and characterization of three endemic species. *New Phytologist* **122**: 349–357.
- Bratzel F, Paule J, Leebens-Mack J, et al. 2023.** Target-enrichment sequencing reveals for the first time a well-resolved phylogeny of the core Bromelioideae (family Bromeliaceae). *Taxon* **72**: 47–63.
- Brilhaus D, Bräutigam A, Mettler-Altmann T, Winter K, Weber APM. 2016.** Reversible burst of transcriptional changes during induction of crassulacean acid metabolism in *Talinum triangulare*. *Plant Physiology* **170**: 102–122.

- Bruyns PV, Klak C, Hanáček P. 2017.** A revised, phylogenetically-based concept of *Ceropegia* (Apocynaceae). *South African Journal of Botany* **112**: 399–436.
- Burke A. 2017.** *111 Roadside plants. A tribute to Namibia's fascinating plant life*. Second edition. Windhoek: Namibia Scientific Society/Kuiseb Publishers.
- Carter JP, Martin CE. 1994.** The occurrence of crassulacean acid metabolism among epiphytes in a high-rainfall region of Costa Rica. *Selbyana* **15**: 104–106.
- Chellappan KP, Seeni S, Gnanam A. 1980.** Photosynthetic studies with mesophyll protoplasts from *Notonia grandiflora*, a crassulacean acid metabolism plant. *Physiologia Plantarum* **48**: 403–410.
- Chomicki G, Renner SS. 2016.** Evolutionary relationships and biogeography of the ant-epiphytic genus *Squamellaria* (Rubiaceae: Psychotrieae) and their taxonomic implications. *PLoS ONE* **11**: e0151317.
- Cockburn W. 1974.** Crassulacean acid metabolism in *Lithops insularis*; a non-halophytic member of the Mesembryanthemaceae. *Planta* **118**: 89–90.
- Cockburn W. 1985.** Variation in photosynthetic acid metabolism in vascular plants: CAM and related phenomena. *New Phytologist* **101**: 3–24.
- Cockburn W, Goh CJ, Avadhani PN. 1985.** Photosynthetic carbon assimilation in a shootless orchid, *Chiloschista usneoides* (DON) LDL. *Plant Physiology* **77**: 83–86.
- Coutinho LM. 1963.** Algumas informações sobre a ocorrência do “Efeito de De Saussure” en epífitas e erbáceas terrestres da mata pluvial. *Boletim da Faculdade de Filosofia, Ciências e Letras, Universidade de São Paulo, No. 288. Botânica* **20**: 81–98.
- Coutinho LM. 1964.** Untersuchungen über die Lage der Lichtkompensationspunkte einiger Pflanzen zu verschiedenen Zeiten mit besonderer Berücksichtigung des “De Saussure Effekts” bei Sukkulenten. *Beiträge zur Phytologie* (Walter-Festschrift). Stuttgart.
- Coutinho LM. 1969.** Novas observações sobre a ocorrência do “Efeito de De Saussure” e suas relações com a suculência, a temperatura folhear e os movimentos estomáticos. *Boletim da Faculdade de Filosofia, Ciências e Letras, Universidade de São Paulo, No. 331. Botânica* **24**: 77–102.
- Crayn DM, Smith JAC, Winter K. 2001.** Carbon-isotope ratios and photosynthetic pathways in the Neotropical family Rapateaceae. *Plant Biology* **3**: 569–576.
- Crayn DM, Winter K, Schulte K, Smith JAC. 2015.** Photosynthetic pathways in Bromeliaceae: phylogenetic and ecological significance of CAM and C<sub>3</sub> based on carbon isotope ratios for 1893 species. *Botanical Journal of the Linnean Society* **178**: 169–221.
- Daniel PP, Bryant JA, Woodward FI. 1984.** Phosphoenolpyruvate carboxylase from pennywort (*Umbilicus rupestris*): changes in properties after exposure to water stress. *Biochemical Journal* **218**: 387–393.
- de la Rosa-Manzano E, Flores J, Delgado-Sánchez P. 2016.** Effects of spine-shading on aspects of photosynthesis for three cactus species. *Botanical Sciences* **94**: 301–310.
- de Luca P, Alfani A, Virzo de Santo A. 1977.** CAM, transpiration, and adaptive mechanisms to xeric environments in the succulent Cucurbitaceae. *Botanical Gazette* **138**: 474–478.
- de Saussure T. 1804.** *Recherches chimiques sur la végétation*. Paris: Chez la V.<sup>e</sup> Nyon.



- de Vries H. 1884.** Ueber die periodische Säurebildung der Fettpflanzen. Vorläufige Mittheilung. *Botanische Zeitung* **42**: 337–344. 353–358.
- Delf EM. 1912.** Transpiration in succulent plants. *Annals of Botany* **16**: 409–442.
- Deshmukh RB, Murumkar CV. 1996.** Occurrence of crassulacean acid metabolism in leaves of *Aristolochia bracteata* Ritz. *Acta Societatis Botanicorum Polonia* **65**: 297–299.
- Deshmukh RB, Murumkar CV. 2013.** Crassulacean acid metabolism (CAM) in leaves of a common weed *Commelina nudiflora* L. *Global Journal of Biological and Biomedical Research* **1**: 9–11.
- Despain DG, Bliss LC, Boyer JS. 1970.** Carbon dioxide exchange in Saguaro seedlings. *Ecology* **51**: 912–914.
- Díaz de Arends ML. 1984.** *Estudios fisioecológicos de 4 especies de cactáceas en condiciones naturales*. M.Sc. thesis. Caracas: Instituto Venezolano de Investigaciones Científicas.
- Díaz M, Medina E. 1984.** Actividad CAM de cactáceas en condiciones naturales. In: **Medina E**, ed. *Ecofisiología de plantas CAM*. Caracas: Centro Internacional de Ecología Tropical (CIET, IVIC–UNESCO), 98–113.
- Dittrich P. 1976.** Nicotinamide adenine dinucleotide-specific “malic” enzyme in *Kalanchoë daigremontiana* and other plants exhibiting crassulacean acid metabolism. *Plant Physiology* **57**: 310–314.
- Dittrich P, Campbell WH, Black CC. 1973.** Phosphoenolpyruvate carboxykinase in plants exhibiting crassulacean acid metabolism. *Plant Physiology* **52**: 357–361.
- Dittrich P, Huber W. 1974.** Carbon dioxide metabolism in members of the Chlamydospermae. In: **Avron M**, ed. *Proceedings of the 3<sup>rd</sup> international congress on photosynthesis*. Amsterdam: Elsevier, 1573–1578.
- Earnshaw MJ, Winter K, Ziegler H, et al. 1987.** Altitudinal changes in the incidence of crassulacean acid metabolism in vascular epiphytes and related life forms in Papua New Guinea. *Oecologia* **73**: 566–572.
- Edwards EJ, Diaz M. 2006.** Ecological physiology of *Pereskia guamacho*, a cactus with leaves. *Plant, Cell and Environment* **29**: 247–256.
- Egbert KJ, Martin CE. 1999.** The influence of leaf “windows” on crassulacean acid metabolism in the South African succulent *Senecio rowleyanus* (Asteraceae). *Photosynthetica* **36**: 139–147.
- Eickmeier WG, Bender MM. 1976.** Carbon isotope ratios of crassulacean acid metabolism species in relation to climate and phytosociology. *Oecologia* **25**: 341–347.
- Endress ME, Meve U, Middleton DJ, Liede-Schumann S. 2018.** Apocynaceae. In: **Kubitzki K**, ed. *The families and genera of vascular plants*, Volume XV, **Kadereit JW, Bittrich V**, eds, *Flowering plants – Eudicots – Apiales, Gentianales (except Rubiaceae)*. Cham: Springer, 207–411.
- English ND, Dettman DL, Sandquist DR, Williams DG. 2007.** Past climate changes and ecophysiological responses recorded in the isotope ratios of saguaro cactus spines. *Oecologia* **154**: 247–258.
- Fioretto A, Alfani A. 1988.** Anatomy of succulence and CAM in 15 species of *Senecio*. *Botanical Gazette* **149**: 142–152.

- Govaerts R, Lughadha EN, Black N, Turner R, Paton A. 2021.** The World Checklist of Vascular Plants, a continuously updated resource for exploring global plant diversity. *Scientific Data* **8**: 215.
- Ganzmann RJ, von Willert DJ. 1972.** Nachweis eines diurnalen Säurerhythmus beim Halophyten *Aster tripolium*. *Naturwissenschaften* **59**: 422–423.
- Gaur YD. 1968.** Preliminary studies on titratable acidity in xerophytic plants: *Salvadora persica* Linn. and *Prosopis juliflora* D.C. *Experientia* **24**: 239–240.
- Gilman IS, Moreno-Villena JJ, Lewis ZR, Goolsby EW, Edwards EJ. 2022.** Gene co-expression reveals the modularity and integration of C<sub>4</sub> and CAM in *Portulaca*. *Plant Physiology* **189**: 735–753.
- Golovko TK, Zakhochiy IG, Tabalenkova GN. 2021.** Induction of CAM photosynthesis in *Hylotelephium triphyllum* (Haw.) Holub (Crassulaceae) under climatic conditions of the European northeast of Russia. *Russian Journal of Plant Physiology* **68**: 179–187.
- Gouda E, Butcher D. 2023.** The new Bromeliad taxon list, Version 5 (22-01-2023). Accessed 6 March 2023. <https://bromeliad.nl/taxonList.php>
- Griffiths H. 1984.** Ecological distribution of bromeliads in Trinidad and their  $\delta^{13}\text{C}$  values: implications for the use of  $\delta$  values to indicate carboxylation pathways in plants. In: **Medina E**, ed. *Eco-fisiología de plantas CAM*. Caracas: Centro Internacional Ecología Tropical (CIET, IVIC–UNESCO), 145–174.
- Griffiths H. 1988.** Crassulacean acid metabolism: a re-appraisal of physiological plasticity in form and function. *Advances in Botanical Research* **15**: 43–92.
- Griffiths H. 1989.** Carbon dioxide concentrating mechanisms and the evolution of CAM in vascular epiphytes. In: **Lüttge U**, ed. *Vascular plants as epiphytes: evolution and ecophysiology*. Berlin: Springer, 42–86.
- Griffiths H, Smith JAC. 1983.** Photosynthetic pathways in the Bromeliaceae of Trinidad: relations between life-forms, habitat preference and the occurrence of CAM. *Oecologia* **60**: 176–184.
- Griffiths H, Smith JAC, Lüttge U, et al. 1989.** Ecophysiology of xerophytic and halophytic vegetation of a coastal alluvial plain in northern Venezuela. IV. *Tillandsia flexuosa* Sw. and *Schomburgkia humboldtiana* Rchb., epiphytic CAM plants. *New Phytologist* **111**: 273–282.
- Groenhof AC, Daniel PP, Bryant JA. 1985.** Adaptive changes in the properties of phosphoenolpyruvate carboxylase in water-stressed plants. *Biochemical Society Transactions* **13**: 1154–1154.
- Güerere I, Tezara W, Herrera C, Fernández MD, Herrera A. 1996.** Recycling of CO<sub>2</sub> during induction of CAM by drought in *Talinum paniculatum* (Portulacaceae). *Physiologia Plantarum* **98**: 471–476.
- Guevara-Pérez CI, Delgado-Sánchez P, Torres-Castillo JA, Flores-Rivas JD, Mendieta-Leiva D, de la Rosa-Manzano E. 2019.** Epiphytic orchids *Stanhopea tigrina* and *Prosthechea cochleata* are differentially affected by drought in a subtropical cloud forest. *Photosynthetica* **57**: 1053–1065.
- Guralnick LJ, Cline A, Smith M, Sage RF. 2008.** Evolutionary physiology: the extent of C<sub>4</sub> and CAM photosynthesis in the genera *Anacampteros* and *Grahamia* of the Portulacaceae. *Journal of Experimental Botany* **59**: 1735–1742.

- Guralnick LJ, Edwards G, Ku MSB, Hockema B, Franceschi VR. 2002.** Photosynthetic and anatomical characteristics in the C<sub>4</sub>-crassulacean acid metabolism-cycling plant, *Portulaca grandiflora*. *Functional Plant Biology* **29**: 763–773.
- Guralnick LJ, Gladsky K. 2017.** Crassulacean acid metabolism as a continuous trait: variability in the contribution of Crassulacean acid metabolism (CAM) in populations of *Portulacaria afra*. *Heliyon* **3**: e00293.
- Guralnick LJ, Jackson MD. 2001.** The occurrence and phylogenetics of crassulacean acid metabolism in the Portulacaceae. *International Journal of Plant Sciences* **162**: 257–262.
- Guralnick LJ, Ting IP, Lord EM. 1986.** Crassulacean acid metabolism in the Gesneriaceae. *American Journal of Botany* **73**: 336–345.
- Habibi G, Hajiboland R. 2011.** Comparison of water stress and UV radiation effects on induction of cam and antioxidative defense in the succulent *Rosularia elymaitica* (Crassulaceae). *Acta Biologica Cracoviensia Series Botanica* **53**: 15–24.
- Hancock LP, Holtum JAM, Edwards EJ. 2019.** The evolution of CAM photosynthesis in Australian *Calandrinia* reveals lability in C<sub>3</sub>+CAM phenotypes and a possible constraint to the evolution of strong CAM. *Integrative and Comparative Biology* **59**: 517–534.
- Hanscom Z III, Ting IP. 1978.** Responses of succulents to plant water stress. *Plant Physiology* **61**: 327–330.
- Harris FS, Martin CE. 1991.** Correlation between CAM-cycling and photosynthetic gas exchange in five species of *Talinum* (Portulacaceae). *Plant Physiology* **96**: 1118–1124.
- Hartenburg W. 1937.** Der Wasser- und Kohlensäurehaushalt tropischer Regenwaldpflanzen in sommerlicher Gewächshauskultur. *Jahrbücher für wissenschaftliche Botanik* **85**: 641–697.
- Helder RL, van Harmelen M. 1982.** Carbon assimilation pattern in the submerged leaves of the aquatic angiosperm: *Vallisneria spiralis* L. *Acta Botanica Neerlandica* **31**: 281–295.
- Hernández-González O, Briones Villareal O. 2007.** Crassulacean acid metabolism photosynthesis in columnar cactus seedlings during ontogeny: the effect of light on nocturnal acidity accumulation and chlorophyll fluorescence. *American Journal of Botany* **94**: 1344–1351.
- Herppich WB, Herppich M. 1996.** Ecophysiological investigations on plants of the genus *Plectranthus* (fam. Lamiaceae) native to Yemen and southern Africa. *Flora* **191**: 401–408.
- Herrera A, Delgado J, Paraguatey I. 1991.** Occurrence of inducible crassulacean acid metabolism in leaves of *Talinum triangulare* (Portulacaceae). *Journal of Experimental Botany* **42**: 493–499.
- Hew C-S, Wong YS. 1974.** Photosynthesis and respiration of ferns in relation to their habitat. *American Fern Journal* **64**: 40–48.
- Heyduk K, McAssey EV, Leebens-Mack J. 2022.** Differential timing of gene expression and recruitment in independent origins of CAM in the Agavoideae (Asparagaceae). *New Phytologist* **235**: 2111–2126.
- Heyduk K, McKain MR, Lalani F, Leebens-Mack J. 2016.** Evolution of a CAM anatomy predates the origins of Crassulacean acid metabolism in the Agavoideae (Asparagaceae). *Molecular Phylogenetics and Evolution* **105**: 102–113.

- Heyduk K, Ray JN, Ayyampalayam S, Leebens-Mack J. 2018.** Shifts in gene expression profiles are associated with weak and strong crassulacean acid metabolism. *American Journal of Botany* **105**: 587–601.
- Heyduk K, Ray JN, Ayyampalayam S, et al. 2019.** Shared expression of crassulacean acid metabolism (CAM) genes pre-dates the origin of CAM in the genus *Yucca*. *Journal of Experimental Botany* **70**: 6597–6609.
- Heyne B. 1815.** On the deoxidation of the leaves of *Cotyledon calycina*. *The Transactions of the Linnean Society of London* **11**: 213–215.
- Ho C-L, Chiang J-M, Lin T-C, Martin CE. 2019.** First report of C<sub>4</sub>/CAM-cycling photosynthetic pathway in a succulent grass, *Spinifex littoreus* (Brum. f.) Merr., in coastal regions of Taiwan. *Flora* **254**: 194–202.
- Hogewoning SW, Boogaart SAJ, Tongerlo E, Trouwborst G. 2021.** CAM-physiology and carbon gain of the orchid *Phalaenopsis* in response to light intensity, light integral and CO<sub>2</sub>. *Plant, Cell and Environment* **44**: 762–774.
- Holaday AS, Bowes G. 1990.** C<sub>4</sub> acid metabolism and dark CO<sub>2</sub> fixation in a submersed aquatic macrophyte (*Hydrilla verticillata*). *Plant Physiology* **65**: 331–335.
- Holdsworth M. 1971.** Carbon dioxide uptake by succulents. *Canadian Journal of Botany* **49**: 1520–1522.
- Holthe PA, Patel A, Ting IP. 1992.** The occurrence of CAM in *Peperomia*. *Selbyana* **13**: 77–87.
- Holtum JAM, Hancock LP, Edwards EJ, et al. 2016.** Australia lacks stem succulents but is it depauperate in plants with crassulacean acid metabolism (CAM)? *Current Opinion in Plant Biology* **31**: 109–117.
- Holtum JAM, Hancock LP, Edwards EJ, Winter K. 2017.** Optional use of CAM photosynthesis in two C<sub>4</sub> species, *Portulaca cyclophylla* and *Portulaca digyna*. *Journal of Plant Physiology* **214**: 91–96.
- Holtum JAM, Hancock LP, Edwards EJ, Winter K. 2018.** Crassulacean acid metabolism in the Basellaceae (Caryophyllales). *Plant Biology* **20**: 409–414.
- Holtum JAM, Hancock LP, Edwards EJ, Winter K. 2021.** CAM photosynthesis in desert blooming *Cistanthe* of the Atacama, Chile. *Functional Plant Biology* **48**: 691–702.
- Holtum JAM, Winter K. 1999.** Degrees of crassulacean acid metabolism in tropical epiphytic and lithophytic ferns. *Australian Journal of Plant Physiology* **26**: 749–10.
- Holtum JAM, Winter K. 2005.** Carbon isotope composition of canopy leaves in a tropical forest in Panama throughout a seasonal cycle. *Trees* **19**: 545–551.
- Holtum JAM, Winter K, Weeks MA, Sexton TR. 2007.** Crassulacean acid metabolism in the ZZ plant, *Zamioculcas zamiifolia* (Araceae). *American Journal of Botany* **94**: 1670–1676.
- Horn JW, Xi Z, Riina R, et al. 2014.** Evolutionary bursts in *Euphorbia* (Euphorbiaceae) are linked with photosynthetic pathway. *Evolution* **68**: 3485–3504.
- Huber J, Dettman DL, Williams DG, Hultine KR. 2018.** Gas exchange characteristics of giant cacti species varying in stem morphology and life history strategy. *American Journal of Botany* **105**: 1688–1702.

- Hultine KR, Dettman DL, English NB, Williams DG. 2019.** Giant cacti: isotopic recorders of climate variation in warm deserts of the Americas. *Journal of Experimental Botany* **70**: 6509–6519.
- Hultine KR, Williams DG, Dettman DL, Butterfield BJ, Puente-Martinez R. 2016.** Stable isotope physiology of stem succulents across a broad range of volume-to-surface area ratio. *Oecologia* **182**: 679–690.
- Ibarra-Laclette E, et al. 2015.** *De novo* sequencing and analysis of *Lophophora williamsii* transcriptome, and searching for putative genes involved in mescaline biosynthesis. *BMC Genomics* **16**: 657.
- Iwasaki I, Arata H, Nishimura M. 1988.** Ionic balance during malic acid accumulation in vacuoles of a CAM plant, *Graptopetalum paraguayense*. *Plant and Cell Physiology* **29**: 643–647.
- James WO. 1958.** Succulent plants. *Endeavour* **17**: 90–95.
- Jimenez MS, Morales D, Iriarte J, Gil F. 1983.** Succulence and CAM relationships in *Aeonium* genus. *Photosynthesis Research* **4**: 9–20.
- Jones CS, Cardon ZG, Czaja AD. 2003.** A phylogenetic view of low-level CAM in *Pelargonium* (Geraniaceae). *American Journal of Botany* **90**: 135–142.
- Kausch W. 1965.** Beziehungen zwischen Wurzelwachstum, Transpiration und CO<sub>2</sub>-Gaswechsel bei einigen Kakteen. *Planta* **66**: 229–238.
- Keeley JE. 1981.** *Isoetes howellii*: a submerged aquatic CAM plant? *American Journal of Botany* **68**: 420–424.
- Keeley J. 1996.** Aquatic CAM photosynthesis. In: **Winter K, Smith JAC**, eds. *Crassulacean acid metabolism: biochemistry, ecophysiology and evolution*. Berlin: Springer, 281–295.
- Keeley JE. 1998.** CAM photosynthesis in submerged aquatic plants. *Botanical Review* **64**: 121–175.
- Keeley JE, Keeley SC. 1989.** Crassulacean acid metabolism CAM in high elevation tropical cactus. *Plant, Cell & Environment* **12**: 331–336.
- Keeley JE, Osmond CB, Raven JA. 1984.** *Stylites*, a vascular land plant without stomata absorbs CO<sub>2</sub> via its roots. *Nature* **310**: 694–695.
- Kenyon WH, Severson RF, Black CC. 1985.** Maintenance carbon cycle in crassulacean acid metabolism plant leaves: source and compartmentation of carbon for nocturnal malate synthesis. *Plant Physiology* **77**: 183–189.
- Kluge M, Avadhani PN, Goh CJ. 1989.** Gas exchange and water relations in epiphytic ferns. In: **Lüttge U**, ed. *Vascular plants as epiphytes: evolution and ecophysiology*. Berlin: Springer, 87–108.
- Kluge M, Brulfert J, Lipp J, Ravelomanana D, Ziegler H. 1993.** A comparative study by  $\delta^{13}\text{C}$ -analysis of crassulacean acid metabolism (CAM) in *Kalanchoë* (Crassulaceae) species of Africa and Madagascar. *Plant Biology* **106**: 320–324.
- Kluge M, Brulfert J, Rauh W, Ravelomanana D, Ziegler H. 1995.** Ecophysiological studies on the vegetation of Madagascar: a  $\delta^{13}\text{C}$  and  $\delta\text{D}$  survey for incidence of crassulacean acid metabolism (CAM) among orchids from montane forests and succulents from the xerophytic thorn-bush. *Isotopes in Environmental and Health Studies* **31**: 191–210.
- Kluge M, Knapp I, Kramer D, Schwerdtner I, Ritter H. 1979.** Crassulacean acid metabolism (CAM) in leaves of *Aloe arborescens* Mill. *Planta* **145**: 357–363.

- Kluge M, Lange OL, Eichmann M von, Schmid R. 1973.** Diurnaler Säurerhythmus bei *Tillandsia usneoides*: Untersuchungen über den Weg des Kohlenstoffs sowie die Abhängigkeit des CO<sub>2</sub>-Gaswechsels von Lichtintensität, Temperatur und Wassergehalt der Pflanze. *Planta* **112**: 357–372.
- Kluge M, Ting IP. 1978.** *Crassulacean acid metabolism: analysis of an ecological adaptation*. Berlin: Springer.
- Kluge M, Vinson B, Ziegler H. 1998.** Ecophysiological studies on orchids of Madagascar: incidence and plasticity of crassulacean acid metabolism in species of the genus *Angraecum* Bory. *Plant Ecology* **135**: 43–57.
- Koch K, Kennedy RA. 1980.** Characteristics of crassulacean acid metabolism in the succulent C<sub>4</sub> dicot, *Portulaca oleracea* L. *Plant Physiology* **65**: 193–197.
- Koch KE, Kennedy RA. 1982.** Crassulacean acid metabolism in the succulent C<sub>4</sub> dicot, *Portulaca oleracea* L. under natural environmental conditions. *Plant Physiology* **69**: 757–761.
- Kraus G. 1883.** Ueber Stoffwechsel bei den Crassulaceen. *Abhandlungen der naturforschenden Gesellschaft zu Halle* **16**: 393–410.
- Kraybill AA, Martin CE. 1996.** Crassulacean acid metabolism in three species of the C<sub>4</sub> genus *Portulaca*. *International Journal of Plant Sciences* **157**: 103–109.
- Ku S-B, Shieh Y-J, Reger BJ, Black CC. 1981.** Photosynthetic characteristics of *Portulaca grandiflora*, a succulent C<sub>4</sub> dicot. *Plant Physiology* **68**: 1073–1080.
- Lange OL, Schulze E-D, Kappen L, Evenari M, Buschbom U. 1975.** CO<sub>2</sub> exchange pattern under natural conditions of *Caralluma negevensis*, a CAM plant of the Negev Desert. *Photosynthetica* **9**: 318–326.
- Lange OL, Zuber M. 1977.** *Frerea indica*, a stem succulent CAM plant with deciduous C<sub>3</sub> leaves. *Oecologia* **31**: 67–72.
- Lara MV, Drincovich MF, Andreo CS. 2004.** Induction of a crassulacean acid-like metabolism in the C<sub>4</sub> succulent plant, *Portulaca oleracea* L.: study of enzymes involved in carbon fixation and carbohydrate metabolism. *Plant and Cell Physiology* **45**: 618–626.
- Lee HSJ, Griffiths H. 1987.** Induction and repression of CAM in *Sedum telephium* L. in response to photoperiod and water stress. *Journal of Experimental Botany* **38**: 834–841.
- Lee KC, An J, Hwang JE, et al. 2021.** Effects of light condition on growth and physiological characteristics of the endangered species *Sedirea japonica* under RCP 6.0 climate change scenarios. *Plants* **10**: 1891.
- Lehmann D, Mfunne JKE, Gewers E, Brain C, Voigt CC. 2015.** Individual variation of isotopic niches in grazing and browsing desert ungulates. *Oecologia* **179**: 75–88.
- Lehmann D, Mfunne JKE, Gewers E, Cloete J, Brain C, Voigt CC. 2013.** Dietary plasticity of generalist and specialist ungulates in the Namibian desert: a stable isotopes approach. *PLoS ONE* **8**: e27190.
- Liu B, Yan J, Li W, et al. 2020.** *Mikania micrantha* genome provides insights into the molecular mechanism of rapid growth. *Nature Communications* **11**: 340.

- Llano C, Ugan A. 2014.** Alternative interpretations of intermediate and positive d13C isotope signals in prehistoric human remains from Southern Mendoza, Argentina: the role of CAM species consumption. *Current Anthropology* **55**: 822–831.
- Long ER. 1915.** Acid accumulation and destruction in large succulents. *The Plant World* **18**: 261–272.
- Lösch R. 1984.** Species-specific responses to temperature in acid metabolism and gas exchange performance of Macaronesian Sempervivoideae. In: **Margaris NS, Arianoutsou-Farragitaki M, Oechel WC**, eds. *Tasks for vegetation science*. The Hague: Dr. W. Junk, 117–126.
- Lu P-L, Morden CW. 2014.** Phylogenetic relationships among dracaenoid genera (Asparagaceae: Nolinoideae) inferred from chloroplast DNA loci. *Systematic Botany* **39**: 90–104.
- Lüttge U, Ball, E. 1987.** Dark respiration of CAM plants. *Plant Physiology and Biochemistry* **25**: 3–10.
- Lüttge U, Medina E, Cram WJ, Lee HSJ, Popp M, Smith JAC. 1989a.** Ecophysiology of xerophytic and halophytic vegetation of a coastal alluvial plain in northern Venezuela. II. Cactaceae. *New Phytologist* **111**: 245–251.
- Lüttge U, Popp M, Medina E, et al. 1989b.** Ecophysiology of xerophytic and halophytic vegetation of a coastal alluvial plain in northern Venezuela. V. The *Batis maritima*–*Sesuvium portulacastrum* vegetation unit. *New Phytologist* **111**: 283–291.
- Mabberley DJ. 2017.** *Mabberley's plant-book*. 4<sup>th</sup> edition. Cambridge: Cambridge University Press.
- Madsen TV. 1987.** Sources of inorganic carbon acquired through CAM in *Littorella uniflora* (L.) Aschers. *Journal of Experimental Botany* **38**: 367–377.
- Manning J, Boatwright JS, Daru BH, Maurin O, van der Bank M. 2014.** A molecular phylogeny and generic classification of Asphodelaceae subfamily Alooideae: a final resolution of the prickly issue of polyphyly in the alooids? *Systematic Botany* **39**: 55–74.
- Markovska YK. 1999.** Gas exchange and malate accumulation in *Haberlea rhodopensis* grown under different irradiances. *Biologia Plantarum* **42**: 559–565.
- Markovska YK, Dimitrov DS. 2001.** The effect of leaf age on gas exchange and malate accumulation in C<sub>3</sub>-CAM plant *Marrubium frivaldszkyanum* (Lamiaceae). *Photosynthetica* **39**: 191–195.
- Markovska YK, Kimenov GP, Tsonev TD. 1989.** Presence of crassulacean acid metabolism in higher plants *Haberlea rhodopensis* Friv. and *Ramonda serbica* Panč. *Photosynthetica* **23**: 364–367.
- Markovska Y, Tsonev T, Kimenov G. 1997.** Regulation of CAM and respiratory recycling by water supply in higher poikilohydric plants — *Haberlea rhodopensis* Friv. and *Ramonda serbica* Panč, at transition from biosis to anabiosis and *vice versa*. *Botanica Acta* **110**: 18–24.
- Martin CE, Gravatt DA, Loeschen VS. 1994.** Crassulacean acid metabolism in three species of Commelinaceae. *Annals of Botany* **74**: 457–463.
- Martin CE, Herppich WB, Roscher Y, Burkart M. 2019.** Relationships between leaf succulence and Crassulacean acid metabolism in the genus *Sansevieria* (Asparagaceae). *Flora* **261**: 151489.
- Martin CE, Higley M, Wang W-Z. 1988.** CAM-cycling and CAM-idling in *Drosanthemum hispidum* (L.) Schwant. (Mesembryanthemaceae). *Journal of Plant Physiology* **132**: 303–306.

- Martin CE, Hsu RCC, Lin TC. 2009.** The relationship between CAM and leaf succulence in two epiphytic vines, *Hoya carnosa* and *Dischidia formosana* (Asclepiadaceae), in a subtropical rainforest in northeastern Taiwan. *Photosynthetica* **47**: 445–450.
- Martin CE, Loeschen VS, Coke LB. 1990.** Crassulacean acid metabolism in selected terrestrial succulents in southeastern Jamaica, including two species in the Commelinaceae. *Oecologia* **84**: 99–102.
- Martin CE, Lubbers AE, Teeri JA. 1982.** Variability in crassulacean acid metabolism: a survey of North Carolina succulent species. *Ecology* **143**: 491–497.
- Martin CE, Wallace RS. 2000.** Photosynthetic pathway variation in leafy members of two subfamilies of the Cactaceae. *International Journal of Plant Sciences* **161**: 639–650.
- Martin CE, Zee AK. 1983.** C<sub>3</sub> photosynthesis and crassulacean acid metabolism in a Kansas rock outcrop succulent, *Talinum calycinum* Engelm. (Portulacaceae). *Plant Physiology* **73**: 718–723.
- Martin SL, Davis R, Protti P, Lin T-C, Lin SH, Martin CE. 2005.** The occurrence of crassulacean acid metabolism in epiphytic ferns, with an emphasis on the Vittariaceae. *International Journal of Plant Sciences* **166**: 623–630.
- Masrahi YS, Al-Yemeni MN, Al-Turki TA, Sayed OH. 2011.** Ecophysiological mechanisms of succulent survival in natural conditions: photosynthetic carbon fixation in *Caralluma acutangula* (Decne. N.E.Br.) (Asclepiadaceae). *Polish Journal of Ecology* **59**: 505–510.
- Masrahi YS, Al-Turki TA, Sayed OH. 2012.** Crassulacean acid metabolism permutation and survival of *Caralluma* species (Apocynaceae) in arid habitats. *Ecologia Balkanica* **4**: 63–71.
- Masrahi YS, Al-Turki TA, Sayed OH. 2015.** Photosynthetic adaptation and survival strategy of *Duvalia velutina* in an extremely arid environment. *Photosynthetica* **53**: 555–561.
- Master RWP. 1959.** Organic acid and carbohydrate metabolism in *Nopalea cochinellifera*. *Experientia* **15**: 30–31.
- Matimati I, Musil CF, Raitt L, February EC. 2012.** Diurnal stem diameter variations show CAM and C<sub>3</sub> photosynthetic modes and CAM–C<sub>3</sub> switches in arid South African succulent shrubs. *Agricultural and Forest Meteorology* **161**: 72–79.
- Mayer A. 1875.** Über die Bedeutung der organischen Säuren in den Pflanzen. *Die Landwirtschaftlichen Versuchsstationen* **18**: 410–452. [not seen]
- McWilliams EL. 1970.** Comparative rates of dark CO<sub>2</sub> uptake and acidification in the Bromeliaceae, Orchidaceae, and Euphorbiaceae. *Botanical Gazette* **131**: 285–290.
- Medina E. 1974.** Dark CO<sub>2</sub> fixation, habitat preference and evolution within the Bromeliaceae. *Evolution* **28**: 677–686.
- Medina E, Delgado M. 1976.** Photosynthesis and night CO<sub>2</sub> fixation in *Echeveria columbiana* v. Poellnitz. *Photosynthetica* **10**: 155–163.
- Medina E, Delgado M, Troughton JH, Medina JD. 1977.** Physiological ecology of CO<sub>2</sub> fixation in Bromeliaceae. *Flora* **166**: 137–152.
- Meinzer FC, Rundel PW. 1973.** Crassulacean acid metabolism and water use efficiency in *Echeveria pumila*. *Photosynthetica* **7**: 358–364.



- Medina E, Troughton JH. 1974.** Dark CO<sub>2</sub> fixation and the carbon isotope ratio in Bromeliaceae. *Plant Science Letters* **2**: 357–362.
- Messerschmid TFE, Wehling J, Bobon N, et al. 2021.** Carbon isotope composition of plant photosynthetic tissues reflects a crassulacean acid metabolism (CAM) continuum in the majority of CAM lineages. *Perspectives in Plant Ecology, Evolution and Systematics* **51**: 125619.
- Milburn TR, Pearson DJ, Ndegwe NA. 1968.** Crassulacean acid metabolism under natural tropical conditions. *New Phytologist* **67**: 883–897.
- Minardi BD, Voytena APL, Santos M, Randi ÁM. 2014.** Water stress and abscisic acid treatments induce the CAM pathway in the epiphytic fern *Vittaria lineata* (L.) Smith. *Photosynthetica* **52**: 404–412.
- Mok D, Leung A, Searles P, Sage TL, Sage RF. 2023.** CAM photosynthesis in *Bulnesia retama* (Zygophyllaceae), a non-succulent desert shrub from South America. *Annals of Botany*, mcad114, doi.org/10.1093/aob/mcad114.
- Mooney H, Troughton JH, Berry JA. 1974.** Arid climates and photosynthetic systems. *Carnegie Institution of Washington Year Book* **73**: 793–805.
- Mooney HA, Troughton JH, Berry JA. 1977a.** Carbon isotope ratio measurements of succulent plants in southern Africa. *Oecologia* **30**: 295–305.
- Mooney HA, Weisser PJ, Gulmon SL. 1977b.** Environmental adaptations of the Atacaman Desert cactus *Copiapoa haseltoniana*. *Flora* **166**: 117–124.
- Mooney HA, Bullock SH, Ehleringer JR. 1989.** Carbon isotope ratios of plants of a tropical dry forest in Mexico. *Functional Ecology* **3**: 137–142.
- Motomura H, Yukawa T, Ueno O, Kagawa A. 2008.** The occurrence of crassulacean acid metabolism in *Cymbidium* (Orchidaceae) and its ecological and evolutionary implications. *Journal of Plant Research* **121**: 163–177.
- Murumkar CV, Magdum DK, Sanagar KS, Chavan PD. 1991.** CAM-behaviour in a weed, *Thlaspi arvense* L. *Photosynthetica* **25**: 129–131.
- Neales TF. 1975.** The gas exchange patterns of CAM plants. In: **Marcelle R**, ed. *Environmental and biological control of photosynthesis*. The Hague: Dr. W. Junk, 299–310.
- Neales TF, Patterson AA, Hartney VJ. 1968.** Physiological adaptation to drought in the carbon assimilation and water loss of xerophytes. *Nature* **219**: 469–472.
- Nisbet RA, Patten DT. 1974.** Seasonal temperature acclimation of a prickly-pear cactus in south-central Arizona. *Oecologia* **15**: 345–352.
- Nishida K. 1963.** Studies on stomatal movement of crassulacean plants in relation to the acid metabolism. *Physiologia Plantarum* **16**: 281–298.
- Nobel PS. 1976.** Water relations and photosynthesis of a desert CAM plant, *Agave deserti*. *Plant Physiology* **58**: 576–582.
- Nobel PS. 1977.** Water relations and photosynthesis of a barrel cactus, *Ferocactus acanthodes*, in the Colorado Desert. *Oecologia* **27**: 117–133.
- Nobel PS. 1988.** *Environmental biology of agaves and cacti*. Cambridge. Cambridge University Press.

- Nobel PS, Hartsock TL. 1986.** Leaf and stem CO<sub>2</sub> uptake in the three subfamilies of the Cactaceae. *Plant Physiology* **80**: 913–917.
- Nobel PS, Lüttge U, Heuer S, Ball E. 1984.** Influence of applied NaCl on Crassulacean acid metabolism and ionic levels in a cactus, *Cereus validus*. *Plant Physiology* **75**: 799–803.
- Nobel PS, Zaragoza LJ, Smith WK. 1975.** Relation between mesophyll surface area, photosynthetic rate, and illumination level during development for leaves of *Plectranthus parviflorus* Henckel. *Plant Physiology* **55**: 1067–1070.
- Nuernbergk EL. 1954.** Über den zeitlichen Verlauf der Photosynthese bei Gewächshauspflanzen. *Die Gartenbauwissenschaft* **19**: 391–398.
- Nuernbergk EL. 1961.** Endogener Rhythmus und CO<sub>2</sub>-Stoffwechsel bei Pflanzen mit diurnalem Säurerhythmus. *Planta* **56**: 28–70.
- Nuernbergk EL. 1963.** On the CO<sub>2</sub> metabolism of orchids and its ecological aspect. In: *Proceedings of the 4<sup>th</sup> World Orchid Conference*. Singapore: Straits Times Press, 158–169.
- Ocampo G, Columbus JT. 2010.** Molecular phylogenetics of suborder Cactineae (Caryophyllales), including insights into photosynthetic diversification and historical biogeography. *American Journal of Botany* **97**: 1827–1847.
- Oeschger H, Lerman JC. 1970.** Die Radiokarbonmethode nach 20 Jahren Anwendung. *Chemische Rundschau* **23**: 585–588. [not seen]
- Olivares E, Medina E. 1990.** Carbon dioxide exchange, soluble carbohydrates and acid accumulation in a fructan accumulating plant: *Fourcroya humboldtiana* Treal. *Journal of Experimental Botany* **41**: 579–585.
- Olivares E, Urich R, Montes G, Coronel I, Herrera A. 1984.** Occurrence of crassulacean acid metabolism in *Cissus trifoliata* L. (Vitaceae). *Oecologia* **61**: 358–362.
- Oliveira RP, Zotz G, Wanek W, Franco AC. 2021.** Leaf trait co-variation and trade-offs in gallery forest C<sub>3</sub> and CAM epiphytes. *Biotropica* **53**: 520–535.
- Osmond CB, Allaway WG, Sutton BG, et al. 1973.** Carbon isotope discrimination in photosynthesis of CAM plants. *Nature* **246**: 41–42.
- Osmond CB, Ziegler H, Stichler W, Trimborn P. 1975.** Carbon isotope discrimination in alpine succulent plants supposed to be capable of crassulacean acid metabolism (CAM). *Oecologia* **18**: 209–217.
- Oyungerel S, Tsendekhuu T, Tserenkhand G. 2004.** A study to detect CAM plants in Mongolia. *Mongolian Journal of Biological Sciences* **2**: 29–37.
- Pachon P, Winter K, Lasso E. 2022.** Updating the occurrence of crassulacean acid metabolism (CAM) in the genus *Clusia* through carbon isotope analysis of species from Colombia. *Photosynthetica* **60**: 304–322.
- Patil MP, Murumkar CV. 2017.** Occurrence of CAM activity in stem of *Capparis decidua* (Forssk) Edg. *Genetics and Plant Physiology* **7**: 171–175.
- Patten DT, Dinger BE. 1969.** Carbon dioxide exchange patterns of cacti from different environments. *Ecology* **50**: 686–688.

- Pilon-Smits EAH, 't Hart H, Maas JW, Meesterburrie JAN, Kreuler R, van Brederode J. 1992.** The evolution of crassulacean acid metabolism in *Aeonium* inferred from carbon isotope composition and enzyme activities. *Oecologia* **91**: 548–553.
- Pilon-Smits EAH, 't Hart H, Meesterburrie JAN, Naber P, Kreuler R, van Brederode J. 1991.** Variation in crassulacean acid metabolism within the genus *Sedum*: carbon isotope composition and water status dependent phosphoenolpyruvate carboxylase activity. *Journal of Plant Physiology* **137**: 342–346.
- POWO. 2023.** Plants of the World Online. Royal Botanic Gardens, Kew, United Kingdom. URL: <http://www.plantsoftheworldonline.org/>.
- Qiu S, Sultana S, Liu ZD, Yin LY, Wang CY. 2015.** Identification of obligate C<sub>3</sub> photosynthesis in *Dendrobium*. *Photosynthetica* **53**: 168–176.
- Ramana G, Chaitanya K. 2015.** Variations in  $\delta^{13}\text{C}$  rates and crassulacean acid metabolism of six *Coleus* species. *British Journal of Applied Science & Technology* **6**: 295–303.
- Ramírez-Morillo IM, Carnevali G, et al. 2018a.** Phylogenetic relationships of *Hechtia* (Hechtioideae; Bromeliaceae). *Phytotaxa* **376**: 227–253.
- Ramírez-Morillo IM, Romero-Soler K, Carnevali G, et al. 2018b.** The reestablishment of *Bakerantha*, and a new genus in Hechtioideae (Bromeliaceae) in Megamexico, *Mesoamerantha*. *Harvard Papers in Botany* **23**: 301–312.
- Rao IM, Swamy PM, Das VSR. 1979.** Some characteristics of crassulacean acid metabolism in five nonsucculent scrub species under natural semiarid conditions. *Zeitschrift für Pflanzenphysiologie* **94**: 201–210.
- Ravetta DA, McLaughlin SP. 1993.** Photosynthetic pathways of *Hesperaloe funifera* and *H. nocturna* (Agavaceae): novel sources of specialty fibers. *American Journal of Botany* **80**: 524–532.
- Rayder L, Ting IP. 1981.** Carbon metabolism in two species of *Pereskia* (Cactaceae). *Plant Physiology* **68**: 139–142.
- Rayder L, Ting IP. 1983a.** Shifts in the carbon metabolism of *Xerosicyos danguyi* H. Humb. (Cucurbitaceae) brought about by water stress. I. General characteristics. *Plant Physiology* **72**: 606–610.
- Rayder L, Ting IP. 1983b.** CAM-idling in *Hoya carnosa* (Asclepiadaceae). *Photosynthesis Research* **4**: 203–211.
- Reddy AR, Das VSR. 1978.** The decarboxylating systems in fourteen taxa exhibiting CAM pathway. *Zeitschrift für Pflanzenphysiologie* **86**: 141–146.
- Reyes-García C, Orellana R, Ek SD, et al. 2022.** Weak crassulacean acid metabolism and other xerophytic adaptive traits in the genus *Beaucarnea* Lem. (Asparagaceae). *Physiologia Plantarum* **174**: e13816.
- Reinert F, Blankenship RE. 2010.** Evolutionary aspects of crassulacean acid metabolism. *Oecologia Australis* **14**: 359–368.

- Reinert F, Roberts A, Wilson JM, de Ribas L, Cardinot G, Griffiths H. 1997.** Gradation in nutrient composition and photosynthetic pathways across the restinga vegetation of Brazil. *Botanica Acta* **110**: 135–142.
- Ricalde MF, Andrade JL, Durán R, Dupuy JM, Simá JL, Us-Santamaría R, Santiago LS. 2010.** Environmental regulation of carbon isotope composition and crassulacean acid metabolism in three plant communities along a water availability gradient. *Oecologia* **164**: 871–880.
- Richards HM. 1915.** *Acidity and gas interchange in cacti*. Publication No. 209. Washington, D.C.: Carnegie Institution of Washington.
- Rivera ER, Smith BN. 1979.** Crystal morphology and <sup>13</sup>carbon/<sup>12</sup>carbon composition of solid calcium oxalate in cacti. *Plant Physiology* **64**: 966–970.
- Roth-Nebelsick A, Thiv M, Malkowsky Y, Schott R, Heyer A. 2021.** Structure and functional anatomy of the gas exchange apparatus of leafless orchids: evidence for a control mechanism? *Botanical Journal of the Linnean Society* **197**: 249–262.
- Ruess BR, Eller BM. 1985.** The correlation between crassulacean acid metabolism and water uptake in *Senecio medley-woodii*. *Planta* **166**: 57–66.
- Rundel PW, Esler KJ, Cowling RM. 1999.** Ecological and phylogenetic patterns of carbon isotope discrimination in the winter-rainfall flora of the Richtersveld, South Africa. *Plant Ecology* **142**: 133–148.
- Rundel PW, Rundel JA, Ziegler H, Stichler W. 1979.** Carbon isotope ratios of central Mexican Crassulaceae in natural and greenhouse environments. *Oecologia* **38**: 45–50.
- Santiago LS, Silvera K, Andrade JL, Dawson TE. 2017.** Functional strategies of tropical dry forest plants in relation to growth form and isotopic composition. *Environmental Research Letters* **12**: 115006.
- Sayed OH. 2001.** Crassulacean acid metabolism 1975–2000, a check list. *Photosynthetica* **39**: 339–352.
- Schmidt G, Zotz G. 2001.** Ecophysiological consequences of differences in plant size: *in situ* carbon gain and water relations of the epiphytic bromeliad, *Vriesea sanguinolenta*. *Plant, Cell and Environment* **24**: 101–111.
- Schmitt AK, Lee HSJ, Lüttge U. 1988.** The response of the C<sub>3</sub>-CAM tree, *Clusia rosea*, to light and water stress. I. Gas exchange characteristics. *Journal of Experimental Botany* **39**: 1581–1590.
- Schuber M, Kluge M. 1979.** Crassulaceen-Säurestoffwechsel (CAM) bei mitteleuropäischen Sukkulente: ökologische Untersuchungen an *Sempervivum*-Arten. *Flora* **168**: 205–216.
- Schulze E-D, Lange OL, Ziegler H, Gebauer G. 1991.** Carbon and nitrogen isotope ratios of mistletoes growing on nitrogen and non-nitrogen fixing hosts and on CAM plants in the Namib desert confirm partial heterotrophy. *Oecologia* **88**: 457–462.
- Schulze E-D, Ziegler H, Stichler W. 1976.** Environmental control of crassulacean acid metabolism in *Welwitschia mirabilis* Hook. Fil. in its range of natural distribution in the Namib desert. *Oecologia* **24**: 323–334.

- Schütte KH, Steyn R, van der Westhuizen M. 1967.** Crassulacean acid metabolism in South African succulents: a preliminary investigation into its occurrence in various families. *Journal of South African Botany* **33**: 107–110.
- Seeni S, Gnanam A. 1980.** Photosynthesis in cell suspension cultures of the CAM plant *Chamaecereus sylvestrii* (Cactaceae). *Physiologia Plantarum* **49**: 465–472.
- Sen DN. 1970.** A report of crassulacean acid metabolism in *Euphorbia caducifolia* Haines and its diversity. *Current Science* **39**: 116–117.
- Sen DN, Sharma KD, Chawan DD. 1971.** Leafless *Euphorbia* in Rajasthan rocks. V. The organic acid metabolism of *E. caducifolia* Haines. *New Phytologist* **70**: 381–387.
- Seshagiri PVV, Suryanarayanamurthy A. 1957.** Studies in the organic acid metabolism of *Ananas sativa* L. – I. *Journal of the Indian Botanical Society* **36**: 254–261.
- Sideris CP, Young HY, Chun HHQ. 1948.** Diurnal changes and growth rates as associated with ascorbic acid, titratable acidity, carbohydrate and nitrogenous fractions in the leaves of *Ananas comosus* (L.) Merr. *Plant Physiology* **23**: 38–69.
- Sikolia S, Beck E, Kinyamario JI, Onyango JC, Ouma G. 2008.**  $\delta^{13}$  values of the *Centrospermeae* species and their ecological implications in the semi arid conditions. *International Journal of Botany* **4**: 421–429.
- Silvera K, Santiago LS, Cushman JC, Winter K. 2009.** Crassulacean acid metabolism and epiphytism linked to adaptive radiations in the Orchidaceae. *Plant Physiology* **149**: 1838–1847.
- Silvera K, Santiago LS, Cushman JC, Winter K. 2010.** The incidence of crassulacean acid metabolism in Orchidaceae derived from carbon isotope ratios: a checklist of the flora of Panama and Costa Rica. *Botanical Journal of the Linnean Society* **163**: 194–222.
- Silvera K, Santiago LS, Winter K. 2005.** Distribution of crassulacean acid metabolism in orchids of Panama: evidence of selection for weak and strong modes. *Functional Plant Biology* **32**: 397–411.
- Silvera K, Winter K, Rodriguez BL, Albion RL, Cushman JC. 2014.** Multiple isoforms of phosphoenolpyruvate carboxylase in the Orchidaceae (subtribe Oncidiinae): implications for the evolution of crassulacean acid metabolism. *Journal of Experimental Botany* **65**: 3623–3636.
- Sinclair R. 1984.** Water relations of tropical epiphytes: III. Evidence for crassulacean acid metabolism. *Journal of Experimental Botany* **35**: 1–7.
- Smith BN, Epstein S. 1971.** Two categories of  $^{13}\text{C}/^{12}\text{C}$  ratios for higher plants. *Plant Physiology* **47**: 380–384.
- Smith BN, Madhavan S. 1982.** Carbon isotope ratios in obligate and facultative CAM plants. In: **Ting IP, Gibbs M**, eds. *Crassulacean acid metabolism*. Rockville, MD: American Society of Plant Physiologists, 231–243.
- Smith GF, Figueiredo E. 2020.** Asphodelaceae. In: **Eggl U, Nyffeler R**, eds. *Illustrated handbook of succulent plants: Monocotyledons*. Second edition. Berlin: Springer Nature, 475–481.
- Smith JAC, Griffiths H, Bassett M, Griffiths NM. 1985.** Day-night changes in the leaf water relations of epiphytic bromeliads in the rain forests of Trinidad. *Oecologia* **67**: 475–485.

- Smith JAC, Winter K. 1996.** Taxonomic distribution of crassulacean acid metabolism. In: **Winter K, Smith JAC**, eds. *Crassulacean acid metabolism: biochemistry, ecophysiology and evolution*. Berlin: Springer, 427–436.
- Spalding MH, Stumpf DK, Ku MSB, Burris RH, Edwards GE. 1979.** Crassulacean acid metabolism and diurnal variations of internal CO<sub>2</sub> and O<sub>2</sub> concentrations in *Sedum praealtum* DC. *Australian Journal of Plant Physiology* **6**: 557–567.
- Spoehr HA. 1913.** Photochemische Vorgänge bei der diurnalen Entsäuerung der Succulenten. *Biochemische Zeitschrift* **57**: 95–111.
- Spoehr HA. 1919.** *The carbohydrate economy of cacti*. Publication No. 287. Washington, D.C.: Carnegie Institution of Washington.
- Sternberg LO, DeNiro MJ, Ting IP. 1984.** Carbon, hydrogen, and oxygen isotope ratios of cellulose from plants having intermediary photosynthetic modes. *Plant Physiology* **74**: 104–107.
- Sutton BG, Ting IP, Troughton JH. 1976.** Seasonal effects on carbon isotope composition of cactus in a desert environment. *Nature* **261**: 42–43.
- Szarek SR, Johnson HB, Ting IP. 1973.** Drought adaptation in *Opuntia basilaris*. Significance of recycling carbon through Crassulacean acid metabolism. *Plant Physiology* **52**: 539–541.
- Szarek SR, Ting IP. 1977.** The occurrence of Crassulacean acid metabolism among plants. *Photosynthetica* **11**: 330–342.
- Szpak P, White CD, Longstaffe FJ, Millaire J-F, Sánchez VFV. 2013.** Carbon and nitrogen isotopic survey of northern Peruvian plants: baselines for paleodietary and paleoecological studies. *PLoS ONE* **8**: e53763.
- Taisma MA, Herrera A. 1998.** A relationship between fecundity, survival, and the operation of crassulacean acid metabolism in *Talinum triangulare*. *Canadian Journal of Botany* **76**: 1908–1915.
- Takawira-Nyenyra R, Mucina L, Cardinal-McTeague WM, Thiele KR. 2018.** *Sansevieria* (Asparagaceae, Nolinoideae) is a herbaceous clade within *Dracaena*: inference from non-coding plastid and nuclear DNA sequence data. *Phytotaxa* **376**: 254–276.
- Teeri JA. 1982.** Photosynthetic variation in the Crassulaceae. In: **Ting IP, Gibbs M**, eds. *Crassulacean acid metabolism*. Rockville, MD: American Society of Plant Physiologists, 244–259.
- Teeri JA, Tonsor SJ, Turner M. 1981.** Leaf thickness and carbon isotope composition in the Crassulaceae. *Oecologia* **50**: 367–369.
- Tenhunen JD, Tenhunen LC, Ziegler H, Stichler W, Lange OL. 1982.** Variation in carbon isotope ratios of Sempervivoideae species from different habitats of Teneriffe in the spring. *Oecologia* **55**: 217–224.
- Thoday D, Evans H. 1931.** Buffer systems in *Kleinia articulata*. *Protoplasma* **14**: 64–74.
- Thoday D, Jones KM. 1939.** Acid metabolism and respiration in succulent Compositae. I. Malic acid and respiration during starvation in *Kleinia articulata*. *Annals of Botany* **3**: 677–698.
- Thoday D, Richards KM. 1944.** Acid metabolism and respiration in succulent Compositae. II. Respiration during starvation in *Kleinia radicans*. *Annals of Botany* **8**: 189–203.

- Thomas M, Beevers H. 1949.** Physiological studies on acid metabolism in green plants. II. Evidence of CO<sub>2</sub> fixation in *Bryophyllum* and the study of diurnal variation of acidity in this genus. *New Phytologist* **48**: 421–447.
- Thomas M, Ranson SL. 1954.** Physiological studies on acid metabolism in green plants. III. Further evidence of CO<sub>2</sub>-fixation during dark acidification of plants showing Crassulacean acid metabolism. *New Phytologist* **53**: 1–27.
- Tinoco-Ojanguren C, Vázquez-Yanes C. 1983.** Especies CAM en la selva húmeda tropical de Los Tuxtlas, Veracruz. *Boletín de la Sociedad Botánica de México* **45**: 150–153.
- Ting IP. 1976.** Crassulacean acid metabolism in natural ecosystems in relation to annual CO<sub>2</sub> uptake patterns and water utilization. In: **Burriss RH, Black CC**, eds, *CO<sub>2</sub> metabolism and plant productivity*. Baltimore: University Park Press, 251–268.
- Ting IP. 1989.** Photosynthesis of arid and subtropical succulent plants. *Aliso* **12**: 387–406.
- Ting IP, Burk JH. 1983.** Aspects of carbon metabolism in *Welwitschia*. *Plant Science Letters* **32**: 279–285.
- Ting IP, Dugger WM Jr. 1968.** Non-autotrophic carbon dioxide metabolism in cacti. *Botanical Gazette* **129**: 9–15.
- Ting IP, Hanscom Z III. 1977.** Induction of acid metabolism in *Portulacaria afra*. *Plant Physiology* **59**: 511–514.
- Ting IP, Lord EM, Sternberg L da SL, DeNiro MJ. 1985.** Crassulacean acid metabolism in the strangler *Clusia rosea* Jacq. *Science* **229**: 969–971.
- Ting IP, Sternberg LO, DeNiro MJ. 1983.** Variable photosynthetic metabolism in leaves and stems of *Cissus quadrangularis* L. *Plant Physiology* **71**: 677–679.
- Torres-Morales G, Lasso E, Silvera K, Turner BL, Winter K. 2020.** Occurrence of crassulacean acid metabolism in Colombian orchids determined by leaf carbon isotope ratios. *Botanical Journal of the Linnean* **193**: 431–477.
- Treichel S. 1975.** Crassulaceensäurestoffwechsel bei einem salztoleranten Vertreter der Aizoaceae: *Aptenia cordifolia*. *Plant Science Letters* **4**: 141–144.
- Treichel S, Bauer P. 1974.** Unterschiedliche NaCl-Abhängigkeit des tagesperiodischen CO<sub>2</sub>-Gaswechsels bei einigen halisch wachsenden Küstenpflanzen. *Oecologia* **17**: 87–95.
- Treseder KK, Davidson DW, Ehleringer JR. 1995.** Absorption of ant-provided carbon dioxide and nitrogen by a tropical epiphyte. *Nature* **375**: 173–175.
- Treutlein J, Smith GF, Van Wyk B-E, Wink M. 2003.** Phylogenetic relationships in Asphodelaceae (subfamily Alooidae) inferred from chloroplast DNA sequences (*rbcL*, *matK*) and from genomic fingerprinting (ISSR). *Taxon* **52**: 193–207.
- Troughton JH, Card KA, Björkman O. 1974a.** Temperature effects on the carbon isotope ratio of C<sub>3</sub>, C<sub>4</sub>, and CAM plants *Carnegie Institution of Washington Year Book* **73**: 780–785.
- Troughton JH, Card KA, Hendy CH. 1974b.** Photosynthetic pathways and carbon isotope discrimination by plants. *Carnegie Institution of Washington Year Book* **73**: 768–780.

- Tsen EWJ, Holtum JAM. 2012.** Crassulacean acid metabolism (CAM) in an epiphytic ant-plant, *Myrmecodia beccarii* Hook.f. (Rubiaceae). *Photosynthesis Research* **113**: 311–320.
- Veste M, Herppich WB. 2021.** Comparative ecophysiology of the leaf-succulents *Augea capensis* (C<sub>3</sub>) and *Malephora purpureo-crocea* (CAM) in the Knersvlakte, Succulent Karoo, South Africa. *Flora* **278**: 151807.
- Veste M, Herppich WB, von Willert DJ. 2001.** Variability of CAM in leaf-deciduous succulents from the Succulent Karoo (South Africa). *Basic and Applied Ecology* **2**: 283–288.
- Virzo de Santo A, Alfani A, Russo G, Fioretto A. 1983.** Relationship between CAM and succulence in some species of Vitaceae and Piperaceae. *Botanical Gazette* **144**: 342–346.
- Virzo de Santo A, Fioretto A, Bartoli G, Alfani A. 1987.** Gas exchange of two CAM species of the genus *Cissus* (Vitaceae) differing in morphological features. *Photosynthesis Research* **13**: 113–124.
- Vogel JC, Seely MK. 1977.** Occurrence of C-4 plants in the Central Namib Desert. *Madoqua* **10**: 75–78.
- von Caemmerer S, Edwards GE, Koteyeva N, Cousins AB. 2014.** Single cell C<sub>4</sub> photosynthesis in aquatic and terrestrial plants: a gas exchange perspective. *Aquatic Botany* **118**: 71–80.
- von Willert DJ. 1985.** *Welwitschia mirabilis*—new aspects in the biology of an old plant. *Advances in Botanical Research* **11**: 157–191.
- von Willert DJ, Armbrüster N, Drees T, Zaborowski M. 2005.** *Welwitschia mirabilis*: CAM or not CAM — what is the answer? *Functional Plant Biology* **32**: 389–395.
- von Willert DJ, Brinckmann E, Eller BM, Scheitler B. 1983.** CO<sub>2</sub> exchange of CAM exhibiting succulents in the southern Namib desert in relation to microclimate and water stress. *Photosynthesis Research* **4**: 289–298.
- von Willert DJ, Brinckmann E, Scheitler B, Schulze E-D, Thomas DA, Treichel S. 1980.** Ökophysiologische Untersuchungen an Pflanzen der Namib-Wüste. *Naturwissenschaften* **67**: 21–28.
- von Willert DJ, Eller BM, Brinckmann E, Baasch R. 1982.** CO<sub>2</sub> gas exchange and transpiration of *Welwitschia mirabilis* Hook. fil. in the central Namib desert. *Oecologia* **55**: 21–29.
- von Willert DJ, Eller BM, Werger MJA, Brinckmann E, Ihlenfeldt H-D. 1992.** *Life strategies of succulents in deserts. With special reference to the Namib desert.* Cambridge: Cambridge University Press.
- von Willert DJ, Thomas DA, Lobin W, Curdts E. 1977.** Ecophysiological investigations in the family of the Mesembryanthemaceae. Occurrence of a CAM and ion content. *Oecologia* **29**: 67–76.
- Vovides AP, Etherington JR, Dresser PQ, Groenhof A, Iglesias C, Ramirez JF. 2002.** CAM-cycling in the cycad *Dioon edule* Lindl. in its natural tropical deciduous forest habitat in central Veracruz, Mexico. *Botanical Journal of the Linnean Society* **138**: 155–162.
- Wang L, Zhang X, Ma Y, Qing Y, Wang H, Huang X. 2019.** The highly drought-tolerant pitaya (*Hylocereus undatus*) is a non-facultative CAM plant under both well-watered and drought conditions. *Journal of Horticultural Science and Biotechnology* **94**: 643–652.
- Warburg O. 1886.** Über die Bedeutung der organischen Säuren für den Lebensprozess der Pflanzen (speziell der sog. Fettpflanzen). *Untersuchungen aus dem botanischen Institut zu Tübingen* **2**: 53–150.



- Webb DR, Rattray MR, Brown JMA. 1988.** A preliminary survey for crassulacean acid metabolism (CAM) in submerged aquatic macrophytes in New Zealand. *New Zealand Journal of Marine and Freshwater Research* **22**: 231–235.
- Webb KL, Burley JWA. 1965.** Dark fixation of  $^{14}\text{CO}_2$  by obligate and facultative salt marsh halophytes. *Canadian Journal of Botany* **43**: 281–285.
- Wester S, Mendieta-Leiva G, Nauheimer L, Wanek W, Kreft H, Zotz G. 2011.** Physiological diversity and biogeography of vascular epiphytes at Río Changuinola, Panama. *Flora* **206**: 66–79.
- Winter K. 1973.** NaCl-induzierter Crassulaceensäurestoffwechsel bei einer weiteren Aizoacee: *Carpobrotus edulis*. *Planta* **115**: 187–188.
- Winter K. 1979.**  $\delta^{13}\text{C}$  values of some succulent plants from Madagascar. *Oecologia* **40**: 103–112.
- Winter K. 2019.** Ecophysiology of constitutive and facultative CAM photosynthesis. *Journal of Experimental Botany* **70**: 6495–6508.
- Winter K, Garcia M, Virgo A, Ceballos J, Holtum JAM. 2021a.** Does the  $\text{C}_4$  plant *Trianthema portulacastrum* (Aizoaceae) exhibit weakly expressed crassulacean acid metabolism (CAM)? *Functional Plant Biology* **48**: 655–665
- Winter K, Garcia M, Virgo A, Holtum JAM. 2019a.** Operating at the very low end of the crassulacean acid metabolism spectrum: *Sesuvium portulacastrum* (Aizoaceae). *Journal of Experimental Botany* **70**: 6561–6570.
- Winter K, Garcia M, Virgo A, Smith JAC. 2021b.** Low-level CAM photosynthesis in a succulent-leaved member of the Urticaceae, *Pilea peperomioides*. *Functional Plant Biology* **48**: 683–690.
- Winter K, Holtum JAM. 2011.** Induction and reversal of crassulacean acid metabolism in *Calandrinia polyandra*: effects of soil moisture and nutrients. *Functional Plant Biology* **38**: 576–582.
- Winter K, Holtum JAM. 2015.** Cryptic crassulacean acid metabolism (CAM) in *Jatropha curcas*. *Functional Plant Biology* **42**: 711–717.
- Winter K, Medina E, Garcia V, Mayoral ML, Muniz R. 1985.** Crassulacean acid metabolism in roots of a leafless orchid, *Campylocentrum tyrridion* Garay & Dunsterv. *Journal of Plant Physiology* **118**: 73–78.
- Winter K, Osmond CB, Pate JS. 1981.** Coping with salinity. In: **Pate JS, McComb AJ**, eds. *The biology of Australian plants*. Nedlands: University of Western Australia Press, 88–113.
- Winter K, Sage RF, Edwards EJ, Virgo A, Holtum JAM. 2019b.** Facultative crassulacean acid metabolism in a  $\text{C}_3$ – $\text{C}_4$  intermediate. *Journal of Experimental Botany* **70**: 6571–6579.
- Winter K, Schramm MJ. 1986.** Analysis of stomatal and nonstomatal components in the environmental control of  $\text{CO}_2$  exchange in leaves of *Welwitschia mirabilis*. *Plant Physiology* **82**: 173–178.
- Winter K, Smith JAC. 2022.** CAM photosynthesis: the acid test. *New Phytologist* **233**: 599–609.
- Winter K, Troughton JH, Evenari M, Läuchli A, Lüttge U. 1976.** Mineral ion composition and occurrence of CAM-like diurnal malate fluctuations in plants of coastal and desert habitats of Israel and the Sinai. *Oecologia* **25**: 125–143.

- Winter K, Virgo A, Garcia M, Aranda J, Holtum JAM. 2021c.** Constitutive and facultative crassulacean acid metabolism (CAM) in Cuban oregano, *Coleus amboinicus* (Lamiaceae). *Functional Plant Biology* **48**: 647–654.
- Winter K, Wallace BJ, Stocker GC, Roksandic Z. 1983.** Crassulacean acid metabolism in Australian vascular epiphytes and some related species. *Oecologia* **57**: 129–141.
- Wong SC, Hew CS. 1976.** Diffusive resistance, titratable acidity, and CO<sub>2</sub> fixation in two tropical epiphytic ferns. *American Fern Journal* **66**: 121–124.
- Yan X, Chang Y, Zhao W, et al. 2022.** Transcriptome profiling reveals that foliar water uptake occurs with C<sub>3</sub> and crassulacean acid metabolism facultative photosynthesis in *Tamarix ramosissima* under extreme drought. *AoB PLANTS* **14**: plab060.
- Yang X, Hu R, Yin H, et al. 2017.** The *Kalanchoë* genome provides insights into convergent evolution and building blocks of crassulacean acid metabolism. *Nature Communications* **8**: 1899.
- Yuan M, Xu F, Wang S-D, et al. 2012.** A single leaf of *Camellia oleifera* has two types of carbon assimilation pathway, C<sub>3</sub> and crassulacean acid metabolism. *Tree Physiology* **32**: 188–199.
- Zalenskii OV, Glagoleva T. 1981.** Pathway of carbon metabolism in halophytic desert species from *Chenopodiaceae*. *Photosynthetica* **15**: 244–255.
- Zhang Y, Yin L, Jiang H-S, Li W, Gontero B, Maberly SC. 2014.** Biochemical and biophysical CO<sub>2</sub> concentrating mechanisms in two species of freshwater macrophyte within the genus *Ottelia* (Hydrocharitaceae). *Photosynthesis Research* **121**: 285–297.
- Ziegler H. 1979.** Diskriminierung von Kohlenstoff- und Wasserstoffisotopen: Zusammenhänge mit dem Photosynthesemechanismus und den Standortbedingungen. *Berichte der Deutschen Botanischen Gesellschaft* **92**: 169–184.
- Ziegler H. 1996.** Carbon- and hydrogen-isotope discrimination in crassulacean acid metabolism. In: **Winter K, Smith JAC**, eds. *Crassulacean acid metabolism: biochemistry, ecophysiology and evolution*. Berlin: Springer, 336–348.
- Ziegler H, Batanouny KH, Sankhla N, Vyas OP, Stichler W. 1981.** The photosynthetic pathway types of some desert plants from India, Saudi Arabia, Egypt, and Iraq. *Oecologia* **48**: 93–99.
- Zotz G. 1997.** Substrate use of three epiphytic bromeliads. *Ecography* **20**: 264–270.
- Zotz G. 2004.** How prevalent is crassulacean acid metabolism among vascular epiphytes? *Oecologia* **138**: 184–192.
- Zotz G, Reichling P, Krack S. 1999.** Another woody hemiepiphyte with CAM: *Havetiopsis flexilis* Spruce ex Planch. et Tr. (Clusiaceae). *Flora* **194**: 215–220.
- Zotz G, Tyree MT. 1996.** Water stress in the epiphytic orchid, *Dimerandra emarginata* (G. Meyer) Hoehne. *Oecologia* **107**: 151–159.
- Zotz G, Ziegler H. 1997.** The occurrence of crassulacean acid metabolism among vascular epiphytes from Central Panama. *New Phytologist* **137**: 223–229.
